# Supplementary material for: Paediatric inflammatory multisystem syndrome temporally associated with COVID-19 (PIMS-TS): a narrative review and the viewpoint of the Latin American Society of Pediatric Intensive Care (SLACIP) Sepsis Committee
Source: PubMed Central journal article supplement — BMJ Paediatr Open. 2021 Feb 4;5(1):e000894. doi: 10.1136/bmjpo-2020-000894 (PMC7868133; doi:10.1136/bmjpo-2020-000894), 2021-02-04
Supplement: bmjpo-2020-000894.draft_revisions.pdf [file bmjpo-2020-000894.draft_revisions.pdf]

# BMJ Paediatrics Open

BMJ Paediatrics Open is committed to open peer review. As part of this commitment we make the peer review history of every article we publish publicly available.

When an article is published we post the peer reviewers' comments and the authors' responses online. We also post the versions of the paper that were used during peer review. These are the versions that the peer review comments apply to.

The versions of the paper that follow are the versions that were submitted during the peer review process. They are not the versions of record or the final published versions. They should not be cited or distributed as the published version of this manuscript.

BMJ Paediatrics Open is an open access journal and the full, final, typeset and author-corrected version of record of the manuscript is available on our site with no access controls, subscription charges or pay-per-view fees (<http://bmjpaedsopen.bmj.com>).

If you have any questions on BMJ Paediatrics Open's open peer review process please email [info.bmjpo@bmj.com](mailto:info.bmjpo@bmj.com)

# BMJ Paediatrics Open

## Paediatric Inflammatory Multisystem Syndrome Temporally associated with COVID-19 (PIMS-TS): The viewpoint of the Latin American Society of Pediatric Intensive Care (SLACIP) Sepsis Committee

|                               |                                                                                                                                                                                                                                                                                                                                                                                                                                                  |
|-------------------------------|--------------------------------------------------------------------------------------------------------------------------------------------------------------------------------------------------------------------------------------------------------------------------------------------------------------------------------------------------------------------------------------------------------------------------------------------------|
| Journal:                      | <i>BMJ Paediatrics Open</i>                                                                                                                                                                                                                                                                                                                                                                                                                      |
| Manuscript ID                 | bmjpo-2020-000894                                                                                                                                                                                                                                                                                                                                                                                                                                |
| Article Type:                 | Review                                                                                                                                                                                                                                                                                                                                                                                                                                           |
| Date Submitted by the Author: | 16-Oct-2020                                                                                                                                                                                                                                                                                                                                                                                                                                      |
| Complete List of Authors:     | Fernández-Sarmiento, Jaime ; Fundación Cardioinfantil Instituto de Cardiología, ; Universidad de La Sabana, De Souza, Daniela; Universidade de Sao Paulo Hospital Universitario de Sao Paulo<br>Jabornisky, Roberto; Universidad Nacional del Nordeste<br>Gonzalez , Gustavo Ariel ; Hospital Churruca Visca<br>Arias López, Maria del Pilar ; Ricardo Gutierrez Children's Hospital<br>Palacio , Gladys ; Ricardo Gutierrez Children's Hospital |
| Keywords:                     | Mortality, Pathology, Syndrome, Virology, Therapeutics                                                                                                                                                                                                                                                                                                                                                                                           |
|                               |                                                                                                                                                                                                                                                                                                                                                                                                                                                  |

SCHOLARONE™  
Manuscripts

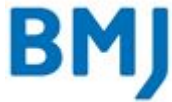

I, the Submitting Author has the right to grant and does grant on behalf of all authors of the Work (as defined in the below author licence), an exclusive licence and/or a non-exclusive licence for contributions from authors who are: i) UK Crown employees; ii) where BMJ has agreed a CC-BY licence shall apply, and/or iii) in accordance with the terms applicable for US Federal Government officers or employees acting as part of their official duties; on a worldwide, perpetual, irrevocable, royalty-free basis to BMJ Publishing Group Ltd ("BMJ") its licensees and where the relevant Journal is co-owned by BMJ to the co-owners of the Journal, to publish the Work in this journal and any other BMJ products and to exploit all rights, as set out in our [licence](#).

The Submitting Author accepts and understands that any supply made under these terms is made by BMJ to the Submitting Author unless you are acting as an employee on behalf of your employer or a postgraduate student of an affiliated institution which is paying any applicable article publishing charge ("APC") for Open Access articles. Where the Submitting Author wishes to make the Work available on an Open Access basis (and intends to pay the relevant APC), the terms of reuse of such Open Access shall be governed by a Creative Commons licence – details of these licences and which [Creative Commons](#) licence will apply to this Work are set out in our licence referred to above.

Other than as permitted in any relevant BMJ Author's Self Archiving Policies, I confirm this Work has not been accepted for publication elsewhere, is not being considered for publication elsewhere and does not duplicate material already published. I confirm all authors consent to publication of this Work and authorise the granting of this licence.

1  
2  
3  
4  
5  
6  
7  
8  
9  
10  
11  
12

**Paediatric Inflammatory Multisystem Syndrome Temporally  
associated with COVID-19 (PIMS-TS): The viewpoint of the *Latin  
American Society of Pediatric Intensive Care (SLACIP) Sepsis  
Committee***

13  
14  
15  
16  
17  
18  
19

Jaime Fernández-Sarmiento MD PhD(c)<sup>1,6</sup>, Daniela Carla de Souza MD PhD<sup>2,6</sup>, Roberto Jabornisky MD<sup>3,6</sup>, Gustavo Ariel González MD<sup>4,5,6</sup>, María del Pilar Arias López MD<sup>5,6</sup>, Gladys Palacio MD<sup>5,6</sup>.

20  
21  
22  
23  
24

1 Department of Critical Care Medicine and Pediatrics, Universidad de la Sabana, Fundación Cardioinfantil - Instituto de Cardiología. CES Graduate School. Bogotá Colombia.

25  
26  
27  
28

2 Pediatric Intensive Care Unit and Department of Pediatrics, Hospital Universitario da Universidad de São Paulo and Hospital Sírio Libanês, Sao Paulo, Brazil.

29  
30  
31

3 Department of Pediatrics. Facultad de Medicina. Universidad Nacional del Nordeste. Argentina.

32  
33  
34

4 Pediatric Intensive Care Unit. Hospital Churruca - Visca Medical Complex. Buenos Aires. Argentina.

35  
36  
37  
38

5 Pediatric Intensive Care Unit. Ricardo Gutiérrez Children's Hospital, Buenos Aires, Argentina.

39  
40  
41

6 Sepsis Committee. Latin American Society of Pediatric Intensive Care (SLACIP).

42  
43  
44  
45  
46  
47  
48

Corresponding author: Jaime Fernández-Sarmiento, MD. Universidad de La Sabana, Campus del Puente del Común, Km 7 Autopista Norte de Bogotá, Chía - Cundinamarca - Colombia - South America. JaimeFe@unisabana.edu.co. + 057-16672727 ext 2204.

49

**Abstract**

50  
51  
52  
53  
54  
55  
56  
57  
58  
59  
60

*Background:* In this review, we discuss some important aspects of Paediatric Inflammatory Multisystem Syndrome Temporally associated with COVID-19 (PIMS-TS), a new syndrome that is temporally related to previous exposure to severe acute respiratory syndrome coronavirus 2 (SARS-CoV-2) infection. This virus has a broad spectrum of presentation, as well as overlapping features with atypical Kawasaki disease (aKD). Our objective was to review and summaries published evidence regarding the

1  
2  
3 most important aspects of PIMS-TS, with special emphasis on the treatment strategies  
4 suggested for middle- and low-income countries.  
5  
6  
7

8 *Methods:* A systematic review of the literature was performed in the principal medical  
9 databases including PUBMED, EMBASE (OVID) and Google Scholar between  
10 December 2019 and August 2020.  
11  
12  
13

14  
15 *Results:* A total of 69 articles were identified in the described databases. Altogether, 13  
16 articles met the inclusion criteria and were eligible. The most frequently described  
17 symptoms of PIMS-TS include fever (82%), shock (67%), and gastrointestinal (87%),  
18 skin (71%) and cardiac disorders (75%). In most series, it has been observed between 4-  
19 6 weeks after the pandemic appears in the general population. Multisystem inflammatory  
20 syndrome in children is presented as a great systemic inflammatory response syndrome  
21 (SIRS), which sometimes evolves into septic shock features requiring fluid resuscitation  
22 and vasoactive drug support (26%). Several treatment strategies have been used,  
23 including immunoglobulin, steroids, aspirin, anakinra and anticoagulation, among others.  
24 These general and specific interventions should be guided by an inter- and multi-  
25 disciplinary team, especially in settings with limited resources.  
26  
27  
28  
29  
30  
31  
32  
33

34  
35 *Conclusions:* PIMS-TS COVID-19 is a new form of SARS-CoV-2 sepsis, with an  
36 exaggerated inflammatory response and frequent *-but not exclusive-* digestive and  
37 myocardial involvement. It is very similar in its presentation to Kawasaki disease, but  
38 should be considered as a new disease. Research is needed to establish the role of  
39 biomarkers for early diagnosis, effective therapeutic strategies, and outpatient follow-up  
40 schemes.  
41  
42  
43  
44

45  
46 *Key words:* septic shock, COVID-19, inflammation, immunoglobulin, Kawasaki disease,  
47 thrombosis, SARS-CoV-2  
48  
49  
50

### 51 **What is known about the subject?**

52 -PIMS-TS is a type of presentation of SARS-CoV-2 infection which produces a ten times  
53 greater need for hospitalization and mortality in children than other COVID-19  
54 presentations.  
55  
56

57 -It is characterized by fever, shock and gastrointestinal, skin and cardiac involvement,  
58 with prior positive RT-PCR or antibody tests.  
59  
60

1  
2  
3 -The diagnostic and treatment approach should be the same as for sepsis with organ  
4 dysfunction and viral septic shock. The specific treatment includes immunomodulators.  
5  
6  
7

### 8 **What does this study add?**

9  
10 This review summarizes the main PIMS-TS case series, with their clinical characteristics  
11 and complications. For this SARS-CoV2 disease, which mainly affects children, a  
12 comprehensive approach is suggested which may be applied under the various healthcare  
13 system access conditions, including strategies geared towards middle- and low-income  
14 countries. This treatment includes viral sepsis management and specific  
15 immunomodulatory therapy currently recommended based on the available evidence.  
16  
17  
18  
19  
20  
21

## 22 **INTRODUCTION**

23  
24 In December 2019, a new viral infection was reported for the first time in history, causing  
25 severe respiratory infection and very high mortality. According to its genetic sequencing,  
26 this virus belongs to the genus *Beta coronavirus*, closely related to the severe acute  
27 respiratory syndrome (SARS) virus. It was named SARS-CoV-2 and its disease COVID-  
28 19.<sup>1,2</sup>  
29  
30  
31

32 Healthcare systems worldwide have been deeply concerned, given SARS-CoV-2's high  
33 transmissibility, severity and lethality, particularly in the population over the age of 60.<sup>1</sup>  
34 Patients with major comorbidities such as heart disease, diabetes, hypertension, or obesity  
35 have an increased risk of dying.<sup>1,2</sup> Moreover, mortality has been associated with multiple  
36 organ failure (MOF) as the common final pathway for pneumonia, sepsis, and acute  
37 respiratory distress syndrome (ARDS). COVID-19 is usually less severe in paediatric  
38 patients. In general, 80-90% of cases are asymptomatic or have a mild infection.  
39 However, between 4 -10% may need to be transferred to a paediatric intensive care unit  
40 (PICU), and mortality ranges from 0.1% to 8%.<sup>3,4</sup> Recently, the Critical Coronavirus and  
41 Kids Epidemiology (CAKE) study reported a mortality rate of 5% in five European and  
42 American countries (Chile, Colombia, Italy, Spain and USA), with 76% of cases having  
43 severe pneumonia as their main manifestation.<sup>4</sup>  
44  
45  
46  
47  
48  
49  
50  
51  
52

53 Several pathophysiological factors may explain these features. COVID-19 non-survivors  
54 have higher serum ferritin, D-dimer and C-reactive protein (CRP) than those who survive,  
55 indicating an intense inflammatory response<sup>2</sup>. Recently, a new type of presentation of  
56 SARS-CoV-2 infection has been described in children, involving this significant  
57 inflammatory response. This new disease has been called Paediatric Inflammatory  
58  
59  
60

1  
2  
3 Multisystem Syndrome Temporally associated with COVID-19 (PIMS-TS), a new  
4 syndrome that is temporally related to previous exposure to severe acute respiratory  
5 syndrome coronavirus 2 (SARS-CoV-2) infection. This is a severe presentation of the  
6 virus in children and requires early detection to avoid its progression and potentially  
7 unsatisfactory outcomes<sup>5</sup>. In this article, we discuss and review the most relevant aspects  
8 of PIMS-TS described to date.  
9  
10  
11  
12

## 13 14 15 **METHODS**

### 16 17 **Search strategy and article selection**

18  
19  
20 A systematic review of the literature was performed in the principal medical databases  
21 including PUBMED, EMBASE (OVID) and Google scholar, using the MeSH terms  
22 (“SARS-CoV-2” OR “Covid-19” OR “coronavirus” OR “infection” OR “sepsis” OR  
23 “covid-19” OR “critical care”) AND “Multisystem Inflammatory Syndrome in Children”  
24 OR “MIS-C” OR “PIMS-TS” between December 2019 and August 2020. The descriptors  
25 were validated in DecS (descriptors in health science) and MeSH (medical subject  
26 headings). Grey literature or as yet unpublished documents were not included.  
27  
28  
29  
30  
31

### 32 33 **Eligibility criteria**

34  
35 Articles which reported at least five cases of PIMS-TS, including case series, case reports,  
36 and cross-sectional, case-control, cohort (either prospective or retrospective) or clinical  
37 trial studies, were included. Studies of critically ill children with COVID-19 were also  
38 considered, and the cases of PIMS-TS reported in these studies were explored. The World  
39 Health Organization (WHO), Centers for Disease Control (CDC) and Royal College  
40 guidelines were consulted for the definitions. Articles which did not provide complete  
41 data when reporting general cases of critically ill children with COVID-19, or those for  
42 which the full text was not available, as well as narrative reviews, were excluded.  
43  
44  
45  
46  
47  
48  
49

### 50 51 **Study selection and data collection process**

52  
53 First, the inclusion and exclusion criteria for this systematic review were defined, after  
54 which one of the researchers (JFS) performed the systematic search of the literature and  
55 reviewed the most relevant articles. The established criteria were applied, and the articles  
56 were approved by all the SLACIP sepsis committee authors. In case of doubt, or a lack  
57 of consensus regarding the inclusion of an article, a second reviewer (RJ) was consulted  
58 to decide. Any discrepancies or missing data were resolved by consensus. Preferred  
59  
60

1  
2  
3 Reporting Items for Systematic Reviews and Meta-Analysis (PRISMA) guidelines were  
4 followed. (Figure 1).  
5  
6  
7

### 8 **Patient and Public Involvement statement**

9  
10 No patients participated actively in this review. The data were taken from the most  
11 important publications to date on PIMS-TS, including consensus recommendations for  
12 high-income countries. It is expected that this information will be disseminated through  
13 SLACIP and its various committees for applicability in patients living in middle- and  
14 low-income countries.  
15  
16  
17  
18  
19

## 20 **RESULTS**

### 21 **Search and study selection results**

22  
23 A total of 69 articles were identified in the described databases. After eliminating the  
24 duplicates and reviews, 13 articles met the inclusion criteria and were eligible. These  
25 articles were included in the qualitative synthesis and the most relevant ones which do  
26 not include patients reported in other case series are described by their characteristics in  
27 *Table 1 and Table 2 (supplementary file)*.  
28  
29  
30  
31  
32  
33

## 34 **DISCUSSION**

35  
36 Although the main pathogenesis of COVID-19 may be similar to other viruses such as  
37 influenza, it has shown some clinical presentations which are different from those usually  
38 found in those classical respiratory viruses. On April 24, 2020, a new presentation of  
39 SARS-CoV-2 in children was described by Riphagen et al. in the United Kingdom<sup>6</sup>. The  
40 first communication described a cohort of eight children with COVID-19 who required  
41 hospitalization in intensive care and had an unusual clinical behavior characterized by a  
42 severe hyperinflammatory state, with clinical similarity between all eight patients<sup>7-9</sup>.

43  
44 The Royal College of Paediatrics and Child Health called this new entity PIMS-TS.<sup>10</sup>  
45 Subsequently, the CDC and WHO called it multisystem inflammatory syndrome in  
46 children (MIS-C).<sup>11,12</sup> In general, they refer to the same entity and the latter name has  
47 been the most frequently used in the main descriptions of this disease (*Table 3*).  
48  
49  
50  
51  
52  
53  
54  
55

56  
57 PIMS-TS is characterized by a very significant ongoing inflammatory response, in  
58 crescendo, which in fact has been the key element in the Atlanta CDC (May 14<sup>th</sup>) and  
59 WHO (May 15<sup>th</sup>) definitions (*Table 3*).<sup>11,12</sup> Characteristically, these patients present with  
60



1  
2  
3 high leukocytosis, CRP, procalcitonin (PCT), and serum ferritin.<sup>13</sup> Hoang et al.<sup>14</sup> reported  
4 lower expression of circulating CD16+CD56+ natural killer cells and more profound  
5 lymphopenia in children with PIMS-TS compare to those without PIMS-TS.  
6  
7

8 Primarily, there is an initial innate immune response with the macrophages as the  
9 principal actors. From the pathophysiological point of view, it is striking that more than  
10 90% of children with PIMS-TS have elevated CRP and ferritin. C-reactive protein is an  
11 acute phase reactant that usually rises after six hours of an inflammatory state and is  
12 produced by hepatocytes and adipose tissue in response to IL-1, IL-6 and TNF- $\alpha$   
13 stimulation.<sup>15,16</sup> This acute phase reactant from the pentraxin family identifies  
14 phosphatidylserine on the surface of cells that have initiated a programmed cell death  
15 pattern of apoptosis by activating the complement system.  
16  
17

18 Additionally, a marked elevation of ferritin (2-10 times its normal value) has been  
19 observed in more than 90% of the series.<sup>14,17</sup> Ferritin is a protein that stores iron and  
20 releases it in a controlled fashion, but also in pathophysiologic conditions. Its levels can  
21 reflect macrophage response to free hemoglobin as well as DNA viruses, intracellular  
22 bacterial infections and parasites.<sup>18-20</sup> Ferritin can induce positive feedback inflammation,  
23 upregulating toll-like receptor 9 (TLR-9) which leads macrophage inflammasome IL-1  
24 and IL-18 to feed forward ferritin production. TLR-9 may also be stimulated by viral  
25 DNA, other infections and host damage-associated molecular patterns (DAMP).<sup>20</sup> This  
26 whole process generates a large number of inflammasomes and an enhanced  
27 inflammatory pathway, delivering the “cytokine storm.” This precipitate cell death with  
28 a pyroptosis pattern and new DAMPs that stimulate TLR-9.<sup>20</sup> This was described as  
29 “*Hyperferritinemic Syndrome*” by Rosario.  
30  
31  
32  
33  
34  
35  
36  
37  
38  
39  
40  
41  
42  
43  
44  
45  
46  
47  
48  
49  
50  
51  
52  
53  
54  
55  
56  
57  
58  
59  
60

| Author                     | City, Country                                      | Period                | Number                                        | Age                       | Gender    | Comorbidity                                     | Race                                     | IMC kg/m <sup>2</sup>                                     |
|----------------------------|----------------------------------------------------|-----------------------|-----------------------------------------------|---------------------------|-----------|-------------------------------------------------|------------------------------------------|-----------------------------------------------------------|
| <b>Riphagen et al [6]</b>  | London, UK                                         | 10 days in mid-April  | 8                                             | 4 – 14 years (range)      | 5/8 boy   | None                                            | 6/8 Afro-Caribbean                       | 14 – 33<br>7/8 > 75 <sup>th</sup><br>centile/weight       |
| <b>Verdoni et al [7]</b>   | Bergamo, Italy                                     | Feb 18 and April 20   | 10                                            | 7.5 years (SD 3-5)        | 7/10 boys | N/R                                             | N/R                                      | N/R                                                       |
| <b>Whittaker et al [3]</b> | London, UK                                         | March 23 and May 16   | 58                                            | 9 years (IQR 5.7, 14)     | 43% boys  | 7/58 Comorbidities                              | 69% black or Asian                       | N/R                                                       |
| <b>Grimaud et al [9]</b>   | Paris, France                                      | April 15 and April 27 | 20                                            | 10 years (IQR 2.9, 15)    | 50% boys  | N/R                                             | N/R                                      | N/R                                                       |
| <b>Belhadjer et al [8]</b> | France (12 hospitals) and Switzerland (1 hospital) | March 22 to April 30  | 35                                            | 10 years (IQR 8.2, 12.4)  | 51% boys  | Comorbidities 28% (asthma 8.55; lupus 3%)       | N/R                                      | Overweight 17%                                            |
| <b>Cheung et al [13]</b>   | New York, US                                       | April 18 and May 5    | 17                                            | 8 years (IQR 1.8, 16)     | 47% boys  | Most were previously healthy (mild asthma in 3) | White 70%                                | N/R                                                       |
| <b>Toubiana et al [45]</b> | France, Paris                                      | 27 April and 11 May   | 21 children with features of Kawasaki disease | 7.9 years (IQR 3.7, 16.6) | 43% boys  | N/R                                             | 57% Sub-Saharan Africa/Caribbean islands | 76% had a BMI <b>below</b> the 97 <sup>th</sup> centile   |
| <b>Kaushik et al [38]</b>  | New York, US                                       | April 23 to May 23    | 33                                            | 10 years (IQR 6, 13)      | 61% boys  | Comorbidities 48%                               | 45% Hispanic/latino<br>39% black         | Overweight 12%<br>Obesity (BMI > 30kg/m <sup>2</sup> ) 6% |
| <b>Pouletty et al [46]</b> | Paris, France                                      | Since April 2020      | 16                                            | 10 (IQR 4.7, 12.5)        | 50% boys  | Comorbidities 37%                               | N/R                                      | Overweight 25%                                            |

|                                 |                 |                                                |     |                                                          |          |                   |                                                                                           |                            |
|---------------------------------|-----------------|------------------------------------------------|-----|----------------------------------------------------------|----------|-------------------|-------------------------------------------------------------------------------------------|----------------------------|
| <b>Ramcharan et al [40]</b>     | UK              | 10 <sup>th</sup> April and 9 <sup>th</sup> May | 15  | 8.8 (IQR 6.4, 11.2)<br>93% were over 5y                  | 73% boys |                   | 100% African/Afr-Caribbean (40%), South Asian, (40%) Mixed (13%) Or other minority ethnic |                            |
| <b>Caponi et al [47]</b>        | New York, US    | April 17 – May 13                              | 33  | 8.6 years (IQR 5.5, 12.6)                                | 61% boys | Comorbidities 21% | 73% non-Hispanic                                                                          | Overweight 6%<br>Obese 39% |
| <b>Feldstein L.R et al [48]</b> | Multicenter, US | March 15 to May 20                             | 186 | 8.3 years (IQR 3.3, 12.5)                                | 62% boys | Comorbidities 27% | 31% Hispanic, 25% Black non hispanic                                                      | Obesity 29%                |
| <b>Dufort E et al [49]</b>      | New York City   | March 01 to May 10                             | 95  | 0-5 years (31%)<br>6-12 years (42%)<br>13-20 years (27%) | 54% boys | Comorbidities 64% | 40% black<br>36% Hispanic                                                                 | Obesity 29%                |

Table 1. Demographic characteristics of patients with PIMS-TS. N/R: not reported.

### Royal College of Paediatrics and Health Child (RCPCH) Definition [10]

1. A child presenting with persistent fever, inflammation (neutrophilia, elevated CRP and lymphopaenia) and evidence of single or multi-organ dysfunction (shock, cardiac, respiratory, renal, gastrointestinal or neurological disorder) with additional features. This may include children fulfilling full or partial criteria for Kawasaki disease.
2. Exclusion of any other microbial cause, including bacterial sepsis, staphylococcal or streptococcal shock syndromes, infections associated with myocarditis such as enterovirus (waiting for results of these investigations should not delay seeking expert advice).
3. SARS-CoV-2 PCR testing may be positive or negative.

### Centers for Disease Control and Prevention (CDC) Definition [11]

- 1. An individual aged < 21 years presenting with fever<sup>1</sup>, laboratory evidence of inflammation<sup>2</sup> and evidence of clinically severe illness requiring hospitalization, with multisystem (>2) organ involvement (cardiac, renal, respiratory, hematologic, gastrointestinal, dermatologic or neurological); AND**
- 2. No alternative plausible diagnoses; AND**
- 3. Positive for current or recent SARS-CoV-2 infection by RT-PCR, serology or antigen test; or COVID-19 exposure within the 4 weeks prior to the onset of symptoms.**

<sup>1</sup>Fever  $\geq 38.0^{\circ}\text{C}$  for  $\geq 24$  hours, or report of subjective fever lasting  $\geq 24$  hours

<sup>2</sup>Including, but not limited to, one or more of the following: an elevated C-reactive protein (CRP), erythrocyte sedimentation rate (ESR), fibrinogen, procalcitonin, d-dimer, ferritin, lactic acid dehydrogenase (LDH), or interleukin 6 (IL-6), elevated neutrophils, reduced lymphocytes and low albumin.

### World Health Organization Definition [12]

Children and adolescents 0–19 years of age with fever > 3 days

**AND** two of the following:

- a) Rash or bilateral non-purulent conjunctivitis or muco-cutaneous inflammation signs (oral, hands or feet).
- b) Hypotension or shock.
- c) Features of myocardial dysfunction, pericarditis, valvulitis, or coronary abnormalities (including ECHO findings or elevated Troponin/NT-proBNP),
- d) Evidence of coagulopathy (by PT, PTT, elevated d-Dimers).
- e) Acute gastrointestinal problems (diarrhoea, vomiting, or abdominal pain).

**AND**

Elevated markers of inflammation such as ESR, C-reactive protein, or procalcitonin.

**AND**

No other obvious microbial cause of inflammation, including bacterial sepsis, staphylococcal or streptococcal shock syndromes.

**AND**

Evidence of COVID-19 (RT-PCR, antigen test or serology positive), or likely contact with patients with COVID-19.

*Table 3.* RCPCH, CDC, WHO Definitions Criteria for Paediatric Inflammatory Multisystem Syndrome Temporally associated with COVID-19

Nevertheless, there is evidence of an unusual late adaptive immunity response. It has come to the researchers' attention that PIMS-TS occurred between four and six weeks after the peak of cases reported as positive for SARS-CoV-2 in each country had been reached.<sup>5,12,14</sup> In fact, negative real-time polymerase chain reaction (RT-PCR) has been found in 40% of patients with positive antibody tests. Pérez-Toledo M et al.<sup>18</sup> recently described eight patients with PIMS-TS with a negative RT-PCR but with significant elevation of IgG and IgA, and negative IgM. Although RT-PCR is an imperfect test, it is considered the gold standard today. This suggests that, in these patients, the infection occurred possibly weeks earlier.

Additionally, they found elevated IgG1 and IgG3 in these children, which are immunoglobulin isotypes associated with serum supplement activation. This situation is consistent with highly elevated CRP related to COVID-19, which activates the complement system. The elevation of these immunoglobulins suggests that PIMS-TS occurs due to tissue damage induced by autoantibodies, a situation that has been described in other types of coronavirus infection.<sup>22-24</sup>

There is evidence that SARS-CoV-2-induced sepsis, presented as PIMS-TS, triggers a procoagulant and antifibrinolytic state evidenced by the different degrees of severe coagulopathy found in 70-80% of the series (very high D-dimers, prolonged PT, PTT).<sup>8,13</sup> Like inflammation, coagulation is necessary for the host defense. In addition, proinflammatory cytokines, monocytes / macrophages, neutrophil activation, and extracellular neutrophil traps (NETs) can foster local thrombosis. COVID-19 associated coagulopathy (CAC) is complex and in some ways pathophysiologically different from SIC<sup>25,26</sup>. Cytokine levels of IL-1 $\beta$  and IL-6 are elevated, which induces thrombocytosis

1  
2  
3 and hyperfibrinogenemia, and the angiotensin-converting enzyme 2 (ACE-2) receptor is  
4 stimulated by SARS-CoV-2, leading to a massive release of plasminogen activators.<sup>27, 28</sup>  
5 D-dimer levels are very high in PIMS-TS, but consumptive coagulopathy is rare in its  
6 early phase.<sup>25</sup> Elevated D-dimer levels can be present in a wide variety of inflammatory  
7 and prothrombotic conditions;<sup>29</sup> in COVID-19, these are probably more associated with  
8 inflammation than thrombosis.<sup>30</sup> Furthermore, serum hyaluronic acid, a key glycocalyx  
9 component, is higher during infancy, progressively diminishing over the years.<sup>19, 31</sup> This  
10 could explain a more protected endothelium and a lower probability of a hypercoagulable  
11 state. In addition, CAC has an overlapping pathophysiology with other coagulopathies  
12 like hemophagocytic syndrome (HPS) / hemophagocytic lymphohistiocytosis (HLH),  
13 antiphospholipid syndrome (APS), and thrombotic thrombocytopenic purpura (TTP) /  
14 hemolytic uremic syndrome (HUS), but some unique aspects make it a probably new type  
15 of coagulopathy.<sup>25</sup>  
16  
17  
18  
19  
20  
21  
22  
23  
24  
25  
26

27 From a clinical and laboratory perspective, PIMS-TS has usually been seen in previously  
28 healthy and frequently obese (30-60% of the series) children over eight years of age (80%  
29 of the cases)<sup>4, 5, 12, 14</sup> (*Table 1*). Initially, the group from the United Kingdom (UK) found  
30 MIS-C in patients of African descent, but it has been described in patients of all  
31 origins.<sup>4, 5, 9-11</sup> Persistent high fever for more than three to five consecutive days,  
32 maculopapular skin lesions (50-60%) reminiscent of Kawasaki disease (KD) and,  
33 frequently, signs of shock at the time of presentation have been the initial clinical  
34 characteristics.<sup>6, 7</sup> Digestive symptoms (including nausea, vomiting, diarrhea or  
35 abdominal pain) usually present in most cases, as well as myocardial involvement (more  
36 than 60% of the series).<sup>6, 7, 14</sup> Cardiac involvement is broad and variable, with features  
37 including myocardial dysfunction (100% of the initial UK description - 60% in other  
38 series), coronary aneurysms, pericarditis, arrhythmias, refractory shock and elevated  
39 troponin I or pro-BNP<sup>32-34</sup> (*Table 2*).  
40  
41  
42  
43  
44  
45  
46  
47  
48  
49  
50

51 With regard to treatment, it is important to keep in mind that PIMS-TS is a viral sepsis,  
52 and thus rapid recognition is critical, along with optimal and time-sensitive treatment. An  
53 expert consensus recently published in the United Kingdom using the Delphi method  
54 provides a good summary of the recommended treatments<sup>34</sup>. This approach is  
55 recommended for high-income countries. Using the evidence found, we adapted these  
56 recommendations, together with those of the SCCM sepsis consensus<sup>16</sup>, for use in  
57  
58  
59  
60

1  
2  
3 medium and low-income countries. We believe that a comprehensive approach to PIMS-  
4 TS patients is necessary, and that taking these recommendations as a whole could have  
5 an impact on the outcomes of PIMS-TS patients in these countries.  
6  
7  
8  
9

10 From the first presentation to the Emergency Department and / or PICU, two approaches  
11 can be assumed, one general and one specific.

12  
13 a. *General approach:* A comprehensive approach should be used, as with any patient  
14 admitted with sepsis with organ dysfunction or septic shock. In this case, the  
15 contagiousness of SARS-CoV-2 requires the use of personal protective equipment (PPE)  
16 that prevents the spread of the virus, particularly in patients with a positive RT-PCR.  
17  
18

19 Moreover, the American College of Critical Care Medicine (ACCM) points out the need  
20 to give more attention to Institutional Practice Guidelines (IPGs) based on each facility's  
21 capability.<sup>35</sup> Once IPGs are established, diagnostic and therapeutic measures known as  
22 "*patient care bundles*" (PCBs) should be developed for a better approach and control of  
23 established processes. The PCBs include three to five evidence-based practices related to  
24 a health care process that should be performed collectively to achieve a synergistic result  
25 that improves care.<sup>36,37</sup> The ACCM Sepsis Bundle includes:  
26  
27  
28  
29  
30  
31

32 1. Early detection: a comprehensive approach based on a high index of suspicion is  
33 critical. This disease may occur with a wide spectrum of symptoms, so it should be  
34 suspected in all patients with a fever lasting more than three days associated with the  
35 symptoms described in *Figure 2*. Contact with a positive case is not always clear.  
36  
37  
38

39 2. Immediate, time-sensitive resuscitation:

40 - Oxygen therapy: This is part of the strategies described in recent sepsis guidelines<sup>16</sup>.  
41 High flow nasal cannulas (HFNCs) and non-invasive ventilation (NIV) have been  
42 considered in many reports,<sup>4,8,14</sup> especially in patients who have a deteriorated respiratory  
43 pattern with the use of accessory muscles or an SaO<sub>2</sub>/FiO<sub>2</sub> ratio less than 264. Most series  
44 describe respiratory involvement ranging from 20-60% (*Table 2*) and, generally, if  
45 endotracheal intubation is required, it is more highly associated with cardiovascular  
46 involvement.  
47  
48

49 - Fluid resuscitation: It is important to consider the recommendations in recently  
50 published guidelines.<sup>16</sup> In healthcare systems where staff and equipment for advanced  
51 airway management are available, up to 40–60 mL/kg (10–20 mL/kg per bolus) of  
52 balanced crystalloids (*Ringer's lactate or Plasma-Lyte*) can be given over the first hour,  
53 titrated to clinical markers of cardiac output, and discontinued if signs of fluid overload  
54  
55  
56  
57  
58  
59  
60

1  
2  
3 develop. In healthcare systems without the availability of intubation, crystalloid boluses  
4 may only be given in cases of hypotension (decompensated shock); in these cases, up to  
5 40 mL/kg of bolus fluid (10–20 mL/kg per bolus) may be infused over the first hour with  
6 titration to clinical markers of cardiac output, and discontinued if signs of fluid overload  
7 develop. If the child is not hypotensive, but has compensated shock, only maintenance  
8 fluids should be started, avoiding bolus fluids which are associated with worse outcomes.

9  
10  
11  
12  
13 -Vasoactive drugs: According to the clinical condition, most series describe the need for  
14 vasoactive drugs in 10 to 60% of the cases with PIMS-TS. Most patients respond to fluid  
15 resuscitation. If necessary, epinephrine or norepinephrine should be considered according  
16 to the patient's condition.<sup>16</sup> Inotropes like dopamine, milrinone and levosimendan were  
17 reported to have been used in PIMS-TS.<sup>4,8,14,38</sup>

18  
19  
20  
21  
22 -Antibiotic therapy: If bacterial co-infection is suspected, the first dose is recommended  
23 within the first three hours for sepsis associated with organ dysfunction, or within the first  
24 hour for children with septic shock.<sup>16-18,39</sup>

### 25 26 27 3. Stabilization with adequate monitoring:

28  
29 If possible, advanced hemodynamic monitoring should be instituted. Cardiac  
30 ultrasound/echocardiography or  $S_{cvo2}$  measurements have been suggested by recent  
31 guidelines<sup>16</sup> and patients with PIMS-TS.<sup>40</sup>

32  
33  
34 4. Timely referral or transfer is desirable in this context, not only for advanced treatment  
35 and monitoring but also to cluster COVID-19 patients to decrease the spread of  
36 infection.<sup>16, 40,41</sup>

37  
38  
39 5. Continuous measurement of processes and corrections must be instituted for a  
40 continuous quality improvement process.<sup>16, 41, 42</sup>

41  
42  
43 *b. Specific approach:* It is important to emphasize that, in moderate to severe cases, the  
44 use of immunomodulatory treatment should be considered. Heterogeneous management  
45 including human immunoglobulin, systemic steroids, anakinra, tocilizumab and aspirin  
46 <sup>6,7,11</sup> has been reported in the described series (*Table 2*). The American College of  
47 Rheumatology (ACR) recommendations for immunomodulatory therapy<sup>42</sup> have recently  
48 been published.

49  
50  
51  
52  
53 ⇒ IVIG: High doses (2 gr/kg) should be considered for moderate to severe cases,  
54 particularly those with myocardial involvement. Prior to beginning the infusion,  
55 restored heart function must be verified.<sup>42</sup>

56  
57  
58 ⇒ Steroids: Steroids have recently been shown to be useful in modifying the clinical  
59 course of the disease in adults with severe pneumonia, particularly if they are on  
60



mechanical ventilation.<sup>43</sup> In patients with PIMS-TS, low doses could be considered in all cases (used in 70% of the series – *Table 3*) and the RTA suggests considering high doses in cases of shock or a high need for vasopressors.

⇒ Anakinra is suggested by the ACR consensus for use in cases of steroid or IVIG-refractory PIMS-TS.<sup>43,44</sup> However, in many countries, its use is not approved, or it is not available.

⇒ Anticoagulation and antiplatelet treatment: Anticoagulation has become a fundamental treatment in adults, considering that there is a procoagulant and hypofibrinolytic state in severe SARS-CoV-2 infection.<sup>17,25,26</sup> In children with PIMS-TS it is recommended only in cases of documented thrombosis or in patients with an echocardiogram ejection fraction less than 35%.<sup>43</sup> Aspirin would also be recommended in patients with thrombocytosis (> 450,000 u/L) or Kawasaki-like disease criteria.<sup>25,34,45,46</sup>

The prognosis of the disease is usually good, with patient survival greater than 95% in different published series.<sup>5,6,7,38,45-48</sup> However, there are incomplete data from all the cases, along with a knowledge gap regarding mild and moderate cases, the natural course and the clinical behavior of the disease.<sup>8,49</sup>

## Conclusion

PIMS-TS is a new form of SARS-CoV-2 sepsis, with an exaggerated inflammatory response and inadequate inflammatory resolution with frequent *-but not exclusive-*digestive and myocardial involvement. It is very similar in its presentation to KD, but should be considered as a new disease with unique symptoms, a greater variety of clinical courses, and possibly different physiological mechanisms. Research is needed to establish the role of biomarkers for early diagnosis, effective therapeutic strategies, and outpatient follow-up schemes.

## Contributors

JFS, DS, RJ, PA, GG, GP conceptualised and designed the literature search. JFS, DS, RJ initiated the search and a first draft. All authors contributed to subsequent drafts. JFS, as group leader, supervised and moderated the search, initial drafts, the overall collation of the figures and tables and final manuscript. All authors approved the final manuscript as submitted and agree to be accountable for all aspects of the work

1  
2  
3  
4  
5 **Funding** The authors have not declared a specific grant for this research from any funding  
6 agency in the public, commercial or not-for-profit sectors.  
7  
8  
9

10 **Competing interests** No, there are no competing interests.  
11  
12

13 **Patient consent for publication** Not required.  
14  
15

16 **Provenance and peer review:** Not commissioned; externally peer reviewed. Data  
17 availability statement  
18  
19

20 **Data are available statement:** no data are available.  
21  
22  
23

24 **Open access** This is an open access article distributed in accordance with the Creative  
25 Commons Attribution Non Commercial (CC BY-NC 4.0) license, which permits others  
26 to distribute, remix, adapt, build upon this work non-commercially, and license their  
27 derivative works on different terms, provided the original work is properly cited,  
28 appropriate credit is given, any changes made indicated, and the use is non-commercial.  
29 See: <http://creativecommons.org/licenses/by-nc/4.0/>.  
30  
31  
32  
33  
34  
35  
36

37 **ORCID:** iD Jaime Fernández-Sarmiento <http://orcid.org/0000-0003-2874-2949116>  
38  
39  
40  
41

## 42 REFERENCES

43  
44

- 45 1. World Health Organization. Coronavirus disease 2019 (COVID-19): situation report.  
46 Available in: <http://www.who.int/docs/default-source/coronaviruse/situation-reports.2>.  
47 28 Jun 2020.  
48
- 49 2. Yang X, Yu Y, Xu J et al. Clinical course and outcomes of critically ill patients with  
50 SARS-CoV-2 pneumonia in Wuhan, China: a single-centered, retrospective,  
51 observational study. *Lancet Respir Med*. 2020. Epub 2020/02/28. doi: 10.1016/S2213-  
52 2600(20)30079-5.  
53  
54  
55  
56  
57  
58  
59  
60

- 1  
2  
3 3. Whittaker E, Bamford A, Kenny J et al. Clinical Characteristics of 58 Children with a  
4 Pediatric Inflammatory Multisystem Syndrome Temporally Associated with SARS-  
5 CoV2-2. JAMA 2020 Jun8; e2010369. Doi:10.1001/jama.2020.10369.  
6  
7
- 8 4. González-Dambrauskas S, Vásquez-Hoyos P, Camporesi A, et al. Pediatric critical  
9 care and COVID19. Pediatrics. 2020; doi: 10.1542/peds.2020-1766.  
10
- 11 5. De Biasi RL, Song X, Delaney M, et al. Severe COVID-19 in children and young adults  
12 in the Washington, DC Metropolitan Region. J Pediatr 2020.  
13 <https://doi.org/10.1016/j.jpeds.2020.05.007>. In press.  
14  
15
- 16 6. Riphagen S, Gomez X, Gonzalez-Martinez et al. Hyperinflammatory shock in children  
17 during COVID-19 pandemic. Lancet 2020 May 7. [https://doi.org/10.1016/S0140-](https://doi.org/10.1016/S0140-6736(20)31094-1)  
18 [6736\(20\)31094-1](https://doi.org/10.1016/S0140-6736(20)31094-1). S0140-6736(20)31094- 1, ahead of print.  
19  
20
- 21 7. Verdoni L, Mazza A, Gervasoni A, et al. An outbreak of severe Kawasaki-like disease  
22 at the Italian epicenter of the SARS-CoV-2 epidemic: an observational cohort study.  
23 Lancet 2020. [https://doi.org/10.1016/S0140-6736\(20\)31103-X](https://doi.org/10.1016/S0140-6736(20)31103-X). ahead of print.  
24  
25
- 26 8. Belhadjer Z, Meot M, Bajolle F, et al. Acute heart failure in multisystem inflammatory  
27 syndrome in children (MIS-C) in the context of global SARS-CoV-2. pandemic.  
28 Circulation 2020 May 17. <https://doi.org/10.1161/CIRCULATIONAHA.120.048360>.  
29 ahead of print.  
30  
31
- 32 9. Grimaud M, Starck J, Levy M et al. Acute myocarditis and multisystem inflammatory  
33 emerging disease following SARS-CoV-2 infection in critically ill children. Ann  
34 Intensive Care 2020; 10:69.  
35  
36
- 37 10. Royal College of Paediatrics and Child Health. Available in:  
38 [https://www.rcpch.ac.uk/resources/guidance-paediatric-multisystem-inflammatory-](https://www.rcpch.ac.uk/resources/guidance-paediatric-multisystem-inflammatory-syndrome-temporally-associated-covid-19-pims)  
39 [syndrome-temporally-associated-covid-19-pims](https://www.rcpch.ac.uk/resources/guidance-paediatric-multisystem-inflammatory-syndrome-temporally-associated-covid-19-pims).  
40  
41
- 42 11. CDC. Multisystem Inflammatory Syndrome in Children (MIS-C) associated with  
43 coronavirus disease 2019 (COVID-19).  
44 <https://emergency.cdc.gov/han/2020/han00432.asp>.  
45  
46
- 47 12. WHO. Multisystem inflammatory syndrome in children and adolescents with COVID  
48 19 Scientific brief. Available en: [https://www.who.int/publications-detail/multisystem-](https://www.who.int/publications-detail/multisystem-inflammatory-syndrome-in-children-and-adolescents-with-covid-19)  
49 [inflammatory-syndrome-in-children-and-adolescents-with-covid-19](https://www.who.int/publications-detail/multisystem-inflammatory-syndrome-in-children-and-adolescents-with-covid-19). 15 May 2020.  
50  
51
- 52 13. Cheung E, Zachariah P, Gorelik M et al. Multisystem Inflammatory Syndrome  
53 Related to COVID-19 in Previously Healthy Children and Adolescents in New York City.  
54 JAMA. Published online June 8, 2020. Doi:10.1001/jama.2020.10374.  
55  
56  
57  
58  
59  
60

14. Hoang A, Chroath K, Moreira A et al., COVID-19 in 7780 pediatric patients: A systematic review, *E-Clinical Medicine* (2020), <https://doi.org/10.1016/j.eclinm.2020.100433>.
15. Tan L, Wang Q, Zhang D, et al. Lymphopenia predicts disease severity of COVID-19: a descriptive and predictive study. *Signal Transduct Target Ther.* 2020;5(1):33. Published 2020 Mar 27. doi:10.1038/s41392-020-0148-4.
16. Weiss SL, Peters MJ, Alhazzani W, et al. Surviving sepsis campaign international guidelines for the management of septic shock and sepsis-associated organ dysfunction in children. *Intensive Care Med* 2020;46 (Suppl. 1):10–67.
17. Alhazzani W, Moller MH, Arabi YM, et al. Surviving sepsis campaign: guidelines on the management of critically ill adults with Coronavirus Disease 2019 (COVID-19). *Intensive Care Med* 2020;46(5):854–87.
18. Pérez-Toledo M, Faustini S, Jossi S et al. Serology confirms SARS-CoV-2 infection in PCR-negative children presenting with Pediatric Inflammatory Multi-system syndrome. Institute of Immunology and Immunotherapy, University of Birmingham UK. Doi: <https://doi.org/10.1101/2020.06.05.20123117>. Online 07 June 2020.
19. Fernández-Sarmiento J, Salazar LM, Carcillo J. The endothelial glycocalyx: a fundamental determinant of vascular permeability in sepsis. *Ped Crit Care* 2020;21e:e291-e300.
20. Carcillo JA, Kernan KK, Horvat CM et al. Why and How Is Hyperferritinemic Sepsis Different from Sepsis Without Hyperferritinemia? *Pediatr Crit Care Med.* 2020;21(5):509-512. doi:10.1097/PCC.0000000000002285.
21. Rosário C, Zandman-Goddard G, Meyron-Holtz EG, et al: The Hyperferritinemic syndrome: Macrophage activation syndrome, Still's disease, septic shock and catastrophic antiphospholipid syndrome. *BMC Med* 2013; 11:185.
22. Jaume M, Yip MS, Cheung CY et al. Anti-severe acute respiratory syndrome coronavirus spike antibodies trigger infection of human immune cells via a pH- and cysteine protease-independent Fc. R pathway. *Journal of virology.* 2011;85(20):10582-97. 12.
23. Kam YW, Kien F, Roberts A. et al. Antibodies against trimeric S glycoprotein protect hamsters against SARS-CoV challenge despite their capacity to mediate FcγRII-dependent entry into B cells in vitro. *Vaccine.* 2007;25(4):729-40.

24. Wang SF, Tseng SP, Yen CH et al. Antibody-dependent SARS coronavirus infection is mediated by antibodies against spike proteins. *Biochemical and biophysical research communications*. 2014;451(2):208-14.
25. Iba T, Levy JH, Connors JM et al. The unique characteristics of COVID-19 coagulopathy. *Crit Care*. 2020;24(1):360. Published 2020 Jun 18. doi:10.1186/s13054-020-03077-0.
26. Iba T, Levy JH. Sepsis-induced coagulopathy and disseminated intravascular coagulation. *Anesthesiology*. 2020;132(5):1238–45.
27. Waltuch T, Gill P, Zinns LE et al. Features of COVID-19 post-infectious cytokine release syndrome in children presenting to the emergency department [published online ahead of print, 2020 May 8. *Am J Emerg Med*. 2020; S0735- 6757(20)30403-4. doi:10.1016/j.ajem.2020.05.058.
28. Varga Z, Flammer AJ, Steiger P, et al. Endothelial cell infection and endothelitis in COVID-19. *Lancet*. 2020;395(10234):1417–8.
29. Yu B, Li X, Chen J, et al. Evaluation of variation in D-dimer levels among COVID-19 and bacterial pneumonia: a retrospective analysis [published online ahead of print, 2020 Jun 10]. *J Thromb Thrombolysis*. 2020;1-10. doi:10.1007/s11239-020-02171-y.
30. Bates SM. D-dimer assays in diagnosis and management of thrombotic and bleeding disorders. *Semin Thromb Hemost*. 2012;38(7):673-682. doi:10.1055/s-0032-1326782
31. Trivedi P, Cheeseman P, Mowat AP. Serum hyaluronic acid in healthy infants and children and its value as a marker of progressive hepatobiliary disease starting in infancy. *Clin Chim Acta*. 1993;215(1):29-39. doi:10.1016/0009-8981(93)90246-z.
32. Tan W, Aboulhosn J. The cardiovascular burden of coronavirus disease 2019 (COVID-19) with a focus on congenital heart disease. *Int J Cardiol*. 2020;309; 7077. doi: 10.1016/j.ijcard.2020.03.063.
33. Tunuguntla H, Jeewa A, Denfield SW. Acute Myocarditis and Pericarditis in Children. *Pediatr Rev*. 2019;40(1):14-25. doi:10.1542/pir.2018-0044.
34. Harwood R, Allin B, Jones C et al. A national consensus management pathway for paediatric inflammatory multisystem syndrome temporally associated with COVID-19 (PIMS-TS): results of a national Delphi process. *Lancet Child Adolesc Health*. 2020 Published Online September 18 doi.org/10.1016/S352-4642(20)30304-7
35. Davis AL, Carcillo JA, Aneja RK, et al. American College of Critical Care Medicine Clinical Practice Parameters for Hemodynamic Support of Pediatric and Neonatal Septic Shock. *Crit Care Med*. 2017; 45(6):1061-93.

- 1  
2  
3 36. Wip C, Napolitano L. Bundles to prevent ventilator-associated pneumonia: how  
4 valuable are they? *Curr Open Infect Dis*. 2009; 22(2):159-66.  
5  
6 37. Kohn Loncarica G, Fustiñana A, Jabornisky R. Recommendations for the  
7 management of pediatric septic shock in the first hour (part I). *Arch Argent Pediatr*  
8 2019;117(1): e14-e23.  
9  
10 38. Kaushik S, Aydin SI, Derespina KR, et al. Multisystem Inflammatory Syndrome in  
11 Children (MIS-C) Associated with SARS-CoV-2 Infection: A Multi-institutional Study  
12 from New York City [published online ahead of print, 2020 Jun 14]. *J Pediatr*.  
13 2020;S0022-3476(20)30747-239.  
14  
15 39. National Institute for Health and Care Excellence. Sepsis: Recognition, Diagnosis and  
16 Early Management. London, 2016;51. [Accessed on: June 27th, 2020]. Available at:  
17 [https://www.nice.org.uk/guidance/ng51/resources/sepsis-recognition-diagnosis-and-](https://www.nice.org.uk/guidance/ng51/resources/sepsis-recognition-diagnosis-and-early-manage-ment-pdf-1837508256709)  
18 [early-manage-ment-pdf-1837508256709](https://www.nice.org.uk/guidance/ng51/resources/sepsis-recognition-diagnosis-and-early-manage-ment-pdf-1837508256709).  
19  
20 40. Ramcharan, T, Nolan, O, Lai C.Y. et al. Paediatric Inflammatory Multisystem  
21 Syndrome: Temporally Associated with SARS-CoV-2 (PIMS-TS): Cardiac Features,  
22 Management and Short-Term Outcomes at a UK Tertiary Paediatric Hospital. *Pediatr*  
23 *Cardiol* (2020). <https://doi.org/10.1007/s00246-020-02391-2>.  
24  
25 41. Fernández-Sarmiento J, Carcillo JA, Salinas CM, et al. Effect of a sepsis educational  
26 intervention on hospital stay. *Pediatr Crit Care Med*. 2018;19: e321–e328.  
27  
28 42. American College of Rheumatology. Clinical Guidance for Pediatric Patients with  
29 multisystem inflammatory syndrome in children (MIS-C) associated with SARS-CoV-2  
30 and hyperinflammation in covid-19. Available in  
31 <https://www.rheumatology.org/announcements#PediatricClinicalGuidance>. Jun3 17  
32 2020.  
33  
34 43. Low-cost dexamethasone reduces death by up to one third in hospitalized patients  
35 with severe respiratory complications of COVID-19 [Internet]. RECOVERY  
36 (Randomised Evaluation of COVID-19 Therapy) University of Oxford. 2020 [cited 2020  
37 Jun 18]. Available from: [https://www.recoverytrial.net/news/low-cost-dexamethasone-](https://www.recoverytrial.net/news/low-cost-dexamethasone-reduces-death-by-up-to-one-third-in-hospitalised-patients-with-severe-respiratory-complications-of-covid-19)  
38 [reduces-death-by-up-to-one-third-in-hospitalised-patients-with-severe-respiratory-](https://www.recoverytrial.net/news/low-cost-dexamethasone-reduces-death-by-up-to-one-third-in-hospitalised-patients-with-severe-respiratory-complications-of-covid-19)  
39 [complications-of-covid-19](https://www.recoverytrial.net/news/low-cost-dexamethasone-reduces-death-by-up-to-one-third-in-hospitalised-patients-with-severe-respiratory-complications-of-covid-19).  
40  
41 44. Rajasekaran S, Kruse K, Kovey K, et al. Therapeutic role of anakinra, an interleukin-1  
42 receptor antagonist, in the management of secondary hemophagocytic  
43 lymphohistiocytosis/ sepsis/multiple organ dysfunction/macrophage activating syndrome  
44 in critically ill children. *Pediatr Crit Care Med* 2014;15(5):401–8.

- 1  
2  
3 45. Toubiana J, Poiralut C, Corsia A et al. Kawasaki-like multisystem inflammatory  
4 syndrome in children during the covid-19 pandemic in Paris, France: prospective  
5 observational study. *BMJ* 2020;369m2094.  
6  
7  
8 46. Pouletty M, Borocco C, Ouldali N et al. Paediatric multisystem inflammatory  
9 syndrome temporally associated with SARS-CoV-2 mimicking Kawasaki disease (Kawa-  
10 COVID-19): a multicentre cohort. *Ann Rheum Dis* 2020; 0:1-8.  
11  
12 47. Capone CA, Subramony A, Sweberg T et al. Characteristics, Cardiac involvement,  
13 and Outcomes of Multisystem Inflammatory Disease of Childhood (MIS-C) Associated  
14 with SARS-CoV-2 Infection, *The Journal of Pediatrics* (2020), doi:  
15 <https://doi.org/10.1016/j.jpeds.2020.06.044>.  
16  
17 48. Feldstein L.R, Rose E.B, Horwitz J.P et al. Multisystem Inflammatory Syndrome in  
18 U.S. Children and Adolescents. *N Engl J Med* 2020 June 29.  
19 Doi:10.1056/NEJMoa2021680.  
20  
21 49. Dufort E, Koumnas E, Chow E et al. Multisystem Inflammatory Syndrome in  
22 Children in New York State. *N Engl J Med* 2020 Jun 29. Doi:10.1056/NEJMoa2021756  
23  
24  
25  
26  
27  
28  
29  
30  
31  
32  
33  
34

35 *Figure 1.* Selection process. We followed the PRISMA guidelines for reporting in  
36 systematic reviews and meta-analyses  
37  
38  
39  
40

41 *Table 1.* Demographic characteristics of patients with PIMS-TS  
42  
43

44 *Table 2.* Clinical and echocardiographic findings, and treatments instituted in the  
45 described series of PIMS-TS patients (*supplementary file*).  
46  
47  
48

49 *Table 3.* RCPCH, CDC and WHO Definition Criteria for Paediatric Inflammatory  
50 Multisystem Syndrome Temporally associated with COVID-19  
51  
52  
53  
54  
55  
56  
57  
58  
59  
60

**Figure 1.** Selection process. We followed the PRISMA guidelines for reporting in systematic reviews and meta-analyses

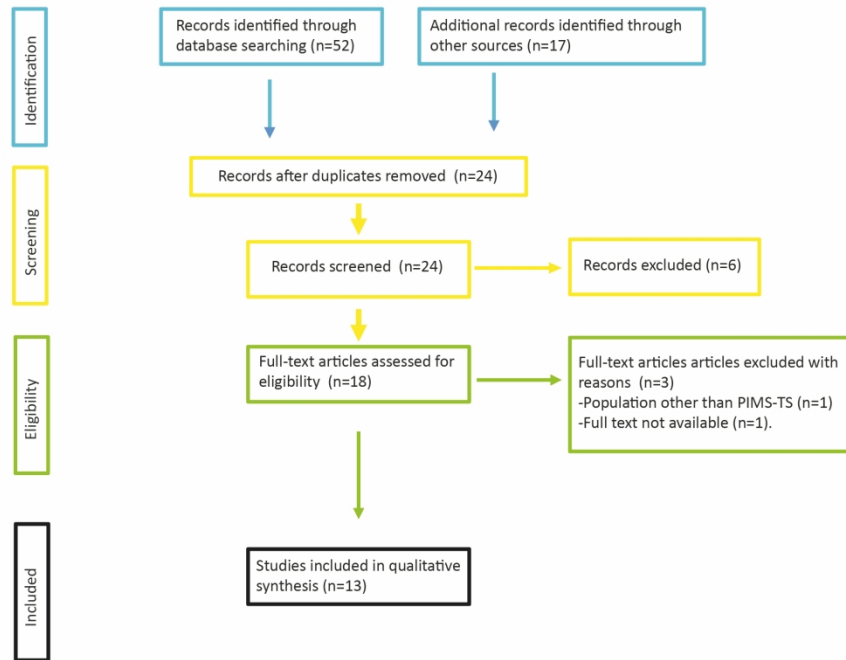



| Author                     | Clinical presentation                                                                                                                                                                                                                                                                                         | ECHO                                                                                                                                                                          | SARS-CoV-2 test                                                                                                                 | Organ support                                                                                                               | Treatment                                                                                      | Outcome / Died                                        |
|----------------------------|---------------------------------------------------------------------------------------------------------------------------------------------------------------------------------------------------------------------------------------------------------------------------------------------------------------|-------------------------------------------------------------------------------------------------------------------------------------------------------------------------------|---------------------------------------------------------------------------------------------------------------------------------|-----------------------------------------------------------------------------------------------------------------------------|------------------------------------------------------------------------------------------------|-------------------------------------------------------|
| <b>Riphagen et al [6]</b>  | Fever 8/8<br>Diarrhoea 7/8<br>Abdominal pain 6/8<br>Vomiting 4/8<br>Conjunctivitis 5/8<br>Rash 4/8<br>Vasoplegic shock 8/8                                                                                                                                                                                    | 7/8 ventricular dysfunction<br>Echobright coronary vessels<br>1/8 giant coronary aneurysm                                                                                     | SARS-CoV-2 negative 5/8<br>SARS-CoV-2 positive 2/8<br>Family exposure 4/8                                                       | Inotropic/vasopressor support 8/8, MV 5/8, HFNC 1/8, NIV 3/8, RRT 1/8, VA-ECMO 1/8 (arrhythmia with refractory shock, died) | IVIg 8/8, Corticoids 5/8<br>Aspirin 3/8, Heparin 1/8,<br>Antibiotics 8/8, Infliximab 1/8       | 1 died<br>6/8 alive<br>PICU length of stay 3 – 7 days |
| <b>Verdoni et al [7]</b>   | Classic form of Kawasaki 50%, Incomplete form of Kawasaki disease 50%<br>Kdss and MAS 50%<br>Diarrhoea 60%<br>Meningeal signs 40%<br>Drowsiness 10%                                                                                                                                                           | <b>Anormal ECHO 60%</b><br><b>Aneurism 10%</b><br><b>FEVE &lt; 50% – 50%</b><br>Mitral valve regurgitation 10%<br>Pericardial effusion 40%                                    | RT-PCR SARS-CoV-2 + 20%<br>Serology for SARS-CoV-2 antibodies – 80% were IgG +, and 3 were also IgM +                           |                                                                                                                             | Inotropic support 20%<br>Adjunctive steroid treatment 80%<br>IVIg 100%<br>Aspirin 20%          | None                                                  |
| <b>Whittaker et al [3]</b> | Fever 100%, Headache 26%, Vomiting 45%<br>Diarrhea 52%, Abdominal pain 53%, Rash 52%<br>Conjunctivitis 45%<br>Lymphadenopathy 16%<br>Mucus membrane, changes/red cracked lips 29%<br>Swollen hands and feet 16%, Respiratory symptoms 21%.<br><b>Fever + elevated inflammatory markers – 40%, Shock - 50%</b> | Left ventricular dysfunction 62% (18/29)<br>Abnormally dilated coronary arteries (z score >2) 8/55<br>Giant coronary artery aneurysms 2<br>Coronary artery aneurism 14% (n=8) | RT-PCR SARS-CoV-2 + 26%<br>IgG antibody SARS-CoV-2 + 87%<br>78% had evidence of current or prior SARS-CoV-2 infection           | PICU 50%<br>Acute kidney injury 22%<br>Shock + inotropic support 47%<br>MV 43%<br>ECMO 5%                                   | Inotropic support 47%<br>IVIg 71%<br>Corticosteroids 64%<br>Anakinra 5%<br>Infliximab 14%      | Death 2%                                              |
| <b>Grimaud et al [9]</b>   | Fever 100%, Abdominal pain 100%, Rash 50%,<br>Conjunctivitis 30%,<br>Adenitis 20%,<br>Tachycardia 100%<br>Hypotension 100% (75% clinical signs of                                                                                                                                                             | LVEF 35% (IQR 25-55)                                                                                                                                                          | SARS-CoV-nasopharyngeal swabs + 50% SARS-CoV-2 antibodies + 100% (15/15), <b>95% had identified SARS-CoV-2 infection on PCR</b> | NIV 55%, IMV 40%, HFNO 5%, Respiratory support in all patient was indicated for hemodynamic support                         | IVIg 100%, Corticosteroids 10%, Anakinra 5%, Tocilizumab 5%, Inotropic/vasopressor support 95% | None                                                  |

|                            | vasoplegia)                                                                                                                                                                                                                                                                    |                                                                                                                                                                          | and/or by serology                                                                                                                         |                                                           |                                                                                                                                       |      |
|----------------------------|--------------------------------------------------------------------------------------------------------------------------------------------------------------------------------------------------------------------------------------------------------------------------------|--------------------------------------------------------------------------------------------------------------------------------------------------------------------------|--------------------------------------------------------------------------------------------------------------------------------------------|-----------------------------------------------------------|---------------------------------------------------------------------------------------------------------------------------------------|------|
| <b>Belhadjer et al [8]</b> | Asthenia 100%<br>Fever 100%<br>GI symptoms 83%<br>(2 children underwent emergency operation for suspected appendicitis)<br>Respiratory distress 65%<br>Rhinorrhea 43%<br>Adenopathy 60%<br>Rash 57%<br>Meningism 31%<br>At admission to the ICU, 80% were in cardiogenic shock | Coronary artery dilatation (z score > 2) 17%<br>Aneurysm 0<br>LVEF < 30% - 28%<br>LVEF 30-50% - 72%                                                                      | SARS-CoV-2 was confirmed 88.5%<br>RT-PCR-SARS-CoV-2 + 34%<br>Fecal PCR 6%<br>Antibodies + 86%                                              | Respiratory support 94% (IMV 62%; NIV 32%)<br>VA-ECMO 28% | Inotropic support 80%<br>IVIG 71%<br>Corticosteroids 34%<br>Anakinra 8%<br>Anticoagulation with heparin 65%                           | None |
| <b>Cheung et al [13]</b>   | Fever 100% GI symptoms 88% Shock at presentation 76% Rash 71%,<br>Conjunctivitis 65%<br>Lip redness/swelling 65%<br>Neurologic symptoms 47%, Respiratory symptoms 41%, Myalgia 35%, Lymphadenopathy 35%, Hypoxia 18%<br>Criteria for KD 47%<br>Incomplete Kawasaki 29%         | FEVE mildly decreased 29%<br>FEVE mild-moderately decreased 24%<br>FEVE moderate-severely decreased 12%<br>Pericardial effusion 47%                                      | RT-PCR SARS-CoV-2 + 47%<br>Serology for SARS-CoV-2 antibodies -+ 53%                                                                       | PICU 88%                                                  | IVIG 76%<br>Methylprednisolone 71%<br>Hydrocortisone 21%<br>Enoxaparin prophylaxis 59%<br>Enoxaparin treatment 6%<br>Aspirin 24%      | None |
| <b>Toubiana et al [45]</b> | Recent history of viral-like symptoms was report in 43%<br>Median duration between these symptoms and the onset of signs and symptoms of Kawasaki disease was 45 days.<br>Complete presentation of                                                                             | Myocarditis 76% (LVFE range between 10 and 57%)<br>38% coronary artery abnormalities: 24% which consisted of dilations (z score between 2.0 and 2.5); 14% with increased | History of recent contact with people with viral-like symptoms was + in 48%<br>Median interval between reported contact and KD was 36 days | PICU 81%<br>Vasoactive agents 71%<br>MV 52%               | IVIG 100% (24% needed a second dose)<br>Low dose aspirin (3-5mg/kg/day) 100%<br>Corticosteroids (2-10mg/kg/day) 48%<br>Antibiotic 86% | None |

|                             |                                                                                                                                                                                                                                                                              |                                                                                                                                                      |                                                                                                                                                               |                                                                       |                                                                                                                                                                                                                                                         |          |
|-----------------------------|------------------------------------------------------------------------------------------------------------------------------------------------------------------------------------------------------------------------------------------------------------------------------|------------------------------------------------------------------------------------------------------------------------------------------------------|---------------------------------------------------------------------------------------------------------------------------------------------------------------|-----------------------------------------------------------------------|---------------------------------------------------------------------------------------------------------------------------------------------------------------------------------------------------------------------------------------------------------|----------|
|                             | KD 52%, Abdominal symptoms 95%, Lips and oral cavity changes 76%<br>Conjunctivitis 81%<br>Rash 76%, Changes to extremities 48%<br>Lymphadenopathy 57%                                                                                                                        | coronary visibility<br>No coronary aneurysms were identified                                                                                         | RT-PCR-SARS-CoV-2 + 38%<br>IgG antibodies SARS-CoV-2 + 90%<br>9,5% negative Serology and PCR)                                                                 |                                                                       |                                                                                                                                                                                                                                                         |          |
| <b>Kaushik et al [38]</b>   | Fever 93%, Abdominal pain 63%, Nausea/emesis 69%, Diarrhea 48%<br>Hypotension 63%, Mucocutaneous involvement 21%<br>Conjunctivitis 36%<br>Rash 42%, Shortness of breath 33%<br>Neurologic involvement 12%                                                                    | Pericardial effusion 46%<br>LVEF median 46.6 (IQR 39.5, 52.8)<br>LVEF < 30%: 12%<br>LVEF 30-50%: 53%<br>Recovered LV function prior to discharge 95% | SARS-CoV-2 antibody + 81%<br>RT-PCR SARS-CoV-2 + 33%<br>18% tested + for both                                                                                 | NIV 36%<br>IMV 15%<br>ECMO 3%<br>Intra-aortic balloon pump support 3% | IVIG 54%, Corticosteroids 51%, Tocilizumab 36%<br>Remdesivir 21%, Anakinra 12%, Convalescent plasma therapy 3%, Aspirin 24%<br>Anticoagulation, prophylaxis 15%, Anticoagulation, therapeutic 81%<br>Antibiotics > 48h 45%<br>Vasopressor/inotropes 51% | Death 3% |
| <b>Pouletty et al [46]</b>  | Fever 100%<br>Respiratory signs 12%<br>GI signs 81%<br>Anosmia 6%<br>Neurological signs 56%<br>Rash 81%<br>Conjunctivitis 94%<br>Hands and feet edema/erythema 68%<br>Dry cracked lips 87%<br>Lymphadenopathy 37%<br>Haemodynamic failure 69%<br>Complete KD 62%<br>KDSS 44% | Abnormal ECHO 69%<br>Coronary dilatation 19% (median z score 2.6)<br>No aneurysm<br>Myocarditis 44% (median LVEF 35%)<br>Pericarditis 25%            | Family c/s COVID-19 infection 75%<br>First infectious exposure-hospitalization 21 days (IQR 21-24)<br>RT-PCR-SARS-CoV-2 all sites + 69%<br>Serology IgG + 87% |                                                                       | IVIG 93% (Second infusion 335)<br>Steroids 25%<br>Anakinra 6%<br>Tocilizumab 6%<br>AAS (30-50mg/kg) 52%<br>AAS anti-aggregant dose 50%                                                                                                                  | None     |
| <b>Ramcharan et al [40]</b> | Fever 100%<br>GI symptoms 87%<br>Incomplete KD 53%                                                                                                                                                                                                                           | 93% coronary artery abnormalities<br>LVEF median on                                                                                                  | 13% described typical COVID-19 symptoms in the previous two                                                                                                   | Respiratory support 53%<br>Inotrope or vasopressor                    | IVIG 67% (10/15), of whom 2 received a second dose<br>Methylprednisolone 33%                                                                                                                                                                            | None     |

|                                     |                                                                                                                                                        |                                                                                                                                                            |                                                                                                                                                                                    |                                                                         |                                                                                                                                                           |                                                                                                                                          |
|-------------------------------------|--------------------------------------------------------------------------------------------------------------------------------------------------------|------------------------------------------------------------------------------------------------------------------------------------------------------------|------------------------------------------------------------------------------------------------------------------------------------------------------------------------------------|-------------------------------------------------------------------------|-----------------------------------------------------------------------------------------------------------------------------------------------------------|------------------------------------------------------------------------------------------------------------------------------------------|
|                                     |                                                                                                                                                        | admission 51%                                                                                                                                              | months<br>20% related contacted<br>with family member<br>with COVID-19                                                                                                             | 67%                                                                     | 73% werw discharged on<br>low dose aspirin<br>Antibiotic 100%                                                                                             |                                                                                                                                          |
| <b>Caponi et al<br/>[47]</b>        | Fever 100%<br>GI symptoms 97%<br>Neurocognitive symptoms<br>58%<br>Respiratory symptoms<br>52%<br>Shock 75%<br>Complete KD 64%<br>HD without shock 76% | Any coronary<br>abnormality 48%<br>(Z score $\geq 2.5$ – 15%;<br>Z score 2-2.49 – 9%)<br>Any dysfunction 58%:<br>(LVEF 45-54% - 33%;<br>LVEF 35-44% - 24%) | IgG + and Nucleic<br>acid amplification +<br>18%<br>IgG + and Nucleic<br>acid amplification<br>negative 73%<br>Nucleic acid<br>amplification +,<br>serology test<br>unavailable 9% | PICU 79%<br>MV 18%<br>Inotrope/vasopressor<br>support 76%               | IVIG 100%<br>2 <sup>nd</sup> dose IVIG 33%<br>Methylprednisolone 70%<br>Aspirin 88%<br>Anakinra 12%<br>Tocilizumab 9%<br>Infliximab 13%<br>Enoxaparin 42% | None                                                                                                                                     |
| <b>Feldstein L.R<br/>et al [48]</b> | Fever 100%<br>Bilateral conjunctival<br>injection 55%<br>Oral mucose changes 42%<br>Peripheral extremity<br>changes 37%<br>Rash 59%                    | Abnormal ECHO with<br>coronary-artery<br>aneurysms 9%                                                                                                      | RT-PCR or antibody<br>testing 70%                                                                                                                                                  | PICU 80%<br>MV 20%<br>Inotrope or vasopressor<br>support 48%<br>ECMO 4% | IVIG 77%<br>Secon dose 21%<br>Systemic glucocorticoid<br>49%<br>Interleukin-6 inhibitor 8%<br>Interleukin-1Ra inhibitor<br>13%<br>Anticoagulation 47%     | 28% were still<br>hospitalized as of<br>May 20,<br>2020, and 4<br>patients (2%)<br>died, 2 of whom<br>had<br>previously been<br>healthy. |

Abbreviations: MV: mechanical ventilation, HFNC: high flow nasal cannula, NIV:noninvasive ventilation, RRT:renal replacement therapy, VA-ECMO: venu-arterial extracorporeal membrane oxygenation, PCR: protein C reactive, IVIG: immunoglobulin, FEVE: fraction ejection ventricular, RT-PCR: real time polymerase chain reaction, PICU: pediatric intensive care unit, KD:Kawasaki disease

Table 2. Clinical findings, echocardiographic and treatments instituted in the described series of PIMS-TS

# BMJ Paediatrics Open

## Paediatric Inflammatory Multisystem Syndrome Temporally associated with COVID-19 (PIMS-TS): a narrative review and the viewpoint of the Latin American Society of Pediatric Intensive Care (SLACIP) Sepsis Committee

|                               |                                                                                                                                                                                                                                                                                                                                                                                                                                                  |
|-------------------------------|--------------------------------------------------------------------------------------------------------------------------------------------------------------------------------------------------------------------------------------------------------------------------------------------------------------------------------------------------------------------------------------------------------------------------------------------------|
| Journal:                      | <i>BMJ Paediatrics Open</i>                                                                                                                                                                                                                                                                                                                                                                                                                      |
| Manuscript ID                 | bmjpo-2020-000894.R1                                                                                                                                                                                                                                                                                                                                                                                                                             |
| Article Type:                 | Review                                                                                                                                                                                                                                                                                                                                                                                                                                           |
| Date Submitted by the Author: | 24-Nov-2020                                                                                                                                                                                                                                                                                                                                                                                                                                      |
| Complete List of Authors:     | Fernández-Sarmiento, Jaime ; Fundación Cardioinfantil Instituto de Cardiología, ; Universidad de La Sabana, De Souza, Daniela; Universidade de Sao Paulo Hospital Universitario de Sao Paulo<br>Jabornisky, Roberto; Universidad Nacional del Nordeste<br>Gonzalez , Gustavo Ariel ; Hospital Churruca Visca<br>Arias López, Maria del Pilar ; Ricardo Gutierrez Children's Hospital<br>Palacio , Gladys ; Ricardo Gutierrez Children's Hospital |
| Keywords:                     | Mortality, Pathology, Syndrome, Virology, Therapeutics                                                                                                                                                                                                                                                                                                                                                                                           |
|                               |                                                                                                                                                                                                                                                                                                                                                                                                                                                  |

SCHOLARONE™  
Manuscripts



I, the Submitting Author has the right to grant and does grant on behalf of all authors of the Work (as defined in the below author licence), an exclusive licence and/or a non-exclusive licence for contributions from authors who are: i) UK Crown employees; ii) where BMJ has agreed a CC-BY licence shall apply, and/or iii) in accordance with the terms applicable for US Federal Government officers or employees acting as part of their official duties; on a worldwide, perpetual, irrevocable, royalty-free basis to BMJ Publishing Group Ltd ("BMJ") its licensees and where the relevant Journal is co-owned by BMJ to the co-owners of the Journal, to publish the Work in this journal and any other BMJ products and to exploit all rights, as set out in our [licence](#).

The Submitting Author accepts and understands that any supply made under these terms is made by BMJ to the Submitting Author unless you are acting as an employee on behalf of your employer or a postgraduate student of an affiliated institution which is paying any applicable article publishing charge ("APC") for Open Access articles. Where the Submitting Author wishes to make the Work available on an Open Access basis (and intends to pay the relevant APC), the terms of reuse of such Open Access shall be governed by a Creative Commons licence – details of these licences and which [Creative Commons](#) licence will apply to this Work are set out in our licence referred to above.

Other than as permitted in any relevant BMJ Author's Self Archiving Policies, I confirm this Work has not been accepted for publication elsewhere, is not being considered for publication elsewhere and does not duplicate material already published. I confirm all authors consent to publication of this Work and authorise the granting of this licence.

1  
2  
3  
4  
5  
6  
7  
8  
9  
10  
11  
12  
13  
14  
15  
16  
17  
18  
19  
20  
21  
22  
23  
24  
25  
26  
27  
28  
29  
30  
31  
32  
33  
34  
35  
36  
37  
38  
39  
40  
41  
42  
43  
44  
45  
46  
47  
48  
49  
50  
51  
52  
53  
54  
55  
56  
57  
58  
59  
60

**Paediatric Inflammatory Multisystem Syndrome Temporally associated with COVID-19 (PIMS-TS): a narrative review and the viewpoint of the *Latin American Society of Pediatric Intensive Care (SLACIP) Sepsis Committee***

Jaime Fernández-Sarmiento MD PhD(c)<sup>1,6</sup>, Daniela Carla de Souza MD PhD<sup>2,6</sup>, Roberto Jabornisky MD<sup>3,6</sup>, Gustavo Ariel González MD<sup>4,5,6</sup>, María del Pilar Arias López MD<sup>5,6</sup>, Gladys Palacio MD<sup>5,6</sup>.

1 Department of Critical Care Medicine and Pediatrics, Universidad de la Sabana, Fundación Cardioinfantil - Instituto de Cardiología. CES Graduate School. Bogotá Colombia.

2 Pediatric Intensive Care Unit and Department of Pediatrics, Hospital Universitario da Universidad de São Paulo and Hospital Sírio Libanês, Sao Paulo, Brazil.

3 Department of Pediatrics. Facultad de Medicina. Universidad Nacional del Nordeste. Argentina.

4 Pediatric Intensive Care Unit. Hospital Churruca - Visca Medical Complex. Buenos Aires. Argentina.

5 Pediatric Intensive Care Unit. Ricardo Gutiérrez Children's Hospital, Buenos Aires, Argentina.

6 Sepsis Committee. Latin American Society of Pediatric Intensive Care (SLACIP).

Corresponding author: Jaime Fernández-Sarmiento, MD. Universidad de La Sabana, Campus del Puente del Común, Km 7 Autopista Norte de Bogotá, Chía - Cundinamarca - Colombia - South America. JaimeFe@unisabana.edu.co. + 057-16672727 ext 2204.

**Abstract**

*Background:* In this review, we discuss some important aspects of Paediatric Inflammatory Multisystem Syndrome Temporally associated with COVID-19 (PIMS-TS), a new syndrome that is temporally related to previous exposure to severe acute respiratory syndrome coronavirus 2 (SARS-CoV-2) infection. This virus has a broad spectrum of presentation which may overlap with Kawasaki disease (aKD) in terms of presenting symptoms, and laboratory and cardiac findings. Our objective was to review

1  
2  
3 and summarise published evidence regarding the most important aspects of PIMS-TS,  
4 with special emphasis on the treatment strategies suggested for middle- and low-income  
5 countries.  
6  
7  
8  
9

10 *Methods:* A systematic review of the literature was performed in the principal medical  
11 databases including PUBMED, EMBASE (OVID) and Google Scholar between  
12 December 2019 and August 2020.  
13  
14  
15

16  
17 *Results:* A total of 69 articles were identified in the described databases. Altogether, 13  
18 articles met the inclusion criteria and were eligible. The most frequently described  
19 symptoms of PIMS-TS include fever (82%), shock (67%), and gastrointestinal (87%),  
20 skin (71%) and cardiac disorders (75%). In most series, it has been observed between 4-  
21 6 weeks after the pandemic appears in the general population. Multisystem inflammatory  
22 syndrome in children is presented as a great systemic inflammatory response syndrome  
23 (SIRS), which sometimes presents as shock requiring fluid resuscitation and vasoactive  
24 drug support (26%). Several treatment strategies have been used, including  
25 immunoglobulin, steroids, aspirin, anakinra and anticoagulation, among others. These  
26 general and specific interventions should be guided by an inter- and multi-disciplinary  
27 team, especially in settings with limited resources.  
28  
29  
30  
31  
32  
33  
34  
35  
36

37 *Conclusions:* PIMS-TS COVID-19 is a new type of presentation of SARS-CoV-2  
38 infection, with an exaggerated inflammatory response and frequent *-but not exclusive-*  
39 digestive and myocardial involvement. It is important to describe the clinical course and  
40 outcomes in countries with limited resources as well as establish the role of biomarkers  
41 for early diagnosis, effective therapeutic strategies, and outpatient follow-up schemes.  
42  
43  
44  
45

46 *Key words:* septic shock, COVID-19, inflammation, immunoglobulin, Kawasaki disease,  
47 thrombosis, SARS-CoV-2  
48  
49  
50  
51

### 52 **What is known about the subject?**

53 -PIMS-TS is a type of presentation of SARS-CoV-2 infection which produces a ten times  
54 greater need for hospitalization and mortality in children than other COVID-19  
55 presentations.  
56  
57

58 -It is characterized by fever, shock and gastrointestinal, skin and cardiac involvement,  
59 with prior positive real-time polymerase chain reaction (RT-PCR) or antibody tests.  
60



1  
2  
3 -The diagnostic and treatment approach should be aimed at initial stabilization and shock  
4 management, especially in countries with limited resources. The specific treatment  
5 includes immunomodulators.  
6  
7  
8  
9

### 10 **What does this study add?**

11 For this SARS-CoV2 disease, which mainly affects children, a comprehensive approach  
12 is suggested which may be applied under the various healthcare system access conditions,  
13 including strategies geared towards middle- and low-income countries. This treatment  
14 includes general stabilization and shock management measures as well as the specific  
15 immunomodulatory therapy currently recommended based on the available evidence.  
16  
17  
18  
19  
20  
21

## 22 **INTRODUCTION**

23 In December 2019, a new viral infection was reported, causing severe respiratory  
24 infection and very high mortality. According to its genetic sequencing, this virus belongs  
25 to the genus *Beta coronavirus*, closely related to the severe acute respiratory syndrome  
26 (SARS) virus. It was named SARS-CoV-2 and its disease COVID-19.<sup>1,2</sup>  
27  
28

29 Healthcare systems worldwide have been deeply concerned, given SARS-CoV-2's high  
30 transmissibility, severity and lethality, particularly in the population over the age of 60.<sup>1</sup>  
31 Patients with major comorbidities such as heart disease, diabetes, hypertension, or obesity  
32 have an increased risk of dying.<sup>1,2</sup> Moreover, mortality has been associated with multiple  
33 organ failure (MOF) as the common final pathway for pneumonia, sepsis, and acute  
34 respiratory distress syndrome (ARDS). COVID-19 is usually less severe in paediatric  
35 patients. In general, 80-90% of children with SARS-CoV-2 infection are asymptomatic  
36 or have a mild infection. However, between 4 -10% of hospitalized children may need to  
37 be transferred to a paediatric intensive care unit (PICU), and mortality ranges from 0.1%  
38 to 8%.<sup>3,4</sup> Recently, the Critical Coronavirus and Kids Epidemiology (CAKE) study  
39 reported a mortality rate of 5% in children hospitalized in critical care in five European  
40 and American countries (Chile, Colombia, Italy, Spain and USA), with 76% of cases  
41 having severe pneumonia as their main manifestation.<sup>4</sup>  
42  
43  
44  
45  
46  
47  
48  
49  
50  
51  
52

53 Several pathophysiological factors may explain these features. COVID-19 non-survivors  
54 have higher serum ferritin, D-dimer and C-reactive protein (CRP) than those who survive,  
55 indicating an intense inflammatory response<sup>2</sup>. Recently, a new type of presentation of  
56 SARS-CoV-2 infection has been described in children, involving this significant  
57 inflammatory response. This new disease has been called Paediatric Inflammatory  
58  
59  
60

1  
2  
3 Multisystem Syndrome Temporally associated with COVID-19 (PIMS-TS), a new  
4 syndrome that is temporally related to previous exposure to severe acute respiratory  
5 syndrome coronavirus 2 (SARS-CoV-2) infection. This is a severe presentation of the  
6 virus in children and requires early detection to avoid its progression and potentially  
7 unsatisfactory outcomes<sup>5</sup>. In this article, we discuss and review the most relevant aspects  
8 of PIMS-TS described to date.  
9  
10  
11  
12

## 13 **METHODS**

### 14 **Search strategy and article selection**

15  
16  
17 A systematic review of the literature was performed in the principal medical databases  
18 including PUBMED, EMBASE (OVID) and Google scholar, using the MeSH terms  
19 (“SARS-CoV-2” OR “Covid-19” OR “coronavirus” OR “infection” OR “sepsis” OR  
20 “covid-19” OR “critical care”) AND “Multisystem Inflammatory Syndrome in Children”  
21 OR “MIS-C” OR “PIMS-TS” between December 2019 and August 2020. The descriptors  
22 were validated in DecS (descriptors in health science) and MeSH (medical subject  
23 headings). Grey literature or as yet unpublished documents were not included.  
24  
25  
26  
27  
28  
29  
30  
31  
32

### 33 **Eligibility criteria**

34 Articles which reported at least five cases of PIMS-TS, including case series, case reports,  
35 and cross-sectional, case-control, cohort (either prospective or retrospective) or clinical  
36 trial studies, were included. Studies of critically ill children with COVID-19 were also  
37 considered, and the cases of PIMS-TS reported in these studies were explored. Other  
38 inclusion criteria were articles which described important outcomes such as mortality,  
39 complications, laboratory findings and treatment received. In addition, articles in English,  
40 Spanish or Portuguese were included. No reports of PIMS-TS in low and middle-income  
41 countries were found in indexed journals. The World Health Organization (WHO),  
42 Centers for Disease Control (CDC) and Royal College guidelines were consulted for the  
43 definitions. Articles which did not provide complete data when reporting general cases  
44 of critically ill children with COVID-19, or those for which the full text was not available,  
45 as well as narrative reviews, were excluded. Adult cases have already been described, but  
46 these were not included in this review.  
47  
48  
49  
50  
51  
52  
53  
54  
55  
56  
57  
58  
59  
60

### Study selection and data collection process

First, the inclusion and exclusion criteria for this systematic review were defined, after which one of the researchers (JFS) performed the systematic search of the literature and reviewed the most relevant articles. The established criteria were applied, and the articles were approved by all the SLACIP sepsis committee authors. In case of doubt, or a lack of consensus regarding the inclusion of an article, a second reviewer (RJ) was consulted to decide. Any discrepancies or missing data were resolved by consensus. Preferred Reporting Items for Systematic Reviews and Meta-Analysis (PRISMA) guidelines were followed. (*Figure 1*).

### Patient and Public Involvement statement

No patients participated actively in this review. The data were taken from the most important publications to date on PIMS-TS, including consensus recommendations for high-income countries. It is expected that this information will be disseminated through SLACIP and its various committees for applicability in patients living in middle- and low-income countries.

## RESULTS

### Search and study selection results

A total of 69 articles were identified in the described databases. After eliminating the duplicates and reviews, 13 articles met the inclusion criteria and were eligible. These articles were included in the qualitative synthesis and the most relevant ones which do not include patients reported in other case series are described by their characteristics in *Table 1*.

Although the main pathogenesis of COVID-19 may be similar to other viruses such as influenza, it has shown some clinical presentations which are different from those usually found in those classical respiratory viruses. On April 24, 2020, a new presentation of SARS-CoV-2 in children was described by Riphagen et al. in the United Kingdom.<sup>6</sup> The first report described a cohort of eight children with COVID-19 who required hospitalization in intensive care and had an unusual clinical behavior characterized by a severe hyperinflammatory state, with clinical similarity between all eight patients.<sup>7-9</sup>

The Royal College of Paediatrics and Child Health called this new entity PIMS-TS.<sup>10</sup> Subsequently, the CDC and WHO called it multisystem inflammatory syndrome in

1  
2  
3 children (MIS-C).<sup>11,12</sup> In general, both terms refer to the same entity and the latter name  
4 has been the most frequently used in the main descriptions of this disease (*Table 3*).

5  
6 The largest series described to date is that of the CDC in Atlanta, with 570 patients. Using  
7 a latent class analysis (LCA) statistical model, it attempted to divide the cases into three  
8 large groups according to their common clinical characteristics.<sup>13</sup> Class I included those  
9 with symptoms which could overlap with macrophage activation syndrome, with a large  
10 inflammatory response. Class II had predominantly respiratory involvement and signs  
11 suggestive of active COVID-19 disease with a high rate of RT-PCR seropositivity (84%).  
12 Class III had clinical manifestations that could overlap with Kawasaki disease, and only  
13 2% were RT-PCR positive.<sup>13</sup>  
14  
15  
16  
17  
18  
19  
20  
21

22 In this regard, most studies report that the patients have a negative RT-PCR and positive  
23 antibody or serology tests. In fact, a negative RT-PCR has been found in 40% of patients  
24 with positive antibody tests. Although RT-PCR is an imperfect test, it is considered the  
25 gold standard today. In the described series, 46% of the cases had a positive serology and  
26 a negative RT-PCR, which suggests that, in these patients, the infection occurred possibly  
27 weeks earlier. An average of 25% of the patients in the included studies had both positive  
28 serology and positive RT-PCR (*supplementary table 2*).  
29  
30  
31  
32  
33  
34  
35  
36  
37

## 38 **DISCUSSION**

39 PIMS-TS is characterized by a very significant ongoing inflammatory response, in  
40 crescendo, which in fact has been the key element in the Atlanta CDC (May 14<sup>th</sup>) and  
41 WHO (May 15<sup>th</sup>) definitions (*Table 3*).<sup>11,12</sup> Characteristically, these patients present with  
42 high leukocytosis, CRP, procalcitonin (PCT), and serum ferritin.<sup>13</sup> Hoang et al.<sup>14</sup> reported  
43 lower expression of circulating CD16+CD56+ natural killer cells and more profound  
44 lymphopenia in children with PIMS-TS compare to those without PIMS-TS.  
45

46 Primarily, there is an initial innate immune response with the macrophages as the  
47 principal actors. From the pathophysiological point of view, it is striking that more than  
48 90% of children with PIMS-TS have elevated CRP and ferritin. C-reactive protein is an  
49 acute phase reactant that usually rises after six hours of an inflammatory state and is  
50 produced by hepatocytes and adipose tissue in response to IL-1, IL-6 and TNF- $\alpha$   
51 stimulation.<sup>15,16</sup> This acute phase reactant from the pentraxin family identifies  
52 phosphatidylserine on the surface of cells that have initiated a programmed cell death  
53  
54  
55  
56  
57  
58  
59  
60

1  
2  
3 pattern of apoptosis by activating the complement system. This biomarker is very useful  
4 for diagnosis and follow up, especially in middle and low-income countries (given its low  
5 cost), and should be considered on admission with subsequent follow up.  
6  
7

8 Additionally, a marked elevation of ferritin (2-10 times its normal value) has been  
9 observed in more than 90% of the series.<sup>13-17</sup> Ferritin is a protein that stores iron and  
10 releases it in a controlled fashion, but also in pathophysiologic conditions. Its levels can  
11 reflect macrophage response to free hemoglobin as well as DNA viruses, intracellular  
12 bacterial infections and parasites.<sup>18-20</sup> Ferritin can induce positive feedback inflammation,  
13 upregulating toll-like receptor 9 (TLR-9) which leads macrophage inflammasome IL-1  
14 and IL-18 to feed forward ferritin production. TLR-9 may also be stimulated by viral  
15 DNA, other infections and host damage-associated molecular patterns (DAMP).<sup>20</sup> This  
16 whole process generates a large number of inflammasomes and an enhanced  
17 inflammatory pathway, delivering the “cytokine storm.” This precipitate cell death with  
18 a pyroptosis pattern and new DAMPs that stimulate TLR-9.<sup>20</sup> This was described as  
19 “*Hyperferritinemic Syndrome*” by Rosario<sup>21</sup>.  
20  
21  
22  
23  
24  
25  
26  
27  
28  
29

30 Nevertheless, there is evidence of an unusual late adaptive immunity response. It has  
31 come to the researchers attention that PIMS-TS occurred between four and six weeks  
32 after the peak of cases reported as positive for SARS-CoV-2 in each country had been  
33 reached.<sup>13</sup> Pérez-Toledo M et al.<sup>22</sup> recently described eight patients with PIMS-TS with  
34 a negative RT-PCR but with significant elevation of IgG and IgA, and negative IgM.  
35 Additionally, they found elevated IgG1 and IgG3 in these children, which are  
36 immunoglobulin isotypes associated with serum supplement activation. This situation is  
37 consistent with highly elevated CRP related to COVID-19, which activates the  
38 complement system. The elevation of these immunoglobulins suggests that PIMS-TS  
39 occurs due to tissue damage induced by autoantibodies, a situation that has been described  
40 in other types of coronavirus infection.<sup>23-24</sup> We are not aware of any studies in middle  
41 and low-income countries which have described this serological behaviour. Studies are  
42 needed to help clear up this aspect, especially when all the diagnostic test options for  
43 SARS-CoV-2 are not always available. In these countries with limited resources, we  
44 suggest taking an initial RT-PCR. If this is negative and there is a high index of suspicion  
45 of PIMS-TS, due to the signs and symptoms, a total antibody or IgM/IgG test should be  
46 performed.<sup>24</sup>  
47  
48  
49  
50  
51  
52  
53  
54  
55  
56  
57  
58  
59  
60

1  
2  
3 For PIMS-TS, most of the series described coagulation disorders. Severe coagulopathy  
4 was seen in 70-80% of the cases (very high D-dimers, prolonged PT, PTT).<sup>13</sup> Like  
5 inflammation, coagulation is necessary for host defense. In addition, proinflammatory  
6 cytokines, monocytes / macrophages, neutrophil activation, and extracellular neutrophil  
7 traps (NETs) can foster local thrombosis. COVID-19 associated coagulopathy (CAC) is  
8 complex and in some ways pathophysiologically different from SIC.<sup>25,26</sup>  
9

10  
11  
12  
13  
14  
15 Cytokine levels of IL-1 $\beta$  and IL-6 are elevated, which induces thrombocytosis and  
16 hyperfibrinogenemia, and the angiotensin-converting enzyme 2 (ACE-2) receptor is  
17 stimulated by SARS-CoV-2, leading to a massive release of plasminogen activators.<sup>27, 28</sup>  
18 D-dimer levels are very high in PIMS-TS, but consumptive coagulopathy is rare in its  
19 early phase.<sup>28</sup> Elevated D-dimer levels can be present in a wide variety of inflammatory  
20 and prothrombotic conditions;<sup>29</sup> in COVID-19, these are probably more associated with  
21 inflammation than thrombosis.<sup>30</sup> Furthermore, serum hyaluronic acid, a key glycocalyx  
22 component, is higher during infancy, progressively diminishing over the years.<sup>19,31</sup> This  
23 could explain a more protected endothelium and a lower probability of a hypercoagulable  
24 state. In addition, CAC has an overlapping pathophysiology with other coagulopathies  
25 like hemophagocytic syndrome (HPS) / hemophagocytic lymphohistiocytosis (HLH),  
26 antiphospholipid syndrome (APS), and thrombotic thrombocytopenic purpura (TTP) /  
27 hemolytic uremic syndrome (HUS), but some unique aspects make it a probably new type  
28 of coagulopathy.<sup>32</sup>  
29  
30  
31  
32  
33  
34  
35  
36  
37  
38  
39  
40  
41  
42  
43  
44  
45  
46  
47  
48  
49  
50  
51  
52  
53  
54  
55  
56  
57  
58  
59  
60

| Author                           | City, Country                                      | Period                                         | Number | Age                                     | Gender     | Comorbidity                                     | Race                                                 | IMC kg/m <sup>2</sup>                                     |
|----------------------------------|----------------------------------------------------|------------------------------------------------|--------|-----------------------------------------|------------|-------------------------------------------------|------------------------------------------------------|-----------------------------------------------------------|
| <b>Whittaker et al [3]</b>       | London, UK                                         | March 23 and May 16                            | 58     | 9 years (IQR 5.7, 14)                   | 43% boys   | 7/58 Comorbidities                              | 69% black or Asian                                   | N/R                                                       |
| <b>Riphagen et al [6]</b>        | London, UK                                         | 10 days in mid-April                           | 8      | 4 – 14 years (range)                    | 5/8 boy    | None                                            | 6/8 Afro-Caribbean                                   | 14 – 33<br>7/8 > 75 <sup>th</sup><br>centile/weight       |
| <b>Verdoni et al [7]</b>         | Bergamo, Italy                                     | Feb 18 and April 20                            | 10     | 7.5 years (SD 3-5)                      | 7/10 boys  | N/R                                             | N/R                                                  | N/R                                                       |
| <b>Belhadjer et al [8]</b>       | France (12 hospitals) and Switzerland (1 hospital) | March 22 to April 30                           | 35     | 10 years (IQR 8.2, 12.4)                | 51% boys   | Comorbidities 28% (asthma 8.55; lupus 3%)       | N/R                                                  | Overweight 17%                                            |
| <b>Golfred-Cato S et al [13]</b> | Multicenter US                                     | March 01 to July 29                            | 570    | 8 (IQR 4,12)                            | 55.4% boys | Comorbidities 8%                                | 40.5% Hispanic and 33.1% Black Non-hispanic          | Obesity 25.6%                                             |
| <b>Cheung et al [33]</b>         | New York, US                                       | April 18 and May 5                             | 17     | 8 years (IQR 1.8, 16)                   | 47% boys   | Most were previously healthy (mild asthma in 3) | White 70%                                            | N/R                                                       |
| <b>Kaushik et al [38]</b>        | New York, US                                       | April 23 to May 23                             | 33     | 10 years (IQR 6, 13)                    | 61% boys   | Comorbidities 48%                               | 45% Hispanic/latino<br>39% black                     | Overweight 12%<br>Obesity (BMI > 30kg/m <sup>2</sup> ) 6% |
| <b>Ramcharan et al [40]</b>      | UK                                                 | 10 <sup>th</sup> April and 9 <sup>th</sup> May | 15     | 8.8 (IQR 6.4, 11.2)<br>93% were over 5y | 73% boys   |                                                 | 100% African/Afr-Caribbean (40%), South Asian, (40%) |                                                           |

|                                 |                 |                     |                                               |                                                          |          |                   |                                          |                                                         |
|---------------------------------|-----------------|---------------------|-----------------------------------------------|----------------------------------------------------------|----------|-------------------|------------------------------------------|---------------------------------------------------------|
|                                 |                 |                     |                                               |                                                          |          |                   | Mixed (13%) Or other minority ethnic     |                                                         |
| <b>Toubiana et al [45]</b>      | France, Paris   | 27 April and 11 May | 21 children with features of Kawasaki disease | 7.9 years (IQR 3.7, 16.6)                                | 43% boys | N/R               | 57% Sub-Saharan Africa/Caribbean islands | 76% had a BMI <b>below</b> the 97 <sup>th</sup> centile |
| <b>Pouletty et al [46]</b>      | Paris, France   | Since April 2020    | 16                                            | 10 (IQR 4.7, 12.5)                                       | 50% boys | Comorbidities 37% | N/R                                      | Overweight 25%                                          |
| <b>Caponi et al [47]</b>        | New York, US    | April 17 – May 13   | 33                                            | 8.6 years (IQR 5.5, 12.6)                                | 61% boys | Comorbidities 21% | 73% non-Hispanic                         | Overweight 6%<br>Obese 39%                              |
| <b>Feldstein L.R et al [48]</b> | Multicenter, US | March 15 to May 20  | 186                                           | 8.3 years (IQR 3.3, 12.5)                                | 62% boys | Comorbidities 27% | 31% Hispanic, 25% Black non hispanic     | Obesity 29%                                             |
| <b>Dufort E et al [49]</b>      | New York City   | March 01 to May 10  | 95                                            | 0-5 years (31%)<br>6-12 years (42%)<br>13-20 years (27%) | 54% boys | Comorbidities 64% | 40% Black<br>36% Hispanic                | Obesity 29%                                             |

Table 1. Demographic characteristics of patients with PIMS-TS. N/R: not reported.

Review Only



### Royal College of Paediatrics and Health Child (RCPCH) Definition [10]

1. A child presenting with persistent fever, inflammation (neutrophilia, elevated CRP and lymphopaenia) and evidence of single or multi-organ dysfunction (shock, cardiac, respiratory, renal, gastrointestinal or neurological disorder) with additional features. This may include children fulfilling full or partial criteria for Kawasaki disease.
2. Exclusion of any other microbial cause, including bacterial sepsis, staphylococcal or streptococcal shock syndromes, infections associated with myocarditis such as enterovirus (waiting for results of these investigations should not delay seeking expert advice).
3. SARS-CoV-2 PCR testing may be positive or negative.

### Centers for Disease Control and Prevention (CDC) Definition [11]

- 1. An individual aged < 21 years presenting with fever<sup>1</sup>, laboratory evidence of inflammation<sup>2</sup> and evidence of clinically severe illness requiring hospitalization, with multisystem (>2) organ involvement (cardiac, renal, respiratory, hematologic, gastrointestinal, dermatologic or neurological); AND**
- 2. No alternative plausible diagnoses; AND**
- 3. Positive for current or recent SARS-CoV-2 infection by RT-PCR, serology or antigen test; or COVID-19 exposure within the 4 weeks prior to the onset of symptoms.**

<sup>1</sup>Fever  $\geq 38.0^{\circ}\text{C}$  for  $\geq 24$  hours, or report of subjective fever lasting  $\geq 24$  hours

<sup>2</sup>Including, but not limited to, one or more of the following: an elevated C-reactive protein (CRP), erythrocyte sedimentation rate (ESR), fibrinogen, procalcitonin, d-dimer, ferritin, lactic acid dehydrogenase (LDH), or interleukin 6 (IL-6), elevated neutrophils, reduced lymphocytes and low albumin.

### World Health Organization Definition [12]

Children and adolescents 0–19 years of age with fever > 3 days

**AND** two of the following:

- a) Rash or bilateral non-purulent conjunctivitis or muco-cutaneous inflammation signs (oral, hands or feet).
- b) Hypotension or shock.
- c) Features of myocardial dysfunction, pericarditis, valvulitis, or coronary abnormalities (including ECHO findings or elevated Troponin/NT-proBNP),
- d) Evidence of coagulopathy (by PT, PTT, elevated d-Dimers).
- e) Acute gastrointestinal problems (diarrhoea, vomiting, or abdominal pain).

**AND**

Elevated markers of inflammation such as ESR, C-reactive protein, or procalcitonin.

**AND**

No other obvious microbial cause of inflammation, including bacterial sepsis, staphylococcal or streptococcal shock syndromes.

**AND**

Evidence of COVID-19 (RT-PCR, antigen test or serology positive), or likely contact with patients with COVID-19.

*Table 3.* RCPCH, CDC, WHO Definitions Criteria for Paediatric Inflammatory Multisystem Syndrome Temporally associated with COVID-19

From a clinical and laboratory perspective, PIMS-TS has usually been seen in previously healthy and frequently obese (30-60% of the series) children over eight years of age (80% of the cases) (*Table 1*). Initially, the group from the United Kingdom (UK) found MIS-C in patients of African descent, but it has been described in patients of all origins.<sup>4,32,33</sup> Persistent high fever for more than three to five consecutive days, maculopapular skin lesions (50-60%) reminiscent of Kawasaki disease (KD) and, frequently, signs of shock at the time of presentation have been the initial clinical characteristics.<sup>33</sup> Digestive symptoms (including nausea, vomiting, diarrhea or abdominal pain) usually present in most cases, as well as myocardial involvement (more than 60% of the series).<sup>14,33</sup> Cardiac involvement is broad and variable, with features including myocardial dysfunction (100% of the initial UK description - 60% in other series), coronary aneurysms, pericarditis, arrhythmias, refractory shock and elevated troponin I or pro-BNP<sup>32-34</sup> (*supplementary table 2*).

### **Guidelines for PIMS-TS management in middle and low-income countries**

With regard to treatment in middle and low-income countries, it is very important to maintain a high index of suspicion. Therefore, in these countries, it is important to use a systematic approach including early recognition and a bundle similar to those recommended for patients with other serious diseases. An expert consensus recently published in the United Kingdom using the Delphi method provides a good summary of the recommended treatments<sup>34</sup>. This approach is recommended for high-income countries. Using the evidence found, we adapted these recommendations, together with

1  
2  
3 those of the SCCM sepsis consensus<sup>16</sup>, for use in middle and low-income countries. We  
4 believe that a comprehensive approach to PIMS-TS patients is necessary, and that taking  
5 these recommendations as a whole could have an impact on the outcomes of PIMS-TS  
6 patients in these countries.  
7  
8  
9

10  
11 From the first presentation to the Emergency Department and / or PICU, two approaches  
12 can be assumed, one general and one specific.  
13

14  
15 a. *General approach*: A comprehensive approach should be used, similar to that  
16 recommended for patients with sepsis with organ dysfunction or septic shock. In this case,  
17 the contagiousness of SARS-CoV-2 requires the use of personal protective equipment  
18 (PPE) that prevents the spread of the virus, particularly in patients with a positive RT-  
19 PCR.  
20  
21  
22

23  
24 Moreover, the American College of Critical Care Medicine (ACCM) points out the need  
25 to give more attention to Institutional Practice Guidelines (IPGs) based on each facility's  
26 capability.<sup>35</sup> Once IPGs are established, diagnostic and therapeutic measures known as  
27 "patient care bundles" (PCBs) should be developed for a better approach and control of  
28 established processes. The PCBs include three to five evidence-based practices related to  
29 a health care process that should be performed collectively to achieve a synergistic result  
30 that improves care.<sup>36,37</sup>  
31  
32  
33  
34

35  
36 1. Early detection: a comprehensive approach based on a high index of suspicion is  
37 critical. This disease may occur with a wide spectrum of symptoms, so it should be  
38 suspected in all patients with a fever lasting more than three days associated with the  
39 symptoms described in *Figure 2*. Contact with a positive case is not always clear.  
40  
41  
42

43 2. Immediate, time-sensitive resuscitation:

44 - Oxygen therapy: This is part of the strategies described in recent sepsis guidelines<sup>16,37</sup>.  
45 High flow nasal cannulas (HFNCs) and non-invasive ventilation (NIV) have been  
46 considered in many reports,<sup>38</sup> especially in patients who have a deteriorated respiratory  
47 pattern with the use of accessory muscles or an SaO<sub>2</sub>/FiO<sub>2</sub> ratio less than 264. Most series  
48 describe respiratory involvement ranging from 20-60% (*Table 2*) and, generally, if  
49 endotracheal intubation is required, it is more highly associated with cardiovascular  
50 involvement. Cases classified as Class II by the CDC may be classified in these  
51 groups.<sup>33,38</sup>  
52  
53  
54  
55

56 - Fluid resuscitation: It is important to consider the recommendations in recently  
57 published guidelines.<sup>16</sup> In healthcare systems where staff and equipment for advanced  
58  
59  
60

1  
2  
3 airway management are available, up to 40–60 mL/kg (10–20 mL/kg per bolus) of  
4 balanced crystalloids (*Ringer's lactate or Plasma-Lyte*) can be given over the first hour,  
5 titrated to clinical markers of cardiac output, and discontinued if signs of fluid overload  
6 develop. In healthcare systems without the availability of intubation, crystalloid boluses  
7 may only be given in cases of hypotension (decompensated shock); in these cases, up to  
8 40 mL/kg of bolus fluid (10–20 mL/kg per bolus) may be infused over the first hour with  
9 titration to clinical markers of cardiac output, and discontinued if signs of fluid overload  
10 develop. If the child is not hypotensive, but has compensated shock, only maintenance  
11 fluids should be started, avoiding bolus fluids which are associated with worse  
12 outcomes<sup>35-38</sup>.

13  
14  
15  
16  
17  
18  
19  
20  
21 -Vasoactive drugs: According to the clinical condition, most series describe the need for  
22 vasoactive drugs in 10 to 60% of the cases with PIMS-TS. Most patients respond to fluid  
23 resuscitation. If necessary, epinephrine or norepinephrine should be considered according  
24 to the patient's condition.<sup>16,39</sup> Inotropes like dopamine, milrinone and levosimendan were  
25 reported to have been used in PIMS-TS.<sup>38-40</sup>

26  
27  
28  
29 -Antibiotic therapy: If bacterial co-infection is suspected, the first dose is recommended  
30 within the first three hours for sepsis associated with organ dysfunction, or within the first  
31 hour for children with septic shock.<sup>39-41</sup>

### 32 33 34 3. Stabilization with adequate monitoring:

35  
36 If possible, advanced hemodynamic monitoring should be instituted. Cardiac  
37 ultrasound/echocardiography or  $S_{cvo2}$  measurements have been suggested by recent  
38 guidelines<sup>16</sup> and patients with PIMS-TS.<sup>42</sup>

39  
40  
41 4. Timely referral or transfer is desirable in this context. In middle and low-income  
42 countries, it is common for patients to be transferred to higher complexity sites. Patients  
43 who are deteriorating or who may need intensive care should be identified. In the PIMS-  
44 TS of the CDC group, 84% of the cases had to be transferred to paediatric intensive care.  
45  
46  
47  
48  
49  
50  
51  
52  
53  
54  
55  
56  
57  
58  
59  
60  
16,40-42

5. Continuous measurement of processes and corrections must be instituted for a  
continuous quality improvement process.<sup>42</sup>

61  
62  
63  
64  
65  
66  
67  
68  
69  
70  
71  
72  
73  
74  
75  
76  
77  
78  
79  
80  
81  
82  
83  
84  
85  
86  
87  
88  
89  
90  
91  
92  
93  
94  
95  
96  
97  
98  
99  
100  
*b. Specific approach:* It is important to emphasize that, in moderate to severe cases, the  
use of immunomodulatory treatment should be considered. Heterogeneous management  
including human immunoglobulin, systemic steroids, anakinra, tocilizumab and aspirin  
<sup>40,42-45</sup> has been reported in the described series (*supplementary table 2*). The American

1  
2  
3 College of Rheumatology (ACR) recommendations for immunomodulatory therapy<sup>42</sup>  
4 have recently been published. We sought to adapt these recommendations to middle and  
5 low-income countries where resources are limited and each intervention must be  
6 streamlined according to need.  
7  
8  
9

- 10 ⇒ IVIG: High doses (2 gr/kg) should be considered for moderate to severe cases,  
11 particularly those with myocardial involvement. Prior to beginning the infusion,  
12 restored heart function must be verified.<sup>42</sup>  
13  
14 ⇒ Steroids: Steroids have recently been shown to be useful in modifying the clinical  
15 course of the disease in adults with severe pneumonia, particularly if they are on  
16 mechanical ventilation.<sup>43-47</sup> In patients with PIMS-TS, low doses could be  
17 considered in all cases (used in 70% of the series – *Table 3*). Dosing schemes of  
18 1-2 mg/kg/dose of methylprednisolone or its equivalent three or four times per  
19 day have been recommended. The ACR suggests considering high doses in cases  
20 of shock or in those with a high need for vasopressors, and we believe this  
21 recommendation is very important for middle and low-income countries,  
22 especially considering the frequency of late consults with advanced disease.  
23  
24 ⇒ Anakinra is suggested by the ACR consensus for use in cases of steroid or IVIG-  
25 refractory PIMS-TS.<sup>42</sup> However, in many countries, its use is not approved, or it  
26 is not available, and other biological agents are used. Prospective studies are  
27 needed to evaluate the efficacy and safety of these medications in PIMS-TS.  
28  
29 ⇒ Anticoagulation and antiplatelet treatment: Anticoagulation has become a  
30 fundamental treatment in adults, considering that there is a procoagulant and  
31 hypofibrinolytic state in severe SARS-CoV-2 infection.<sup>42,47-50</sup> In children with  
32 PIMS-TS it is recommended only in cases of documented thrombosis or in  
33 patients with an echocardiogram ejection fraction less than 35%.<sup>43,47</sup> Aspirin  
34 would also be recommended in patients with thrombocytosis (> 450,000 u/L) or  
35 Kawasaki-like disease criteria.<sup>42,47</sup>  
36  
37  
38  
39  
40  
41  
42  
43  
44  
45  
46  
47  
48  
49  
50  
51

52 The prognosis of the disease is usually good, with patient survival greater than 95% in  
53 different published series.<sup>5,6,42-50</sup> A mortality of 1-2% has been described in the published  
54 series, and up to 15% with cardiovascular sequelae, including aneurysms or  
55 dysfunction.<sup>33,48-50</sup> These patients should be followed up after discharge by inter and  
56 multidisciplinary teams including infectious disease, rheumatology and paediatrics.  
57  
58  
59  
60

1  
2  
3 However, there are incomplete data from all the cases, along with a knowledge gap  
4 regarding mild and moderate cases, the natural course and the clinical behavior of the  
5 disease.<sup>8,47-50</sup>  
6  
7  
8  
9

## 10 **Conclusion**

11 PIMS-TS is a new type of presentation of SARS-CoV-2 infection, with an exaggerated  
12 inflammatory response and inadequate inflammatory resolution with frequent *-but not*  
13 *exclusive-* digestive and myocardial involvement. It should be considered as a new  
14 disease with unique symptoms, a greater variety of clinical courses, and possibly different  
15 physiological mechanisms. In middle and low-income countries, studies should be  
16 performed to learn more about this disease in these regions and determine if they have  
17 different phenotypic behaviors. In addition, the real role of some inflammatory  
18 biomarkers and cost-effective therapeutic strategies should be determined.  
19  
20  
21  
22  
23  
24  
25  
26

## 27 **Contributors**

28 JFS, DS, RJ, PA, GG, GP conceptualized and designed the literature search. JFS, DS, RJ  
29 initiated the search and a first draft. All authors contributed to subsequent drafts. JFS, as  
30 group leader, supervised and moderated the search, initial drafts, the overall collation of  
31 the figures and tables and final manuscript. All authors approved the final manuscript as  
32 submitted and agree to be accountable for all aspects of the work  
33  
34  
35  
36  
37  
38

39 **Funding** The authors have not declared a specific grant for this research from any funding  
40 agency in the public, commercial or not-for-profit sectors.  
41  
42  
43

44 **Competing interests** No, there are no competing interests.  
45  
46  
47

48 **Patient consent for publication** Not required.  
49  
50

51 **Provenance and peer review:** Not commissioned; externally peer reviewed. Data  
52 availability statement  
53  
54  
55

56 **Data are available statement:** no data are available.  
57  
58  
59  
60

**Open access** This is an open access article distributed in accordance with the Creative Commons Attribution Non Commercial (CC BY-NC 4.0) license, which permits others to distribute, remix, adapt, build upon this work non-commercially, and license their derivative works on different terms, provided the original work is properly cited, appropriate credit is given, any changes made indicated, and the use is non-commercial. See: <http://creativecommons.org/licenses/by-nc/4.0/>.

**ORCID:** iD Jaime Fernández-Sarmiento <http://orcid.org/0000-0003-2874-2949116>

## REFERENCES

1. World Health Organization. Coronavirus disease 2019 (COVID-19): situation report. Available in: <http://www.who.int/docs/default-source/coronaviruse/situation-reports.2>. 28 Jun 2020.
2. Yang X, Yu Y, Xu J et al. Clinical course and outcomes of critically ill patients with SARS-CoV-2 pneumonia in Wuhan, China: a single-centered, retrospective, observational study. *Lancet Respir Med*. 2020. Epub 2020/02/28. doi: 10.1016/S2213-2600(20)30079-5.
3. Whittaker E, Bamford A, Kenny J et al. Clinical Characteristics of 58 Children with a Pediatric Inflammatory Multisystem Syndrome Temporally Associated with SARS-CoV2-2. *JAMA* 2020 Jun8; e2010369. Doi:10.1001/jama.2020.10369.
4. González-Damrauskas S, Vásquez-Hoyos P, Camporesi A, et al. Pediatric critical care and COVID19. *Pediatrics*. 2020; doi: 10.1542/peds.2020-1766.
5. De Biasi RL, Song X, Delaney M, et al. Severe COVID-19 in children and young adults in the Washington, DC Metropolitan Region. *J Pediatr* 2020. <https://doi.org/10.1016/j.jpeds.2020.05.007>. In press.
6. Riphagen S, Gomez X, Gonzalez-Martinez et al. Hyperinflammatory shock in children during COVID-19 pandemic. *Lancet* 2020 May 7. [https://doi.org/10.1016/S0140-6736\(20\)31094-1](https://doi.org/10.1016/S0140-6736(20)31094-1). S0140-6736(20)31094- 1, ahead of print.
7. Verdoni L, Mazza A, Gervasoni A, et al. An outbreak of severe Kawasaki-like disease at the Italian epicenter of the SARS-CoV-2 epidemic: an observational cohort study. *Lancet* 2020. [https://doi.org/10.1016/S0140-6736\(20\)31103-X](https://doi.org/10.1016/S0140-6736(20)31103-X). ahead of print.

- 1  
2  
3 8. Belhadj Z, Meot M, Bajolle F, et al. Acute heart failure in multisystem inflammatory  
4 syndrome in children (MIS-C) in the context of global SARS-CoV-2. pandemic.  
5 Circulation 2020 May 17. <https://doi.org/10.1161/CIRCULATIONAHA.120.048360>.  
6  
7 ahead of print.  
8  
9
- 10 9. Grimaud M, Starck J, Levy M et al. Acute myocarditis and multisystem inflammatory  
11 emerging disease following SARS-CoV-2 infection in critically ill children. Ann  
12 Intensive Care 2020; 10:69.  
13
- 14 10. Royal College of Paediatrics and Child Health. Available in:  
15 [https://www.rcpch.ac.uk/resources/guidance-paediatric-multisystem-inflammatory-](https://www.rcpch.ac.uk/resources/guidance-paediatric-multisystem-inflammatory-syndrome-temporally-associated-covid-19-pims)  
16 [syndrome-temporally-associated-covid-19-pims](https://www.rcpch.ac.uk/resources/guidance-paediatric-multisystem-inflammatory-syndrome-temporally-associated-covid-19-pims).  
17  
18
- 19 11. CDC. Multisystem Inflammatory Syndrome in Children (MIS-C) associated with  
20 coronavirus disease 2019 (COVID-19).  
21 <https://emergency.cdc.gov/han/2020/han00432.asp>.  
22  
23
- 24 12. WHO. Multisystem inflammatory syndrome in children and adolescents with COVID  
25 19 Scientific brief. Available en: [https://www.who.int/publications-detail/multisystem-](https://www.who.int/publications-detail/multisystem-inflammatory-syndrome-in-children-and-adolescents-with-covid-19)  
26 [inflammatory-syndrome-in-children-and-adolescents-with-covid-19](https://www.who.int/publications-detail/multisystem-inflammatory-syndrome-in-children-and-adolescents-with-covid-19). 15 May 2020.  
27  
28
- 29 13. Golfred-Cato S, Bryant B, Leung J et al. COVID-19- Associated Multiystem  
30 Inflammatory syndrome in Children- United States, March-July 2020. Available in  
31 <https://www.cdc.gov/mmwr/volumes/69/wr/pdfs/mm6932e2-H.pdf>.  
32  
33
- 34 14. Hoang A, Chroath K, Moreira A et al., COVID-19 in 7780 pediatric patients: A  
35 systematic review, E-Clinical Medicine (2020), [https://doi.org/](https://doi.org/10.1016/j.eclinm.2020.100433)  
36 [10.1016/j.eclinm.2020.100433](https://doi.org/10.1016/j.eclinm.2020.100433).  
37  
38
- 39 15. Tan L, Wang Q, Zhang D, et al. Lymphopenia predicts disease severity of COVID-  
40 19: a descriptive and predictive study. Signal Transduct Target Ther. 2020;5(1):33.  
41  
42 Published 2020 Mar 27. doi:10.1038/s41392-020-0148-4.  
43  
44
- 45 16. Weiss SL, Peters MJ, Alhazzani W, et al. Surviving sepsis campaign international  
46 guidelines for the management of septic shock and sepsis-associated organ dysfunction  
47 in children. Intensive Care Med 2020;46 (Suppl. 1):10–67.  
48  
49
- 50 17. Alhazzani W, Moller MH, Arabi YM, et al. Surviving sepsis campaign: guidelines on  
51 the management of critically ill adults with Coronavirus Disease 2019 (COVID-19).  
52 Intensive Care Med 2020;46(5):854–87.  
53  
54
- 55 18. Jaume M, Yip MS, Cheung CY et al. Anti-severe acute respiratory syndrome  
56 coronavirus spike antibodies trigger infection of human immune cells via a pH- and  
57  
58  
59  
60



1  
2  
3 cysteine protease-independent Fc. R pathway. *Journal of virology*. 2011;85(20):10582-  
4 97. 12.

5  
6 19. Fernández-Sarmiento J, Salazar LM, Carcillo J. The endothelial glycocalyx: a  
7 fundamental determinant of vascular permeability in sepsis. *Ped Crit Care*  
8 2020;21e:e291-e300.

9  
10 20. Carcillo JA, Kernan KK, Horvat CM et al. Why and How Is Hyperferritinemic Sepsis  
11 Different from Sepsis Without Hyperferritinemia? *Pediatr Crit Care Med*.  
12 2020;21(5):509-512. doi:10.1097/PCC.0000000000002285.

13  
14 21. Rosário C, Zandman-Goddard G, Meyron-Holtz EG, et al: The Hyperferritinemic  
15 syndrome: Macrophage activation syndrome, Still's disease, septic shock and  
16 catastrophic antiphospholipid syndrome. *BMC Med* 2013; 11:185.

17  
18 22. Pérez-Toledo M, Faustini S, Jossi S et al. Serology confirms SARS-CoV-2 infection  
19 in PCR-negative children presenting with Pediatric Inflammatory Multi-system  
20 syndrome. Institute of Immunology and Immunotherapy, University of Birmingham UK.  
21 Doi: <https://doi.org/10.1101/2020.06.05.20123117>. Online 07 June 2020.

22  
23 23. Kam YW, Kien F, Roberts A. et al. Antibodies against trimeric S glycoprotein protect  
24 hamsters against SARS-CoV challenge despite their capacity to mediate FcγRII-  
25 dependent entry into B cells in vitro. *Vaccine*. 2007;25(4):729-40.

26  
27 24. Wang SF, Tseng SP, Yen CH et al. Antibody-dependent SARS coronavirus infection  
28 is mediated by antibodies against spike proteins. *Biochemical and biophysical research*  
29 *communications*. 2014;451(2):208-14.

30  
31 25. Iba T, Levy JH, Connors JM et al. The unique characteristics of COVID-19  
32 coagulopathy. *Crit Care*. 2020;24(1):360. Published 2020 Jun 18. doi:10.1186/s13054-  
33 020-03077-0.

34  
35 26. Iba T, Levy JH. Sepsis-induced coagulopathy and disseminated intravascular  
36 coagulation. *Anesthesiology*. 2020;132(5):1238–45.

37  
38 27. Waltuch T, Gill P, Zinns LE et al. Features of COVID-19 post-infectious cytokine  
39 release syndrome in children presenting to the emergency department [published online  
40 ahead of print, 2020 May 8. *Am J Emerg Med*. 2020; S0735- 6757(20)30403-4.  
41 doi:10.1016/j.ajem.2020.05.058.

42  
43 28. Varga Z, Flammer AJ, Steiger P, et al. Endothelial cell infection and endothelitis in  
44 COVID-19. *Lancet*. 2020;395(10234):1417–8.

- 1  
2  
3 29. Yu B, Li X, Chen J, et al. Evaluation of variation in D-dimer levels among COVID-  
4 19 and bacterial pneumonia: a retrospective analysis [published online ahead of print,  
5 2020 Jun 10]. *J Thromb Thrombolysis*. 2020;1-10. doi:10.1007/s11239-020-02171-y.  
6  
7  
8 30. Bates SM. D-dimer assays in diagnosis and management of thrombotic and bleeding  
9 disorders. *Semin Thromb Hemost*. 2012;38(7):673-682. doi:10.1055/s-0032-1326782  
10  
11 31. Trivedi P, Cheeseman P, Mowat AP. Serum hyaluronic acid in healthy infants and  
12 children and its value as a marker of progressive hepatobiliary disease starting in infancy.  
13 *Clin Chim Acta*. 1993;215(1):29-39. doi:10.1016/0009-8981(93)90246-z.  
14  
15 32. Tan W, Aboulhosn J. The cardiovascular burden of coronavirus disease 2019  
16 (COVID-19) with a focus on congenital heart disease. *Int J Cardiol*. 2020;309: 7077. doi:  
17 10.1016/j.ijcard.2020.03.063.  
18  
19 33. Cheung E, Zachariah P, Gorelik M et al. Multisystem Inflammatory Syndrome  
20 Related to COVID-19 in Previously Healthy Children and Adolescents in New York City.  
21 *JAMA*. Published online June 8, 2020. Doi:10.1001/jama.2020.10374  
22  
23 34. Harwood R, Allin B, Jones C et al. A national consensus management pathway for  
24 paediatric inflammatory multisystem syndrome temporally associated with COVID-19  
25 (PIMS-TS): results of a national Delphi process. *Lancet Child Adolesc Health*. 2020  
26 Published Online September 18 doi.org/10.1016/S352-4642(20)30304-7  
27  
28 35. Davis AL, Carcillo JA, Aneja RK, et al. American College of Critical Care Medicine  
29 Clinical Practice Parameters for Hemodynamic Support of Pediatric and Neonatal Septic  
30 Shock. *Crit Care Med*. 2017; 45(6):1061-93.  
31  
32 36. Wip C, Napolitano L. Bundles to prevent ventilator-associated pneumonia: how  
33 valuable are they? *Curr Open Infect Dis*. 2009; 22(2):159-66.  
34  
35 37. Kohn Loncarica G, Fustiñana A, Jabornisky R. Recommendations for the  
36 management of pediatric septic shock in the first hour (part I). *Arch Argent Pediatr*  
37 2019;117(1): e14-e23.  
38  
39 38. Kaushik S, Aydin SI, Derespina KR, et al. Multisystem Inflammatory Syndrome in  
40 Children (MIS-C) Associated with SARS-CoV-2 Infection: A Multi-institutional Study  
41 from New York City [published online ahead of print, 2020 Jun 14]. *J Pediatr*.  
42 2020;S0022-3476(20)30747-239.  
43  
44 39. National Institute for Health and Care Excellence. Sepsis: Recognition, Diagnosis and  
45 Early Management. London, 2016;51. [Accessed on: June 27th, 2020]. Available at:  
46 [https://www.nice.org.uk/guidance/ng51/resources/sepsis-recognition-diagnosis-and-  
47 early-manage-ment-pdf-1837508256709](https://www.nice.org.uk/guidance/ng51/resources/sepsis-recognition-diagnosis-and-early-manage-ment-pdf-1837508256709).  
48  
49  
50  
51  
52  
53  
54  
55  
56  
57  
58  
59  
60

- 1  
2  
3 40. Ramcharan, T, Nolan, O, Lai C.Y. et al. Paediatric Inflammatory Multisystem  
4 Syndrome: Temporally Associated with SARS-CoV-2 (PIMS-TS): Cardiac Features,  
5 Management and Short-Term Outcomes at a UK Tertiary Paediatric Hospital. *Pediatr*  
6 *Cardiol* (2020). <https://doi.org/10.1007/s00246-020-02391-2>.  
7  
8  
9  
10 41. Fernández-Sarmiento J, Carcillo JA, Salinas CM, et al. Effect of a sepsis educational  
11 intervention on hospital stay. *Pediatr Crit Care Med*. 2018;19: e321–e328.  
12  
13 42. American College of Rheumatology. Clinical Guidance for Pediatric Patients with  
14 multisystem inflammatory syndrome in children (MIS-C) associated with SARS-CoV-2  
15 and hyperinflammation in covid-19. Available in  
16 <https://www.rheumatology.org/announcements#PediatricClinicalGuidance>. Jun3 17  
18 2020.  
19  
20  
21 43. Low-cost dexamethasone reduces death by up to one third in hospitalized patients  
22 with severe respiratory complications of COVID-19 [Internet]. RECOVERY  
23 (Randomised Evaluation of COVID-19 Therapy) University of Oxford. 2020 [cited 2020  
24 Jun 18]. Available from: [https://www.recoverytrial.net/news/low-cost-dexamethasone-](https://www.recoverytrial.net/news/low-cost-dexamethasone-reduces-death-by-up-to-one-third-in-hospitalised-patients-with-severe-respiratory-complications-of-covid-19)  
25 [reduces-death-by-up-to-one-third-in-hospitalised-patients-with-severe-respiratory-](https://www.recoverytrial.net/news/low-cost-dexamethasone-reduces-death-by-up-to-one-third-in-hospitalised-patients-with-severe-respiratory-complications-of-covid-19)  
26 [complications-of-covid-19](https://www.recoverytrial.net/news/low-cost-dexamethasone-reduces-death-by-up-to-one-third-in-hospitalised-patients-with-severe-respiratory-complications-of-covid-19).  
27  
28  
29  
30  
31 44. Rajasekaran S, Kruse K, Kovey K, et al. Therapeutic role of anakinra, an interleukin-1  
32 receptor antagonist, in the management of secondary hemophagocytic  
33 lymphohistiocytosis/ sepsis/multiple organ dysfunction/macrophage activating syndrome  
34 in critically ill children. *Pediatr Crit Care Med* 2014;15(5):401–8.  
35  
36  
37  
38 45. Toubiana J, Poirallut C, Corsia A et al. Kawasaki-like multisystem inflammatory  
39 syndrome in children during the covid-19 pandemic in Paris, France: prospective  
40 observational study. *BMJ* 2020;369m2094.  
41  
42  
43  
44 46. Pouletty M, Borocco C, Ouldali N et al. Paediatric multisystem inflammatory  
45 syndrome temporally associated with SARS-CoV-2 mimicking Kawasaki disease (Kawa-  
46 COVID-19): a multicentre cohort. *Ann Rheum Dis* 2020; 0:1-8.  
47  
48  
49 47. Capone CA, Subramony A, Sweberg T et al. Characteristics, Cardiac involvement,  
50 and Outcomes of Multisystem Inflammatory Disease of Childhood (MIS-C) Associated  
51 with SARS-CoV-2 Infection, *The Journal of Pediatrics* (2020), doi:  
52 <https://doi.org/10.1016/j.jpeds.2020.06.044>.  
53  
54  
55 48. Feldstein L.R, Rose E.B, Horwitz J.P et al. Multisystem Inflammatory Syndrome in  
56 U.S. Children and Adolescents. *N Engl J Med* 2020 June 29.  
57  
58  
59  
60  
Doi:10.1056/NEJMoa2021680.

1  
2  
3 49. Dufort E, Koumnas E, Chow E et al. Multisystem Inflammatory Syndrome in  
4 Children in New York State. N Engl J Med 2020 Jun 29. Doi:10.1056/NEJMoa2021756

5  
6 50. Prata-Barbosa A, Lima-Setta F, Rodrigues dos Santos G et al. Pediatric patients with  
7 COVID-19 admitted to intensive care units in Brazil: a prospective multicenter study.  
8

9  
10 Jornal de Pediatria. 2020;96(5):582-592.  
11  
12  
13  
14  
15  
16  
17  
18  
19  
20  
21  
22  
23  
24  
25

26 *Figure 1.* Selection process. We followed the PRISMA guidelines for reporting in  
27 systematic reviews and meta-analyses  
28  
29  
30  
31

32 *Table 1.* Demographic characteristics of patients with PIMS-TS  
33  
34

35 *Table 2.* Clinical and echocardiographic findings, and treatments instituted in the  
36 described series of PIMS-TS patients (*supplementary file*).  
37  
38  
39

40 *Table 3.* RCPCH, CDC and WHO Definition Criteria for Paediatric Inflammatory  
41 Multisystem Syndrome Temporally associated with COVID-19  
42  
43  
44  
45  
46  
47  
48  
49  
50  
51  
52  
53  
54  
55  
56  
57  
58  
59  
60

**Figure 1.** Selection process. We followed the PRISMA guidelines for reporting in systematic reviews and meta-analyses



| Author                     | Clinical presentation                                                                                                                                                                                                                                                                         | ECHO                                                                                                                                                                          | SARS-CoV-2 test                                                                                                           | Organ support                                                                                                               | Treatment                                                                                                   | Outcome / Died                                        |
|----------------------------|-----------------------------------------------------------------------------------------------------------------------------------------------------------------------------------------------------------------------------------------------------------------------------------------------|-------------------------------------------------------------------------------------------------------------------------------------------------------------------------------|---------------------------------------------------------------------------------------------------------------------------|-----------------------------------------------------------------------------------------------------------------------------|-------------------------------------------------------------------------------------------------------------|-------------------------------------------------------|
| <b>Whittaker et al [3]</b> | Fever 100%, Headache 26% Vomiting 45% Diarrhea 52%, Abdominal pain 53%, Rash 52% Conjunctivitis 45% Lymphadenopathy 16% Mucus membrane, changes/red cracked lips 29% Swollen hands and feet 16%, Respiratory symptoms 21%.<br><b>Fever + elevated inflammatory markers – 40%, Shock - 50%</b> | Left ventricular dysfunction 62% (18/29)<br>Abnormally dilated coronary arteries (z score >2) 8/55<br>Giant coronary artery aneurysms 2<br>Coronary artery aneurism 14% (n=8) | RT-PCR SARS-CoV-2 + 26%<br>IgG antibody SARS-CoV-2 + 87%<br><br>78% had evidence of current or prior SARS-CoV-2 infection | PICU 50%<br>Acute kidney injury 22%<br>Shock + inotropic support 47%<br>MV 43%<br>ECMO 5%                                   | Inotropic support 47%<br>IVIG 71%<br>Corticosteroids 64%<br>Anakinra 5%<br>Infliximab 14%                   | Death 2%                                              |
| <b>Riphagen et [6]</b>     | Fever 8/8<br>Diarrhoea 7/8<br>Abdominal pain 6/8<br>Vomiting 4/8<br>Conjunctivitis 5/8<br>Rash 4/8<br>Vasoplegic shock 8/8                                                                                                                                                                    | 7/8 ventricular dysfunction<br>Echobright coronary vessels<br>1/8 giant coronary aneurysm                                                                                     | SARS-CoV-2 negative 5/8<br>SARS-CoV-2 positive 2/8<br>Family exposure 4/8                                                 | Inotropic/vasopressor support 8/8, MV 5/8, HFNC 1/8, NIV 3/8, RRT 1/8, VA-ECMO 1/8 (arrhythmia with refractory shock, died) | IVIG 8/8, Corticoids 5/8<br>Aspirin 3/8, Heparin 1/8, Antibiotics 8/8, Infliximab 1/8                       | 1 died<br>6/8 alive<br>PICU length of stay 3 – 7 days |
| <b>Verdoni et [7]</b>      | Classic form of Kawasaki 50%, Incomplete form of Kawasaki disease 50%<br>Kdss and MAS 50%<br>Diarrhoea 60%<br>Meningeal signs 40%<br>Drowsiness 10%                                                                                                                                           | <b>Anormal ECHO 60%</b><br><b>Aneurism 10%</b><br><b>FEVE &lt; 50% – 50%</b><br>Mitral valve regurgitation 10%<br>Pericardial effusion 40%                                    | RT-PCR SARS-CoV-2 + 20%<br>Serology for SARS-CoV-2 antibodies – 80% were IgG +, and 3 were also IgM +                     |                                                                                                                             | Inotropic support 20%<br>Adjunctive steroid treatment 80%<br>IVIG 100%<br>Aspirin 20%                       | None                                                  |
| <b>Belhadjer et al [8]</b> | Asthenia 100%<br>Fever 100%<br>GI symptoms 83% (2 children underwent emergency operation for suspected appendicitis)<br>Respiratory distress 65%                                                                                                                                              | Coronary artery dilatation (z score > 2) 17%<br>Aneurysm 0<br>LVEF < 30% - 28%<br>LVEF 30-50% - 72%                                                                           | SARS-CoV-2 was confirmed 88.5%<br>RT-PCR-SARS-CoV-2 + 34%<br>Fecal PCR 6%<br>Antibodies + 86%                             | Respiratory support 94% (IMV 62%; NIV 32%)<br>VA-ECMO 28%                                                                   | Inotropic support 80%<br>IVIG 71%<br>Corticosteroids 34%<br>Anakinra 8%<br>Anticoagulation with heparin 65% | None                                                  |

|                                  |                                                                                                                                                                                                                                                         |                                                                                                                            |                                                                                                                                                    |                                                                                                   |                                                                                                                   |                                             |
|----------------------------------|---------------------------------------------------------------------------------------------------------------------------------------------------------------------------------------------------------------------------------------------------------|----------------------------------------------------------------------------------------------------------------------------|----------------------------------------------------------------------------------------------------------------------------------------------------|---------------------------------------------------------------------------------------------------|-------------------------------------------------------------------------------------------------------------------|---------------------------------------------|
|                                  | Rhinorrhea 43%<br>Adenopathy 60%<br>Rash 57%<br>Meningism 31%<br>At admission to the ICU,<br>80% were in cardiogenic<br>shock                                                                                                                           |                                                                                                                            |                                                                                                                                                    |                                                                                                   |                                                                                                                   |                                             |
| <b>Grimaud et al [9]</b>         | Fever 100%, Abdominal pain 100%, Rash 50%, Conjunctivitis 30%, Adenitis 20%, Tachycardia 100% Hypotension 100% (75% clinical signs of vasoplegia)                                                                                                       | LVEF 35% (IQR 25-55)                                                                                                       | SARS-CoV-nasopharyngeal swabs + 50% SARS-CoV-2 antibodies + 100% (15/15), <b>95% had identified SARS-CoV-2 infection on PCR and/or by serology</b> | NIV 55%,IMV 40%, HFNO 5%,Respiratory support in all patient was indicated for hemodynamic support | IVIg100%,Corticosteroids 10%, Anakinra 5%, Tocilizumab 5%, Inotropic/vasopressor support 95%                      | None                                        |
| <b>Cheung et al [33]</b>         | Fever 100% GI symptoms 88% Shock at presentation 76% Rash 71%, Conjunctivitis 65% Lip redness/swelling 65% Neurologic symptoms 47%, Respiratory symptoms 41%, Myalgia 35%, Lymphadenopathy 35%, Hypoxia 18% Criteria for KD 47% Incomplete Kawasaki 29% | FEVE mildly decreased 29% FEVE mild-moderately decreased 24% FEVE moderate-severely decreased 12% Pericardial effusion 47% | RT-PCR SARS-CoV-2 + 47% Serology for SARS-CoV-2 antibodies → 53%                                                                                   | PICU 88%                                                                                          | IVIg 76% Methylprednisolone 71% Hydrocortisone 21% Enoxaparin prophylaxis 59% Enoxaparin treatment 6% Aspirin 24% | None                                        |
| <b>Golfred-Cato S et al [13]</b> | Fever 100% Bilateral conjunctival injection 48.4% Oral mucose changes 23% Rash 55.3%                                                                                                                                                                    | Abnormal ECHO with coronary-artery aneurysms 18.6%                                                                         | RT-PCR 25.8% Serology positive 46.1% RT-PCR and serology positive 27.2%                                                                            | PICU 63.9% MV 13.1% Vasoactives 44.9%                                                             | IVIg 80.5% Steroids 62.8% Antiplatelet medication 58.6% Anticoagulation 44.2%                                     | Died 1.8% Organs systems involved 4-5 61.6% |
| <b>Kaushik et al [38]</b>        | Fever 93%, Abdominal pain 63%, Nausea/emesis 69%, Diarrhea 48%                                                                                                                                                                                          | Pericardial effusion 46%                                                                                                   | SARS-CoV-2 antibody + 81%                                                                                                                          | NIV 36% IMV 15% ECMO 3%                                                                           | IVIg 54%, Corticosteroids 51%, Tocilizumab 36%                                                                    | Death 3%                                    |

|                             |                                                                                                                                                                                                                                                                                                                                                                                         |                                                                                                                                                                                                                                                                     |                                                                                                                                                                                                                                                                            |                                                              |                                                                                                                                                                                                                   |      |
|-----------------------------|-----------------------------------------------------------------------------------------------------------------------------------------------------------------------------------------------------------------------------------------------------------------------------------------------------------------------------------------------------------------------------------------|---------------------------------------------------------------------------------------------------------------------------------------------------------------------------------------------------------------------------------------------------------------------|----------------------------------------------------------------------------------------------------------------------------------------------------------------------------------------------------------------------------------------------------------------------------|--------------------------------------------------------------|-------------------------------------------------------------------------------------------------------------------------------------------------------------------------------------------------------------------|------|
|                             | Hypotension 63%,<br>Mucocutaneous,<br>involvement 21%<br>Conjunctivitis 36%<br>Rash 42%, Shortness of<br>breath 33%<br>Neurologic involvement<br>12%                                                                                                                                                                                                                                    | LVEF median 46.6<br>(IQR 39.5, 52.8)<br>LVEF < 30%: 12%<br>LVEF 30-50%: 53%<br>Recovered LV function<br>prior to dischargr 95%                                                                                                                                      | RT-PCR SARS-CoV-2<br>+ 33%<br>18% tested + for both                                                                                                                                                                                                                        | Intra-aortic ballon<br>pump support 3%                       | Remdesivir 21%, Anakinra<br>12%, Convalescent plasma<br>therapy 3%, Aspirin 24%<br>Anticoagulation, prophylaxis<br>15%, Anticoagulation,<br>therapeutic 81% Antibiotics<br>> 48h 45%<br>Vasopressor/inotropes 51% |      |
| <b>Ramcharan et al [40]</b> | Fever 100%<br>GI symptoms 87%<br>Incomplete KD 53%                                                                                                                                                                                                                                                                                                                                      | 93% coronary artery<br>abnormalities<br>LVEF median on<br>admission 51%                                                                                                                                                                                             | 13% described typical<br>COVID-19 symptoms<br>in the previous two<br>months<br>20% related contacted<br>with family member<br>with COVID-19                                                                                                                                | Respiratory support<br>53%<br>Inotrope or vasopressor<br>67% | IVIG 67% (10/15), of whom<br>2 received a second dose<br>Metylprednisolone 33%<br>73% werw discharged on<br>low dose aspirin<br>Antibiotic 100%                                                                   | None |
| <b>Toubiana et al [45]</b>  | Recent history of viral-<br>like symptoms was report<br>in 43%<br>Median duration between<br>these symptoms and the<br>onset of signs and<br>symptoms of Kawasaki<br>disease was 45 days.<br>Complete presentation of<br>KD 52%, Abdominal<br>symptoms 95%, Lips and<br>oral cavity changes 76%<br>Conjunctivitis 81%<br>Rash 76%, Changes to<br>extremities 48%<br>Lymphadenopathy 57% | Myocarditis 76%<br>(LVFE range between<br>10 and 57%)<br>38% coronary artery<br>abnormalities: 24%<br>which consisted of<br>dilations (z score<br>between 2.0 and 2.5);<br>14% with increased<br>coronary visibility<br>No coronary<br>aneurysms were<br>identified | History of recent<br>contact with people<br>with viral-like<br>symptoms was + in<br>48%<br>Median interval<br>between reported<br>contact and KD was 36<br>days<br>RT-PCR-SARS-CoV-2<br>+ 38%<br>IgG antibodies SARS-<br>CoV-2 + 90%<br>9,5% negative<br>Serology and PCR) | PICU 81%<br>Vasoactive agents 71%<br>MV 52%                  | IVIG 100% (24% needed a<br>second dose)<br>Low dose aspirin (3-<br>5mg/kg/day) 100%<br>Corticosteroids (2-<br>10mg/kg/day) 48%<br>Antibiotic 86%                                                                  | None |
| <b>Pouletty et al [46]</b>  | Fever 100%<br>Respiratory signs 12%<br>GI signs 81%<br>Anosmia 6%                                                                                                                                                                                                                                                                                                                       | Abnormal ECHO 69%<br>Coronary dilatation<br>19% (median z score<br>2.6)                                                                                                                                                                                             | Family c/s COVID-19<br>infection 75%<br>First infectious<br>exposure-                                                                                                                                                                                                      |                                                              | IVIG 93%<br>(Second infusion 335)<br>Steroids 25%<br>Anakinra 6%                                                                                                                                                  | None |



|                                 |                                                                                                                                                                                                         |                                                                                                                                                         |                                                                                                                                                               |                                                                      |                                                                                                                                                           |                                                                                                                  |
|---------------------------------|---------------------------------------------------------------------------------------------------------------------------------------------------------------------------------------------------------|---------------------------------------------------------------------------------------------------------------------------------------------------------|---------------------------------------------------------------------------------------------------------------------------------------------------------------|----------------------------------------------------------------------|-----------------------------------------------------------------------------------------------------------------------------------------------------------|------------------------------------------------------------------------------------------------------------------|
|                                 | Neurological signs 56%<br>Rash 81%<br>Conjunctivitis 94%<br>Hands and feet edema/erythema 68%<br>Dry cracked lips 87%<br>Lymphadenopathy 37%<br>Haemodynamic failure 69%<br>Complete KD 62%<br>KDSS 44% | No aneurysm<br>Myocarditis 44%<br>(median LVEF 35%)<br>Pericarditis 25%                                                                                 | hospitalization 21 days<br>(IQR 21-24)<br>RT-PCR-SARS-CoV-2<br>all sites + 69%<br>Serology IgG + 87%                                                          |                                                                      | Tocilizumab 6%<br>AAS (30-50mg/kg) 52%<br>AAS anti-aggregant dose 50%                                                                                     |                                                                                                                  |
| <b>Caponi et al [47]</b>        | Fever 100%<br>GI symptoms 97%<br>Neurocognitive symptoms 58%<br>Respiratory symptoms 52%<br>Shock 75%<br>Complete KD 64%<br>HD without shock 76%                                                        | Any coronary abnormality 48%<br>(Z score $\geq 2.5$ – 15%;<br>Z score 2-2.49 – 9%)<br>Any dysfunction 58%:<br>(LVEF 45-54% - 33%;<br>LVEF 35-44% - 24%) | IgG + and Nucleic acid amplification + 18%<br>IgG + and Nucleic acid amplification negative 73%<br>Nucleic acid amplification +, serology test unavailable 9% | PICU 79%<br>MV 18%<br>Inotrope/vasopressor support 76%               | IVIG 100%<br>2 <sup>nd</sup> dose IVIG 33%<br>Methylprednisolone 70%<br>Aspirin 88%<br>Anakinra 12%<br>Tocilizumab 9%<br>Infliximab 13%<br>Enoxaparin 42% | None                                                                                                             |
| <b>Feldstein L.R et al [48]</b> | Fever 100%<br>Bilateral conjunctival injection 55%<br>Oral mucose changes 42%<br>Peripheral extremity changes 37%<br>Rash 59%                                                                           | Abnormal ECHO with coronary-artery aneurysms 9%                                                                                                         | RT-PCR or antibody testing 70%                                                                                                                                | PICU 80%<br>MV 20%<br>Inotrope or vasopressor support 48%<br>ECMO 4% | IVIG 77%<br>Secon dose 21%<br>Systemic glucocorticoid 49%<br>Interleukin-6 inhibitor 8%<br>Interleukin-1Ra inhibitor 13%<br>Anticoagulation 47%           | 28% were still hospitalized as of May 20, 2020, and 4 patients (2%) died, 2 of whom had previously been healthy. |
| <b>Dufort E et al (49)</b>      | Fever 100%, abdominal pain 61%, rash 60%,conjunctivitis 56%                                                                                                                                             | Abnormal ECHO with coronary-artery aneurysm 9%                                                                                                          | RT-PCR 51%, IgG antibodies 99%                                                                                                                                | PICU 80%, MV 10%, Vasopressor support 62%, ECMO 4%                   | IVIG 48%<br>Systemic glucocorticoids 64%                                                                                                                  | Death 2%, shock 10%, myocarditis 53%                                                                             |

1  
2  
3  
4 *Abbreviations: MV: mechanical ventilation, HFNC: high flow nasal cannula, NIV:noninvasive ventilation, RRT:renal replacement therapy, VA-*  
5 *ECMO: venu-arterial extracorporeal membrane oxygenation, PCR: protein C reactive, IVIG: immunoglobulin, FEVE: fraction ejection*  
6 *ventricular, RT-PCR: real time polymerase chain reaction, PICU: pediatric intensive care unit, KD:Kawasaki disease*  
7

8 *Supplementary File. Table 2. Clinical findings, echocardiographic and treatments instituted in the described series of PIMS-TS*  
9  
10  
11  
12  
13  
14  
15  
16  
17  
18  
19  
20  
21  
22  
23  
24  
25  
26  
27  
28  
29  
30  
31  
32  
33  
34  
35  
36  
37  
38  
39  
40  
41  
42  
43  
44  
45  
46

# BMJ Paediatrics Open

## Paediatric Inflammatory Multisystem Syndrome Temporally associated with COVID-19 (PIMS-TS): a narrative review and the viewpoint of the Latin American Society of Pediatric Intensive Care (SLACIP) Sepsis Committee

|                               |                                                                                                                                                                                                                                                                                                                                                                                                                                                  |
|-------------------------------|--------------------------------------------------------------------------------------------------------------------------------------------------------------------------------------------------------------------------------------------------------------------------------------------------------------------------------------------------------------------------------------------------------------------------------------------------|
| Journal:                      | <i>BMJ Paediatrics Open</i>                                                                                                                                                                                                                                                                                                                                                                                                                      |
| Manuscript ID                 | bmjpo-2020-000894.R2                                                                                                                                                                                                                                                                                                                                                                                                                             |
| Article Type:                 | Review                                                                                                                                                                                                                                                                                                                                                                                                                                           |
| Date Submitted by the Author: | 16-Dec-2020                                                                                                                                                                                                                                                                                                                                                                                                                                      |
| Complete List of Authors:     | Fernández-Sarmiento, Jaime ; Fundación Cardioinfantil Instituto de Cardiología, ; Universidad de La Sabana, De Souza, Daniela; Universidade de Sao Paulo Hospital Universitario de Sao Paulo<br>Jabornisky, Roberto; Universidad Nacional del Nordeste<br>Gonzalez , Gustavo Ariel ; Hospital Churruca Visca<br>Arias López, Maria del Pilar ; Ricardo Gutierrez Children's Hospital<br>Palacio , Gladys ; Ricardo Gutierrez Children's Hospital |
| Keywords:                     | Mortality, Pathology, Syndrome, Virology, Therapeutics                                                                                                                                                                                                                                                                                                                                                                                           |
|                               |                                                                                                                                                                                                                                                                                                                                                                                                                                                  |

SCHOLARONE™  
Manuscripts



I, the Submitting Author has the right to grant and does grant on behalf of all authors of the Work (as defined in the below author licence), an exclusive licence and/or a non-exclusive licence for contributions from authors who are: i) UK Crown employees; ii) where BMJ has agreed a CC-BY licence shall apply, and/or iii) in accordance with the terms applicable for US Federal Government officers or employees acting as part of their official duties; on a worldwide, perpetual, irrevocable, royalty-free basis to BMJ Publishing Group Ltd ("BMJ") its licensees and where the relevant Journal is co-owned by BMJ to the co-owners of the Journal, to publish the Work in this journal and any other BMJ products and to exploit all rights, as set out in our [licence](#).

The Submitting Author accepts and understands that any supply made under these terms is made by BMJ to the Submitting Author unless you are acting as an employee on behalf of your employer or a postgraduate student of an affiliated institution which is paying any applicable article publishing charge ("APC") for Open Access articles. Where the Submitting Author wishes to make the Work available on an Open Access basis (and intends to pay the relevant APC), the terms of reuse of such Open Access shall be governed by a Creative Commons licence – details of these licences and which [Creative Commons](#) licence will apply to this Work are set out in our licence referred to above.

Other than as permitted in any relevant BMJ Author's Self Archiving Policies, I confirm this Work has not been accepted for publication elsewhere, is not being considered for publication elsewhere and does not duplicate material already published. I confirm all authors consent to publication of this Work and authorise the granting of this licence.

1  
2  
3  
4  
5  
6  
7  
8  
9  
10  
11  
12  
13  
14  
15  
16  
17  
18  
19  
20  
21  
22  
23  
24  
25  
26  
27  
28  
29  
30  
31  
32  
33  
34  
35  
36  
37  
38  
39  
40  
41  
42  
43  
44  
45  
46  
47  
48  
49  
50  
51  
52  
53  
54  
55  
56  
57  
58  
59  
60

**Paediatric Inflammatory Multisystem Syndrome Temporally associated with COVID-19 (PIMS-TS): a narrative review and the viewpoint of the *Latin American Society of Pediatric Intensive Care (SLACIP) Sepsis Committee***

Jaime Fernández-Sarmiento MD PhD(c)<sup>1,6</sup>, Daniela Carla de Souza MD PhD<sup>2,6</sup>, Roberto Jabornisky MD<sup>3,6</sup>, Gustavo Ariel González MD<sup>4,5,6</sup>, María del Pilar Arias López MD<sup>5,6</sup>, Gladys Palacio MD<sup>5,6</sup>.

1 Department of Critical Care Medicine and Pediatrics, Universidad de la Sabana, Fundación Cardioinfantil - Instituto de Cardiología. CES Graduate School. Bogotá Colombia.

2 Pediatric Intensive Care Unit and Department of Pediatrics, Hospital Universitario da Universidad de São Paulo and Hospital Sírio Libanês, Sao Paulo, Brazil.

3 Department of Pediatrics. Facultad de Medicina. Universidad Nacional del Nordeste. Argentina.

4 Pediatric Intensive Care Unit. Hospital Churruca - Visca Medical Complex. Buenos Aires. Argentina.

5 Pediatric Intensive Care Unit. Ricardo Gutiérrez Children's Hospital, Buenos Aires, Argentina.

6 Sepsis Committee. Latin American Society of Pediatric Intensive Care (SLACIP).

Corresponding author: Jaime Fernández-Sarmiento, MD. Universidad de La Sabana, Campus del Puente del Común, Km 7 Autopista Norte de Bogotá, Chía - Cundinamarca - Colombia - South America. JaimeFe@unisabana.edu.co. + 057-16672727 ext 2204.

**Abstract**

*Background:* In this review, we discuss some important aspects of Paediatric Inflammatory Multisystem Syndrome Temporally associated with COVID-19 (PIMS-TS), a new syndrome that is temporally related to previous exposure to severe acute respiratory syndrome coronavirus 2 (SARS-CoV-2) infection. This virus has a broad spectrum of presentation which may overlap with Kawasaki disease (aKD) in terms of presenting symptoms, and laboratory and cardiac findings. Our objective was to review

1  
2  
3 and summarize published evidence regarding the most important aspects of PIMS-TS,  
4 with special emphasis on the treatment strategies suggested for middle- and low-income  
5 countries.  
6  
7  
8  
9

10 *Methods:* A systematic review of the literature was performed in the principal medical  
11 databases including PUBMED, EMBASE (OVID) and Google Scholar between  
12 December 2019 and August 2020.  
13  
14  
15

16  
17 *Results:* A total of 69 articles were identified in the described databases. Altogether, 13  
18 articles met the inclusion criteria and were eligible. The most frequently described  
19 symptoms of PIMS-TS include fever (82%), shock (67%), and gastrointestinal (87%),  
20 skin (71%) and cardiac disorders (75%). In most series, it has been observed between 4-  
21 6 weeks after the pandemic appears in the general population. Multisystem inflammatory  
22 syndrome in children is presented as a great systemic inflammatory response syndrome  
23 (SIRS), which sometimes presents as shock requiring fluid resuscitation and vasoactive  
24 drug support (26%). Several treatment strategies have been used, including  
25 immunoglobulin, steroids, aspirin, anakinra and anticoagulation, among others. These  
26 general and specific interventions should be guided by an inter- and multi-disciplinary  
27 team, especially in settings with limited resources.  
28  
29  
30  
31  
32  
33  
34  
35

36  
37 *Conclusions:* PIMS-TS COVID-19 is a new type of presentation of SARS-CoV-2  
38 infection, with an exaggerated inflammatory response and frequent *-but not exclusive-*  
39 digestive and myocardial involvement. It is important to describe the clinical course and  
40 outcomes in countries with limited resources as well as establish the role of biomarkers  
41 for early diagnosis, effective therapeutic strategies, and outpatient follow-up schemes.  
42  
43  
44  
45

46 *Key words:* septic shock, COVID-19, inflammation, immunoglobulin, Kawasaki disease,  
47 thrombosis, SARS-CoV-2  
48  
49  
50

### 51 **What is known about the subject?**

52 -PIMS-TS is a type of presentation of SARS-CoV-2 infection which produces a ten times  
53 greater need for hospitalization and mortality in children than other COVID-19  
54 presentations.  
55  
56

57 -It is characterized by fever, shock and gastrointestinal, skin and cardiac involvement,  
58 with prior positive real-time polymerase chain reaction (RT-PCR) or antibody tests.  
59  
60

1  
2  
3 -The diagnostic and treatment approach should be aimed at initial stabilization and shock  
4 management, especially in countries with limited resources. The specific treatment  
5 includes immunomodulators.  
6  
7  
8  
9

### 10 **What does this study add?**

11 For this SARS-CoV2 disease, which mainly affects children, a comprehensive approach  
12 is suggested which may be applied under the various healthcare system access conditions,  
13 including strategies geared towards middle- and low-income countries. This treatment  
14 includes general stabilization and shock management measures as well as the specific  
15 immunomodulatory therapy currently recommended based on the available evidence.  
16  
17  
18  
19  
20  
21

### 22 **INTRODUCTION**

23 In December 2019, a new viral infection was reported, causing severe respiratory  
24 infection and very high mortality. According to its genetic sequencing, this virus belongs  
25 to the genus *Beta coronavirus*, closely related to the severe acute respiratory syndrome  
26 (SARS) virus. It was named SARS-CoV-2 and its disease COVID-19.<sup>1,2</sup>  
27  
28

29 Healthcare systems worldwide have been deeply concerned, given SARS-CoV-2's high  
30 transmissibility, severity and lethality, particularly in the population over the age of 60.<sup>1</sup>  
31 Patients with major comorbidities such as heart disease, diabetes, hypertension, or obesity  
32 have an increased risk of dying.<sup>1,2</sup> Moreover, mortality has been associated with multiple  
33 organ failure (MOF) as the common final pathway for pneumonia, sepsis, and acute  
34 respiratory distress syndrome (ARDS). COVID-19 is usually less severe in paediatric  
35 patients. In general, 80-90% of children with SARS-CoV-2 infection are asymptomatic  
36 or have a mild infection. However, between 4 -10% of hospitalized children may need to  
37 be transferred to a paediatric intensive care unit (PICU), and mortality ranges from 0.1%  
38 to 8%.<sup>3,4</sup> Recently, the Critical Coronavirus and Kids Epidemiology (CAKE) study  
39 reported a mortality rate of 5% in children hospitalized in critical care in five European  
40 and American countries (Chile, Colombia, Italy, Spain and USA), with 76% of cases  
41 having severe pneumonia as their main manifestation.<sup>4</sup>  
42  
43  
44  
45  
46  
47  
48  
49  
50  
51  
52

53 Several pathophysiological factors may explain these features. COVID-19 non-survivors  
54 have higher serum ferritin, D-dimer and C-reactive protein (CRP) than those who survive,  
55 indicating an intense inflammatory response<sup>2</sup>. Recently, a new type of presentation of  
56 SARS-CoV-2 infection has been described in children, involving this significant  
57 inflammatory response. This new disease has been called Paediatric Inflammatory  
58  
59  
60

1  
2  
3 Multisystem Syndrome Temporally associated with COVID-19 (PIMS-TS), a new  
4 syndrome that is temporally related to previous exposure to severe acute respiratory  
5 syndrome coronavirus 2 (SARS-CoV-2) infection. This is a severe presentation of the  
6 virus in children and requires early detection to avoid its progression and potentially  
7 unsatisfactory outcomes<sup>5</sup>. In this article, we discuss and review the most relevant aspects  
8 of PIMS-TS described to date.  
9  
10  
11  
12

## 13 14 15 **METHODS**

### 16 17 **Search strategy and article selection**

18  
19  
20 A systematic review of the literature was performed in the principal medical databases  
21 including PUBMED, EMBASE (OVID) and Google scholar, using the MeSH terms  
22 (“SARS-CoV-2” OR “Covid-19” OR “coronavirus” OR “infection” OR “sepsis” OR  
23 “covid-19” OR “critical care”) AND “Multisystem Inflammatory Syndrome in Children”  
24 OR “MIS-C” OR “PIMS-TS” between December 2019 and August 2020. The descriptors  
25 were validated in DecS (descriptors in health science) and MeSH (medical subject  
26 headings). Grey literature or as yet unpublished documents were not included.  
27  
28  
29  
30  
31  
32

### 33 34 **Eligibility criteria**

35  
36 Articles which reported at least five cases of PIMS-TS, including case series, case reports,  
37 and cross-sectional, case-control, cohort (either prospective or retrospective) or clinical  
38 trial studies, were included. Studies of critically ill children with COVID-19 were also  
39 considered, and the cases of PIMS-TS reported in these studies were explored. Other  
40 inclusion criteria were articles which described important outcomes such as mortality,  
41 complications, laboratory findings and treatment received. Only articles in English,  
42 Spanish or Portuguese were considered. No reports of PIMS-TS in low and middle-  
43 income countries were found in indexed journals. The World Health Organization  
44 (WHO), Centers for Disease Control (CDC) and Royal College guidelines were consulted  
45 for the definitions. Articles which did not provide complete data when reporting general  
46 cases of critically ill children with COVID-19, or those for which the full text was not  
47 available, as well as narrative reviews, were excluded. Adult cases have already been  
48 described, but these were not included in this review.  
49  
50  
51  
52  
53  
54  
55  
56  
57  
58  
59  
60



### Study selection and data collection process

First, the inclusion and exclusion criteria for this systematic review were defined, after which one of the researchers (JFS) performed the systematic search of the literature and reviewed the most relevant articles. The established criteria were applied, and the articles were approved by all the SLACIP sepsis committee authors. In case of doubt, or a lack of consensus regarding the inclusion of an article, a second reviewer (RJ) was consulted to decide. Any discrepancies or missing data were resolved by consensus. Preferred Reporting Items for Systematic Reviews and Meta-Analysis (PRISMA) guidelines were followed. (Figure 1).

### Patient and Public Involvement statement

No patients participated actively in this review. The data were taken from the most important publications to date on PIMS-TS, including consensus recommendations for high-income countries. It is expected that this information will be disseminated through SLACIP and its various committees for applicability in patients living in middle- and low-income countries.

## RESULTS

### Search and study selection results

A total of 69 articles were identified in the described databases. After eliminating the duplicates and reviews, 13 articles met the inclusion criteria and were eligible. These articles were included in the qualitative synthesis and the most relevant ones which do not include patients reported in other case series are described by their characteristics in Table 1.

Although the main pathogenesis of COVID-19 may be similar to other viruses such as influenza, it has shown some clinical presentations which are different from those usually found in those classical respiratory viruses. On April 24, 2020, a new presentation of SARS-CoV-2 in children was described by Riphagen et al. in the United Kingdom.<sup>6</sup> The first report described a cohort of eight children with COVID-19 who required hospitalization in intensive care and had an unusual clinical behavior characterized by a severe hyperinflammatory state, with clinical similarity between all eight patients.<sup>7-9</sup>

The Royal College of Paediatrics and Child Health called this new entity PIMS-TS.<sup>10</sup> Subsequently, the CDC and WHO called it multisystem inflammatory syndrome in

1  
2  
3 children (MIS-C).<sup>11,12</sup> In general, both terms refer to the same entity and the latter name  
4 has been the most frequently used in the main descriptions of this disease (*Table 2*).

5  
6 The largest series described to date is that of the CDC in Atlanta, with 570 patients. Using  
7 a latent class analysis (LCA) statistical model, it attempted to divide the cases into three  
8 large groups according to their common clinical characteristics.<sup>13</sup> Class I included those  
9 with symptoms which could overlap with macrophage activation syndrome, with a large  
10 inflammatory response. Class II had predominantly respiratory involvement and signs  
11 suggestive of active COVID-19 disease with a high rate of RT-PCR seropositivity (84%).  
12 Class III had clinical manifestations that could overlap with Kawasaki disease, and only  
13 2% were RT-PCR positive.<sup>13</sup>  
14  
15  
16  
17  
18  
19  
20  
21

22 In this regard, most studies report that the patients have a negative RT-PCR and positive  
23 antibody or serology tests. In fact, a negative RT-PCR has been found in 40% of patients  
24 with positive antibody tests. Although RT-PCR is an imperfect test, it is considered the  
25 gold standard today. In the described series, 46% of the cases had a positive serology and  
26 a negative RT-PCR, which suggests that, in these patients, the infection occurred possibly  
27 weeks earlier. An average of 25% of the patients in the included studies had both positive  
28 serology and positive RT-PCR (*supplementary table S1* ).  
29  
30  
31  
32  
33  
34  
35  
36  
37

## 38 **DISCUSSION**

39 PIMS-TS is characterized by a very significant ongoing inflammatory response, in  
40 crescendo, which in fact has been the key element in the Atlanta CDC (May 14<sup>th</sup>) and  
41 WHO (May 15<sup>th</sup>) definitions (*Table 2*).<sup>11,12</sup> Characteristically, these patients present with  
42 high leukocytosis, CRP, procalcitonin (PCT), and serum ferritin.<sup>13</sup> Hoang et al.<sup>14</sup> reported  
43 lower expression of circulating CD16+CD56+ natural killer cells and more profound  
44 lymphopenia in children with PIMS-TS compare to those without PIMS-TS.  
45

46 Primarily, there is an initial innate immune response with the macrophages as the  
47 principal actors. From the pathophysiological point of view, it is striking that more than  
48 90% of children with PIMS-TS have elevated CRP and ferritin. C-reactive protein is an  
49 acute phase reactant that usually rises after six hours of an inflammatory state and is  
50 produced by hepatocytes and adipose tissue in response to IL-1, IL-6 and TNF- $\alpha$   
51 stimulation.<sup>15,16</sup> This acute phase reactant from the pentraxin family identifies  
52 phosphatidylserine on the surface of cells that have initiated a programmed cell death  
53  
54  
55  
56  
57  
58  
59  
60

1  
2  
3 pattern of apoptosis by activating the complement system. This biomarker is very useful  
4 for diagnosis and follow up, especially in middle and low-income countries (given its low  
5 cost), and should be considered on admission with subsequent follow up.  
6  
7

8 Additionally, a marked elevation of ferritin (2-10 times its normal value) has been  
9 observed in more than 90% of the series.<sup>13-17</sup> Ferritin is a protein that stores iron and  
10 releases it in a controlled fashion, but also in pathophysiologic conditions. Its levels can  
11 reflect macrophage response to free hemoglobin as well as DNA viruses, intracellular  
12 bacterial infections and parasites.<sup>18-20</sup> Ferritin can induce positive feedback inflammation,  
13 upregulating toll-like receptor 9 (TLR-9) which leads macrophage inflammasome IL-1  
14 and IL-18 to feed forward ferritin production. TLR-9 may also be stimulated by viral  
15 DNA, other infections and host damage-associated molecular patterns (DAMP).<sup>20</sup> This  
16 whole process generates a large number of inflammasomes and an enhanced  
17 inflammatory pathway, delivering the “cytokine storm.” This precipitate cell death with  
18 a pyroptosis pattern and new DAMPs that stimulate TLR-9.<sup>20</sup> This was described as  
19 “*Hyperferritinemic Syndrome*” by Rosario<sup>21</sup>.  
20  
21  
22  
23  
24  
25  
26  
27  
28  
29

30 Nevertheless, there is evidence of an unusual late adaptive immunity response. It has  
31 come to the researchers attention that PIMS-TS occurred between four and six weeks  
32 after the peak of cases reported as positive for SARS-CoV-2 in each country had been  
33 reached.<sup>13</sup> Pérez-Toledo M et al.<sup>22</sup> recently described eight patients with PIMS-TS with  
34 a negative RT-PCR but with significant elevation of IgG and IgA, and negative IgM.  
35 Additionally, they found elevated IgG1 and IgG3 in these children, which are  
36 immunoglobulin isotypes associated with serum supplement activation. This situation is  
37 consistent with highly elevated CRP related to COVID-19, which activates the  
38 complement system. The elevation of these immunoglobulins suggests that PIMS-TS  
39 occurs due to tissue damage induced by autoantibodies, a situation that has been described  
40 in other types of coronavirus infection.<sup>23-24</sup> We are not aware of any studies in middle  
41 and low-income countries which have described this serological behaviour. Studies are  
42 needed to help clear up this aspect, especially when all the diagnostic test options for  
43 SARS-CoV-2 are not always available. In these countries with limited resources, we  
44 suggest taking an initial RT-PCR. If this is negative and there is a high index of suspicion  
45 of PIMS-TS, due to the signs and symptoms, a total antibody or IgM/IgG test should be  
46 performed.<sup>24</sup>  
47  
48  
49  
50  
51  
52  
53  
54  
55  
56  
57  
58  
59  
60

1  
2  
3 For PIMS-TS, most of the series described coagulation disorders. Severe coagulopathy  
4 was seen in 70-80% of the cases (very high D-dimers, prolonged PT, PTT).<sup>13</sup> Like  
5 inflammation, coagulation is necessary for host defense. In addition, proinflammatory  
6 cytokines, monocytes / macrophages, neutrophil activation, and extracellular neutrophil  
7 traps (NETs) can foster local thrombosis. COVID-19 associated coagulopathy (CAC) is  
8 complex and in some ways pathophysiologically different from SIC.<sup>25,26</sup>  
9

10  
11  
12  
13  
14  
15 Cytokine levels of IL-1 $\beta$  and IL-6 are elevated, which induces thrombocytosis and  
16 hyperfibrinogenemia, and the angiotensin-converting enzyme 2 (ACE-2) receptor is  
17 stimulated by SARS-CoV-2, leading to a massive release of plasminogen activators.<sup>27, 28</sup>  
18 D-dimer levels are very high in PIMS-TS, but consumptive coagulopathy is rare in its  
19 early phase.<sup>28</sup> Elevated D-dimer levels can be present in a wide variety of inflammatory  
20 and prothrombotic conditions;<sup>29</sup> in COVID-19, these are probably more associated with  
21 inflammation than thrombosis.<sup>30</sup> Furthermore, serum hyaluronic acid, a key glycocalyx  
22 component, is higher during infancy, progressively diminishing over the years.<sup>19,31</sup> This  
23 could explain a more protected endothelium and a lower probability of a hypercoagulable  
24 state. In addition, CAC has an overlapping pathophysiology with other coagulopathies  
25 like hemophagocytic syndrome (HPS) / hemophagocytic lymphohistiocytosis (HLH),  
26 antiphospholipid syndrome (APS), and thrombotic thrombocytopenic purpura (TTP) /  
27 hemolytic uremic syndrome (HUS), but some unique aspects make it a probably new type  
28 of coagulopathy.<sup>32</sup>  
29  
30  
31  
32  
33  
34  
35  
36  
37  
38  
39  
40  
41  
42  
43  
44  
45  
46  
47  
48  
49  
50  
51  
52  
53  
54  
55  
56  
57  
58  
59  
60

| Author                           | City, Country                                      | Period                                         | Number | Age                                     | Gender     | Comorbidity                                     | Race                                                 | IMC kg/m <sup>2</sup>                                     |
|----------------------------------|----------------------------------------------------|------------------------------------------------|--------|-----------------------------------------|------------|-------------------------------------------------|------------------------------------------------------|-----------------------------------------------------------|
| <b>Whittaker et al [3]</b>       | London, UK                                         | March 23 and May 16                            | 58     | 9 years (IQR 5.7, 14)                   | 43% boys   | 7/58 Comorbidities                              | 69% black or Asian                                   | N/R                                                       |
| <b>Riphagen et al [6]</b>        | London, UK                                         | 10 days in mid-April                           | 8      | 4 – 14 years (range)                    | 5/8 boy    | None                                            | 6/8 Afro-Caribbean                                   | 14 – 33<br>7/8 > 75 <sup>th</sup><br>centile/weight       |
| <b>Verdoni et al [7]</b>         | Bergamo, Italy                                     | Feb 18 and April 20                            | 10     | 7.5 years (SD 3-5)                      | 7/10 boys  | N/R                                             | N/R                                                  | N/R                                                       |
| <b>Belhadjer et al [8]</b>       | France (12 hospitals) and Switzerland (1 hospital) | March 22 to April 30                           | 35     | 10 years (IQR 8.2, 12.4)                | 51% boys   | Comorbidities 28% (asthma 8.55; lupus 3%)       | N/R                                                  | Overweight 17%                                            |
| <b>Golfred-Cato S et al [13]</b> | Multicenter US                                     | March 01 to July 29                            | 570    | 8 (IQR 4,12)                            | 55.4% boys | Comorbidities 8%                                | 40.5% Hispanic and 33.1% Black Non-hispanic          | Obesity 25.6%                                             |
| <b>Cheung et al [33]</b>         | New York, US                                       | April 18 and May 5                             | 17     | 8 years (IQR 1.8, 16)                   | 47% boys   | Most were previously healthy (mild asthma in 3) | White 70%                                            | N/R                                                       |
| <b>Kaushik et al [38]</b>        | New York, US                                       | April 23 to May 23                             | 33     | 10 years (IQR 6, 13)                    | 61% boys   | Comorbidities 48%                               | 45% Hispanic/latino<br>39% black                     | Overweight 12%<br>Obesity (BMI > 30kg/m <sup>2</sup> ) 6% |
| <b>Ramcharan et al [40]</b>      | UK                                                 | 10 <sup>th</sup> April and 9 <sup>th</sup> May | 15     | 8.8 (IQR 6.4, 11.2)<br>93% were over 5y | 73% boys   |                                                 | 100% African/Afr-Caribbean (40%), South Asian, (40%) |                                                           |

|                                 |                 |                     |                                               |                                                          |          |                   |                                          |                                                         |
|---------------------------------|-----------------|---------------------|-----------------------------------------------|----------------------------------------------------------|----------|-------------------|------------------------------------------|---------------------------------------------------------|
|                                 |                 |                     |                                               |                                                          |          |                   | Mixed (13%) Or other minority ethnic     |                                                         |
| <b>Toubiana et al [45]</b>      | France, Paris   | 27 April and 11 May | 21 children with features of Kawasaki disease | 7.9 years (IQR 3.7, 16.6)                                | 43% boys | N/R               | 57% Sub-Saharan Africa/Caribbean islands | 76% had a BMI <b>below</b> the 97 <sup>th</sup> centile |
| <b>Pouletty et al [46]</b>      | Paris, France   | Since April 2020    | 16                                            | 10 (IQR 4.7, 12.5)                                       | 50% boys | Comorbidities 37% | N/R                                      | Overweight 25%                                          |
| <b>Caponi et al [47]</b>        | New York, US    | April 17 – May 13   | 33                                            | 8.6 years (IQR 5.5, 12.6)                                | 61% boys | Comorbidities 21% | 73% non-Hispanic                         | Overweight 6%<br>Obese 39%                              |
| <b>Feldstein L.R et al [48]</b> | Multicenter, US | March 15 to May 20  | 186                                           | 8.3 years (IQR 3.3, 12.5)                                | 62% boys | Comorbidities 27% | 31% Hispanic, 25% Black non hispanic     | Obesity 29%                                             |
| <b>Dufort E et al [49]</b>      | New York City   | March 01 to May 10  | 95                                            | 0-5 years (31%)<br>6-12 years (42%)<br>13-20 years (27%) | 54% boys | Comorbidities 64% | 40% Black<br>36% Hispanic                | Obesity 29%                                             |

Table 1. Demographic characteristics of patients with PIMS-TS. N/R: not reported.

Review Only

### Royal College of Paediatrics and Health Child (RCPCH) Definition [10]

1. A child presenting with persistent fever, inflammation (neutrophilia, elevated CRP and lymphopaenia) and evidence of single or multi-organ dysfunction (shock, cardiac, respiratory, renal, gastrointestinal or neurological disorder) with additional features. This may include children fulfilling full or partial criteria for Kawasaki disease.
2. Exclusion of any other microbial cause, including bacterial sepsis, staphylococcal or streptococcal shock syndromes, infections associated with myocarditis such as enterovirus (waiting for results of these investigations should not delay seeking expert advice).
3. SARS-CoV-2 PCR testing may be positive or negative.

### Centers for Disease Control and Prevention (CDC) Definition [11]

- 1. An individual aged < 21 years presenting with fever<sup>1</sup>, laboratory evidence of inflammation<sup>2</sup> and evidence of clinically severe illness requiring hospitalization, with multisystem (>2) organ involvement (cardiac, renal, respiratory, hematologic, gastrointestinal, dermatologic or neurological); AND**
- 2. No alternative plausible diagnoses; AND**
- 3. Positive for current or recent SARS-CoV-2 infection by RT-PCR, serology or antigen test; or COVID-19 exposure within the 4 weeks prior to the onset of symptoms.**

<sup>1</sup>Fever  $\geq 38.0^{\circ}\text{C}$  for  $\geq 24$  hours, or report of subjective fever lasting  $\geq 24$  hours

<sup>2</sup>Including, but not limited to, one or more of the following: an elevated C-reactive protein (CRP), erythrocyte sedimentation rate (ESR), fibrinogen, procalcitonin, d-dimer, ferritin, lactic acid dehydrogenase (LDH), or interleukin 6 (IL-6), elevated neutrophils, reduced lymphocytes and low albumin.

### World Health Organization Definition [12]

Children and adolescents 0–19 years of age with fever > 3 days

**AND** two of the following:

- a) Rash or bilateral non-purulent conjunctivitis or muco-cutaneous inflammation signs (oral, hands or feet).
- b) Hypotension or shock.
- c) Features of myocardial dysfunction, pericarditis, valvulitis, or coronary abnormalities (including ECHO findings or elevated Troponin/NT-proBNP),
- d) Evidence of coagulopathy (by PT, PTT, elevated d-Dimers).
- e) Acute gastrointestinal problems (diarrhoea, vomiting, or abdominal pain).

**AND**

Elevated markers of inflammation such as ESR, C-reactive protein, or procalcitonin.

**AND**

No other obvious microbial cause of inflammation, including bacterial sepsis, staphylococcal or streptococcal shock syndromes.

**AND**

Evidence of COVID-19 (RT-PCR, antigen test or serology positive), or likely contact with patients with COVID-19.

*Table 2.* RCPCH, CDC, WHO Definitions Criteria for Paediatric Inflammatory Multisystem Syndrome Temporally associated with COVID-19

From a clinical and laboratory perspective, PIMS-TS has usually been seen in previously healthy and frequently obese (30-60% of the series) children over eight years of age (80% of the cases) (*Table 1*). Initially, the group from the United Kingdom (UK) found MIS-C in patients of African descent, but it has been described in patients of all origins.<sup>4,32,33</sup> Persistent high fever for more than three to five consecutive days, maculopapular skin lesions (50-60%) reminiscent of Kawasaki disease (KD) and, frequently, signs of shock at the time of presentation have been the initial clinical characteristics.<sup>33</sup> Digestive symptoms (including nausea, vomiting, diarrhea or abdominal pain) usually present in most cases, as well as myocardial involvement (more than 60% of the series).<sup>14,33</sup> Cardiac involvement is broad and variable, with features including myocardial dysfunction (100% of the initial UK description - 60% in other series), coronary aneurysms, pericarditis, arrhythmias, refractory shock and elevated troponin I or pro-BNP<sup>32-34</sup> (*supplementary table S1*).

### **Guidelines for PIMS-TS management in middle and low-income countries**

With regard to treatment in middle and low-income countries, it is very important to maintain a high index of suspicion. Therefore, in these countries, it is important to use a systematic approach including early recognition and a bundle similar to those recommended for patients with other serious diseases. An expert consensus recently published in the United Kingdom using the Delphi method provides a good summary of the recommended treatments<sup>34</sup>. This approach is recommended for high-income countries. Using the evidence found, we adapted these recommendations, together with



1  
2  
3 those of the SCCM sepsis consensus<sup>16</sup>, for use in middle and low-income countries. We  
4 believe that a comprehensive approach to PIMS-TS patients is necessary, and that taking  
5 these recommendations as a whole could have an impact on the outcomes of PIMS-TS  
6 patients in these countries.  
7  
8  
9

10  
11 From the first presentation to the Emergency Department and / or PICU, two approaches  
12 can be assumed, one general and one specific (*Table 3*):  
13

14  
15 a. *General approach*: A comprehensive approach should be used, similar to that  
16 recommended for patients with sepsis with organ dysfunction or septic shock. In this case,  
17 the contagiousness of SARS-CoV-2 requires the use of personal protective equipment  
18 (PPE) that prevents the spread of the virus, particularly in patients with a positive RT-  
19 PCR.  
20  
21  
22

23  
24 Moreover, the American College of Critical Care Medicine (ACCM) points out the need  
25 to give more attention to Institutional Practice Guidelines (IPGs) based on each facility's  
26 capability.<sup>35</sup> Once IPGs are established, diagnostic and therapeutic measures known as  
27 "patient care bundles" (PCBs) should be developed for a better approach and control of  
28 established processes. The PCBs include three to five evidence-based practices related to  
29 a health care process that should be performed collectively to achieve a synergistic result  
30 that improves care.<sup>36,37</sup>  
31  
32  
33  
34

35  
36 1. Early detection: a comprehensive approach based on a high index of suspicion is  
37 critical. This disease may occur with a wide spectrum of symptoms, so it should be  
38 suspected in all patients with a fever lasting more than three days associated with the  
39 symptoms described in *Table 2*. Contact with a positive case is not always clear.  
40  
41  
42

43 2. Immediate, time-sensitive resuscitation:

44 - Oxygen therapy: This is part of the strategies described in recent sepsis guidelines<sup>16,37</sup>.  
45 High flow nasal cannulas (HFNCs) and non-invasive ventilation (NIV) have been  
46 considered in many reports,<sup>38</sup> especially in patients who have a deteriorated respiratory  
47 pattern with the use of accessory muscles or an SaO<sub>2</sub>/FiO<sub>2</sub> ratio less than 264. Most series  
48 describe respiratory involvement ranging from 20-60% (*supplementary table S1*) and,  
49 generally, if endotracheal intubation is required, it is more highly associated with  
50 cardiovascular involvement. Cases classified as Class II by the CDC may be classified in  
51 these groups.<sup>33,38</sup>  
52  
53  
54

55 - Fluid resuscitation: It is important to consider the recommendations in recently  
56 published guidelines.<sup>16</sup> In healthcare systems where staff and equipment for advanced  
57  
58  
59  
60

1  
2  
3 airway management are available, up to 40–60 mL/kg (10–20 mL/kg per bolus) of  
4 balanced crystalloids (*Ringer's lactate or Plasma-Lyte*) can be given over the first hour,  
5 titrated to clinical markers of cardiac output, and discontinued if signs of fluid overload  
6 develop. In healthcare systems without the availability of intubation, crystalloid boluses  
7 may only be given in cases of hypotension (decompensated shock); in these cases, up to  
8 40 mL/kg of bolus fluid (10–20 mL/kg per bolus) may be infused over the first hour with  
9 titration to clinical markers of cardiac output, and discontinued if signs of fluid overload  
10 develop. If the child is not hypotensive, but has compensated shock, only maintenance  
11 fluids should be started, avoiding bolus fluids which are associated with worse  
12 outcomes<sup>35-38</sup>.

13  
14  
15  
16  
17  
18  
19  
20  
21 -Vasoactive drugs: According to the clinical condition, most series describe the need for  
22 vasoactive drugs in 10 to 60% of the cases with PIMS-TS. Most patients respond to fluid  
23 resuscitation. If necessary, epinephrine or norepinephrine should be considered according  
24 to the patient's condition.<sup>16,39</sup> Inotropes like dopamine, milrinone and levosimendan were  
25 reported to have been used in PIMS-TS.<sup>38-40</sup>

26  
27  
28  
29 -Antibiotic therapy: If bacterial co-infection is suspected, the first dose is recommended  
30 within the first three hours for sepsis associated with organ dysfunction, or within the first  
31 hour for children with septic shock.<sup>39-41</sup>

### 32 33 34 3. Stabilization with adequate monitoring:

35  
36 If possible, advanced hemodynamic monitoring should be instituted. Cardiac  
37 ultrasound/echocardiography or  $S_{cvo2}$  measurements have been suggested by recent  
38 guidelines<sup>16</sup> and patients with PIMS-TS.<sup>42</sup>

39  
40  
41 4. Timely referral or transfer is desirable in this context. In middle and low-income  
42 countries, it is common for patients to be transferred to higher complexity sites. Patients  
43 who are deteriorating or who may need intensive care should be identified. In the PIMS-  
44 TS of the CDC group, 84% of the cases had to be transferred to paediatric intensive care.  
45  
46  
47  
48  
49  
50  
51  
52  
53  
54  
55  
56  
57  
58  
59  
60  
16,40-42

5. Continuous measurement of processes and corrections must be instituted for a  
continuous quality improvement process.<sup>42</sup>

61  
62  
63  
64  
65  
66  
67  
68  
69  
70  
71  
72  
73  
74  
75  
76  
77  
78  
79  
80  
81  
82  
83  
84  
85  
86  
87  
88  
89  
90  
91  
92  
93  
94  
95  
96  
97  
98  
99  
100  
*b. Specific approach:* It is important to emphasize that, in moderate to severe cases, the  
use of immunomodulatory treatment should be considered. Heterogeneous management  
including human immunoglobulin, systemic steroids, anakinra, tocilizumab and aspirin  
<sup>40,42-45</sup> has been reported in the described series (*supplementary table S1*). The American

1  
2  
3 College of Rheumatology (ACR) recommendations for immunomodulatory therapy<sup>42</sup>  
4 have recently been published. We sought to adapt these recommendations to middle and  
5 low-income countries where resources are limited and each intervention must be  
6 streamlined according to need.  
7  
8  
9

- 10 ⇒ IVIG: High doses (2 gr/kg) should be considered for moderate to severe cases,  
11 particularly those with myocardial involvement. Prior to beginning the infusion,  
12 restored heart function must be verified.<sup>42</sup>  
13  
14 ⇒ Steroids: Steroids have recently been shown to be useful in modifying the clinical  
15 course of the disease in adults with severe pneumonia, particularly if they are on  
16 mechanical ventilation.<sup>43-47</sup> In patients with PIMS-TS, low doses could be  
17 considered in all cases (used in 70% of the series – *supplementary table S1*).  
18 Dosing schemes of 1-2 mg/kg/dose of methylprednisolone or its equivalent three  
19 or four times per day have been recommended. The ACR suggests considering  
20 high doses in cases of shock or in those with a high need for vasopressors, and we  
21 believe this recommendation is very important for middle and low-income  
22 countries, especially considering the frequency of late consults with advanced  
23 disease.  
24  
25 ⇒ Anakinra is suggested by the ACR consensus for use in cases of steroid or IVIG-  
26 refractory PIMS-TS.<sup>42</sup> However, in many countries, its use is not approved, or it  
27 is not available, and other biological agents are used. Prospective studies are  
28 needed to evaluate the efficacy and safety of these medications in PIMS-TS.  
29  
30 ⇒ Anticoagulation and antiplatelet treatment: Anticoagulation has become a  
31 fundamental treatment in adults, considering that there is a procoagulant and  
32 hypofibrinolytic state in severe SARS-CoV-2 infection.<sup>42,47-50</sup> In children with  
33 PIMS-TS it is recommended only in cases of documented thrombosis or in  
34 patients with an echocardiogram ejection fraction less than 35%.<sup>43,47</sup> Aspirin  
35 would also be recommended in patients with thrombocytosis (> 450,000 u/L) or  
36 Kawasaki-like disease criteria.<sup>42,47</sup>  
37  
38  
39  
40  
41  
42  
43  
44  
45  
46  
47  
48  
49  
50  
51  
52

53 The prognosis of the disease is usually good, with patient survival greater than 95% in  
54 different published series.<sup>5,6,42-50</sup> A mortality of 1-2% has been described in the published  
55 series, and up to 15% with cardiovascular sequelae, including aneurysms or  
56 dysfunction.<sup>33,48-50</sup> These patients should be followed up after discharge by inter and  
57  
58  
59  
60

multidisciplinary teams including infectious disease, rheumatology and paediatrics. However, there are incomplete data from all the cases, along with a knowledge gap regarding mild and moderate cases, the natural course and the clinical behavior of the disease.<sup>8,47-50</sup>

| General approach                                                                                                                                                                                                                       | Specific approach                                                                                                                                                                                           |
|----------------------------------------------------------------------------------------------------------------------------------------------------------------------------------------------------------------------------------------|-------------------------------------------------------------------------------------------------------------------------------------------------------------------------------------------------------------|
| 1. Early detection                                                                                                                                                                                                                     | 1. Human immunoglobulin: <ul style="list-style-type: none"> <li>• 2 gr/kg for moderate to severe cases</li> </ul>                                                                                           |
| 2. Immediate, time-sensitive resuscitation <ol style="list-style-type: none"> <li>Oxygen therapy</li> <li>Fluid resuscitation</li> <li>Vasoactive drugs</li> <li>Antibiotic therapy: if bacterial co-infection is suspected</li> </ol> | 2. Steroids: <ul style="list-style-type: none"> <li>• 1-2 mg/kg/dose of methylprednisolone three or four times per day</li> <li>• High doses in cases of shock with high vasopressor requirement</li> </ul> |
| 3. Stabilization with adequate monitoring                                                                                                                                                                                              | 3. Anakinra: <ul style="list-style-type: none"> <li>• Only in cases refractory to steroids and IVIG. Not available in all countries.</li> </ul>                                                             |
| 4. Timely referral or transfer according to the context and available resources                                                                                                                                                        | 4. Anticoagulation is recommended for: <ol style="list-style-type: none"> <li>Documented thrombosis</li> <li>Echocardiogram with an EF of less than 35%</li> </ol>                                          |
| 5. Continuous measurement of processes                                                                                                                                                                                                 | 5. Antiplatelet treatment: recommended for thrombocytosis > 450,000 u/L.                                                                                                                                    |

Table 3. Summary of recommendations for management of PIMT-TS in countries with limited resources.

## Conclusion

PIMS-TS is a new type of presentation of SARS-CoV-2 infection, with an exaggerated inflammatory response and inadequate inflammatory resolution with frequent *-but not exclusive-* digestive and myocardial involvement. It should be considered as a new disease with unique symptoms, a greater variety of clinical courses, and possibly different physiological mechanisms. In middle and low-income countries, studies should be performed to learn more about this disease in these regions and determine if they have different phenotypic behaviors. In addition, the real role of some inflammatory biomarkers and cost-effective therapeutic strategies should be determined.

## Contributors

JFS, DS, RJ, PA, GG, GP conceptualized and designed the literature search. JFS, DS, RJ initiated the search and a first draft. All authors contributed to subsequent drafts. JFS, as group leader, supervised and moderated the search, initial drafts, the overall collation of the figures and tables and final manuscript. All authors approved the final manuscript as submitted and agree to be accountable for all aspects of the work

**Funding** The authors have not declared a specific grant for this research from any funding agency in the public, commercial or not-for-profit sectors.

**Competing interests** No, there are no competing interests.

**Patient consent for publication** Not required.

**Provenance and peer review:** Not commissioned; externally peer reviewed. Data availability statement

**Data are available statement:** no data are available.

**Open access** This is an open access article distributed in accordance with the Creative Commons Attribution Non Commercial (CC BY-NC 4.0) license, which permits others to distribute, remix, adapt, build upon this work non-commercially, and license their derivative works on different terms, provided the original work is properly cited,

appropriate credit is given, any changes made indicated, and the use is non-commercial.

See: <http://creativecommons.org/licenses/by-nc/4.0/>.

**ORCID:** iD Jaime Fernández-Sarmiento <http://orcid.org/0000-0003-2874-2949116>

## REFERENCES

1. World Health Organization. Coronavirus disease 2019 (COVID-19): situation report. Available in: <http://www.who.int/docs/default-source/coronaviruse/situation-reports.2>. 28 Jun 2020.
2. Yang X, Yu Y, Xu J et al. Clinical course and outcomes of critically ill patients with SARS-CoV-2 pneumonia in Wuhan, China: a single-centered, retrospective, observational study. *Lancet Respir Med*. 2020. Epub 2020/02/28. doi: 10.1016/S2213-2600(20)30079-5.
3. Whittaker E, Bamford A, Kenny J et al. Clinical Characteristics of 58 Children with a Pediatric Inflammatory Multisystem Syndrome Temporally Associated with SARS-CoV2-2. *JAMA* 2020 Jun8; e2010369. Doi:10.1001/jama.2020.10369.
4. González-Damrauskas S, Vásquez-Hoyos P, Camporesi A, et al. Pediatric critical care and COVID19. *Pediatrics*. 2020; doi: 10.1542/peds.2020-1766.
5. De Biasi RL, Song X, Delaney M, et al. Severe COVID-19 in children and young adults in the Washington, DC Metropolitan Region. *J Pediatr* 2020. <https://doi.org/10.1016/j.jpeds.2020.05.007>. In press.
6. Riphagen S, Gomez X, Gonzalez-Martinez et al. Hyperinflammatory shock in children during COVID-19 pandemic. *Lancet* 2020 May 7. [https://doi.org/10.1016/S0140-6736\(20\)31094-1](https://doi.org/10.1016/S0140-6736(20)31094-1). S0140-6736(20)31094- 1, ahead of print.
7. Verdoni L, Mazza A, Gervasoni A, et al. An outbreak of severe Kawasaki-like disease at the Italian epicenter of the SARS-CoV-2 epidemic: an observational cohort study. *Lancet* 2020. [https://doi.org/10.1016/S0140-6736\(20\)31103-X](https://doi.org/10.1016/S0140-6736(20)31103-X). ahead of print.
8. Belhadjer Z, Meot M, Bajolle F, et al. Acute heart failure in multisystem inflammatory syndrome in children (MIS-C) in the context of global SARS-CoV-2. pandemic. *Circulation* 2020 May 17. <https://doi.org/10.1161/CIRCULATIONAHA.120.048360>. ahead of print.

- 1  
2  
3 9.Grimaud M, Starck J, Levy M et al. Acute myocarditis and multisystem inflammatory  
4 emerging disease following SARS-CoV-2 infection in critically ill children. *Ann*  
5 *Intensive Care* 2020; 10:69.
- 6  
7  
8 10. Royal College of Paediatrics and Child Health. Available in:  
9 [https://www.rcpch.ac.uk/resources/guidance-paediatric-multisystem-inflammatory-](https://www.rcpch.ac.uk/resources/guidance-paediatric-multisystem-inflammatory-syndrome-temporally-associated-covid-19-pims)  
10 [syndrome-temporally-associated-covid-19-pims.](https://www.rcpch.ac.uk/resources/guidance-paediatric-multisystem-inflammatory-syndrome-temporally-associated-covid-19-pims)
- 11  
12  
13 11. CDC. Multisystem Inflammatory Syndrome in Children (MIS-C) associated with  
14 coronavirus disease 2019 (COVID-19).  
15 <https://emergency.cdc.gov/han/2020/han00432.asp>.
- 16  
17  
18 12. WHO. Multisystem inflammatory syndrome in children and adolescents with COVID  
19 19 Scientific brief. Available en: [https://www.who.int/publications-detail/multisystem-](https://www.who.int/publications-detail/multisystem-inflammatory-syndrome-in-children-and-adolescents-with-covid-19)  
20 [inflammatory-syndrome-in-children-and-adolescents-with-covid-19.](https://www.who.int/publications-detail/multisystem-inflammatory-syndrome-in-children-and-adolescents-with-covid-19) 15 May 2020.
- 21  
22  
23 13. Golfred-Cato S, Bryant B, Leung J et al. COVID-19- Associated Multiystem  
24 Inflammatory syndrome in Children- United States, March-July 2020. Available in  
25 <https://www.cdc.gov/mmwr/volumes/69/wr/pdfs/mm6932e2-H.pdf>.
- 26  
27  
28 14. Hoang A, Chroath K, Moreira A et al., COVID-19 in 7780 pediatric patients: A  
29 systematic review, *E-Clinical Medicine* (2020), [https://doi.org/](https://doi.org/10.1016/j.eclinm.2020.100433)  
30 [10.1016/j.eclinm.2020.100433](https://doi.org/10.1016/j.eclinm.2020.100433).
- 31  
32  
33 15. Tan L, Wang Q, Zhang D, et al. Lymphopenia predicts disease severity of COVID-  
34 19: a descriptive and predictive study. *Signal Transduct Target Ther.* 2020;5(1):33.  
35 Published 2020 Mar 27. doi:10.1038/s41392-020-0148-4.
- 36  
37  
38 16. Weiss SL, Peters MJ, Alhazzani W, et al. Surviving sepsis campaign international  
39 guidelines for the management of septic shock and sepsis-associated organ dysfunction  
40 in children. *Intensive Care Med* 2020;46 (Suppl. 1):10–67.
- 41  
42  
43 17. Alhazzani W, Moller MH, Arabi YM, et al. Surviving sepsis campaign: guidelines on  
44 the management of critically ill adults with Coronavirus Disease 2019 (COVID-19).  
45 *Intensive Care Med* 2020;46(5):854–87.
- 46  
47  
48 18. Jaume M, Yip MS, Cheung CY et al. Anti-severe acute respiratory syndrome  
49 coronavirus spike antibodies trigger infection of human immune cells via a pH- and  
50 cysteine protease-independent Fc. R pathway. *Journal of virology.* 2011;85(20):10582-  
51 97. 12.
- 52  
53  
54 19. Fernández-Sarmiento J, Salazar LM, Carcillo J. The endothelial glycocalyx: a  
55 fundamental determinant of vascular permeability in sepsis. *Ped Crit Care*  
56 2020;21e:e291-e300.
- 57  
58  
59  
60

- 1  
2  
3 20. Carcillo JA, Kernan KK, Horvat CM et al. Why and How Is Hyperferritinemic Sepsis  
4 Different from Sepsis Without Hyperferritinemia? *Pediatr Crit Care Med.*  
5 2020;21(5):509-512. doi:10.1097/PCC.0000000000002285.  
6  
7  
8 21. Rosário C, Zandman-Goddard G, Meyron-Holtz EG, et al: The Hyperferritinemic  
9 syndrome: Macrophage activation syndrome, Still's disease, septic shock and  
10 catastrophic antiphospholipid syndrome. *BMC Med* 2013; 11:185.  
11  
12 22. Pérez-Toledo M, Faustini S, Jossi S et al. Serology confirms SARS-CoV-2 infection  
13 in PCR-negative children presenting with Pediatric Inflammatory Multi-system  
14 syndrome. Institute of Immunology and Immunotherapy, University of Birmingham UK.  
15 Doi: <https://doi.org/10.1101/2020.06.05.20123117>. Online 07 June 2020.  
16  
17 23. Kam YW, Kien F, Roberts A. et al. Antibodies against trimeric S glycoprotein protect  
18 hamsters against SARS-CoV challenge despite their capacity to mediate FcγRII-  
19 dependent entry into B cells in vitro. *Vaccine.* 2007;25(4):729-40.  
20  
21 24. Wang SF, Tseng SP, Yen CH et al. Antibody-dependent SARS coronavirus infection  
22 is mediated by antibodies against spike proteins. *Biochemical and biophysical research*  
23 *communications.* 2014;451(2):208-14.  
24  
25 25. Iba T, Levy JH, Connors JM et al. The unique characteristics of COVID-19  
26 coagulopathy. *Crit Care.* 2020;24(1):360. Published 2020 Jun 18. doi:10.1186/s13054-  
27 020-03077-0.  
28  
29 26. Iba T, Levy JH. Sepsis-induced coagulopathy and disseminated intravascular  
30 coagulation. *Anesthesiology.* 2020;132(5):1238–45.  
31  
32 27. Waltuch T, Gill P, Zinns LE et al. Features of COVID-19 post-infectious cytokine  
33 release syndrome in children presenting to the emergency department [published online  
34 ahead of print, 2020 May 8. *Am J Emerg Med.* 2020; S0735- 6757(20)30403-4.  
35 doi:10.1016/j.ajem.2020.05.058.  
36  
37 28. Varga Z, Flammer AJ, Steiger P, et al. Endothelial cell infection and endothelitis in  
38 COVID-19. *Lancet.* 2020;395(10234):1417–8.  
39  
40 29. Yu B, Li X, Chen J, et al. Evaluation of variation in D-dimer levels among COVID-  
41 19 and bacterial pneumonia: a retrospective analysis [published online ahead of print,  
42 2020 Jun 10]. *J Thromb Thrombolysis.* 2020;1-10. doi:10.1007/s11239-020-02171-y.  
43  
44 30. Bates SM. D-dimer assays in diagnosis and management of thrombotic and bleeding  
45 disorders. *Semin Thromb Hemost.* 2012;38(7):673-682. doi:10.1055/s-0032-1326782  
46  
47  
48  
49  
50  
51  
52  
53  
54  
55  
56  
57  
58  
59  
60



- 1  
2  
3 31. Trivedi P, Cheeseman P, Mowat AP. Serum hyaluronic acid in healthy infants and  
4 children and its value as a marker of progressive hepatobiliary disease starting in infancy.  
5 Clin Chim Acta. 1993;215(1):29-39. doi:10.1016/0009-8981(93)90246-z.  
6  
7  
8 32. Tan W, Aboulhosn J. The cardiovascular burden of coronavirus disease 2019  
9 (COVID-19) with a focus on congenital heart disease. Int J Cardiol. 2020;309: 7077. doi:  
10 10.1016/j.ijcard.2020.03.063.  
11  
12  
13 33. Cheung E, Zachariah P, Gorelik M et al. Multisystem Inflammatory Syndrome  
14 Related to COVID-19 in Previously Healthy Children and Adolescents in New York City.  
15 JAMA. Published online June 8, 2020. Doi:10.1001/jama.2020.10374  
16  
17 34. Harwood R, Allin B, Jones C et al. A national consensus management pathway for  
18 paediatric inflammatory multisystem syndrome temporally associated with COVID-19  
19 (PIMS-TS): results of a national Delphi process. Lancet Child Adolesc Health. 2020  
20 Published Online September 18 doi.org/10.1016/S352-4642(20)30304-7  
21  
22 35. Davis AL, Carcillo JA, Aneja RK, et al. American College of Critical Care Medicine  
23 Clinical Practice Parameters for Hemodynamic Support of Pediatric and Neonatal Septic  
24 Shock. Crit Care Med. 2017; 45(6):1061-93.  
25  
26 36. Wip C, Napolitano L. Bundles to prevent ventilator-associated pneumonia: how  
27 valuable are they? Curr Open Infect Dis. 2009; 22(2):159-66.  
28  
29 37. Kohn Loncarica G, Fustiñana A, Jabornisky R. Recommendations for the  
30 management of pediatric septic shock in the first hour (part I). Arch Argent Pediatr  
31 2019;117(1): e14-e23.  
32  
33 38. Kaushik S, Aydin SI, Derespina KR, et al. Multisystem Inflammatory Syndrome in  
34 Children (MIS-C) Associated with SARS-CoV-2 Infection: A Multi-institutional Study  
35 from New York City [published online ahead of print, 2020 Jun 14]. J Pediatr.  
36 2020;S0022-3476(20)30747-239.  
37  
38 39. National Institute for Health and Care Excellence. Sepsis: Recognition, Diagnosis and  
39 Early Management. London, 2016;51. [Accessed on: June 27th, 2020]. Available at:  
40 [https://www.nice.org.uk/guidance/ng51/resources/sepsis-recognition-diagnosis-and-](https://www.nice.org.uk/guidance/ng51/resources/sepsis-recognition-diagnosis-and-early-manage-ment-pdf-1837508256709)  
41 [early-manage-ment-pdf-1837508256709](https://www.nice.org.uk/guidance/ng51/resources/sepsis-recognition-diagnosis-and-early-manage-ment-pdf-1837508256709).  
42  
43 40. Ramcharan, T, Nolan, O, Lai C.Y. et al. Paediatric Inflammatory Multisystem  
44 Syndrome: Temporally Associated with SARS-CoV-2 (PIMS-TS): Cardiac Features,  
45 Management and Short-Term Outcomes at a UK Tertiary Paediatric Hospital. *Pediatr*  
46 *Cardiol* (2020). <https://doi.org/10.1007/s00246-020-02391-2>.  
47  
48  
49  
50  
51  
52  
53  
54  
55  
56  
57  
58  
59  
60

- 1  
2  
3 41. Fernández-Sarmiento J, Carcillo JA, Salinas CM, et al. Effect of a sepsis educational  
4 intervention on hospital stay. *Pediatr Crit Care Med*. 2018;19: e321–e328.  
5  
6 42. American College of Rheumatology. Clinical Guidance for Pediatric Patients with  
7 multisystem inflammatory syndrome in children (MIS-C) associated with SARS-CoV-2  
8 and hyperinflammation in covid-19. Available in  
9 <https://www.rheumatology.org/announcements#PediatricClinicalGuidance>. Jun3 17  
10 2020.  
11  
12 43. Low-cost dexamethasone reduces death by up to one third in hospitalized patients  
13 with severe respiratory complications of COVID-19 [Internet]. RECOVERY  
14 (Randomised Evaluation of COVID-19 Therapy) University of Oxford. 2020 [cited 2020  
15 Jun 18]. Available from: [https://www.recoverytrial.net/news/low-cost-dexamethasone-](https://www.recoverytrial.net/news/low-cost-dexamethasone-reduces-death-by-up-to-one-third-in-hospitalised-patients-with-severe-respiratory-complications-of-covid-19)  
16 [reduces-death-by-up-to-one-third-in-hospitalised-patients-with-severe-respiratory-](https://www.recoverytrial.net/news/low-cost-dexamethasone-reduces-death-by-up-to-one-third-in-hospitalised-patients-with-severe-respiratory-complications-of-covid-19)  
17 [complications-of-covid-19](https://www.recoverytrial.net/news/low-cost-dexamethasone-reduces-death-by-up-to-one-third-in-hospitalised-patients-with-severe-respiratory-complications-of-covid-19).  
18  
19 44. Rajasekaran S, Kruse K, Kovey K, et al. Therapeutic role of anakinra, an interleukin-1  
20 receptor antagonist, in the management of secondary hemophagocytic  
21 lymphohistiocytosis/ sepsis/multiple organ dysfunction/macrophage activating syndrome  
22 in critically ill children. *Pediatr Crit Care Med* 2014;15(5):401–8.  
23  
24 45. Toubiana J, Poiralut C, Corsia A et al. Kawasaki-like multisystem inflammatory  
25 syndrome in children during the covid-19 pandemic in Paris, France: prospective  
26 observational study. *BMJ* 2020;369m2094.  
27  
28 46. Pouletty M, Borocco C, Ouldali N et al. Paediatric multisystem inflammatory  
29 syndrome temporally associated with SARS-CoV-2 mimicking Kawasaki disease (Kawa-  
30 COVID-19): a multicentre cohort. *Ann Rheum Dis* 2020; 0:1-8.  
31  
32 47. Capone CA, Subramony A, Sweberg T et al. Characteristics, Cardiac involvement,  
33 and Outcomes of Multisystem Inflammatory Disease of Childhood (MIS-C) Associated  
34 with SARS-CoV-2 Infection, *The Journal of Pediatrics* (2020), doi:  
35 <https://doi.org/10.1016/j.jpeds.2020.06.044>.  
36  
37 48. Feldstein L.R, Rose E.B, Horwitz J.P et al. Multisystem Inflammatory Syndrome in  
38 U.S. Children and Adolescents. *N Engl J Med* 2020 June 29.  
39 Doi:10.1056/NEJMoa2021680.  
40  
41 49. Dufort E, Koumnas E, Chow E et al. Multisystem Inflammatory Syndrome in  
42 Children in New York State. *N Engl J Med* 2020 Jun 29. Doi:10.1056/NEJMoa2021756  
43  
44  
45  
46  
47  
48  
49  
50  
51  
52  
53  
54  
55  
56  
57  
58  
59  
60

1  
2  
3 50. Prata-Barbosa A, Lima-Setta F, Rodrigues dos Santos G et al. Pediatric patients with  
4 COVID-19 admitted to intensive care units in Brazil: a prospective multicenter study.  
5 Jornal de Pediatria. 2020;96(5):582-592.  
6  
7  
8  
9  
10  
11  
12  
13  
14  
15  
16  
17  
18  
19  
20

21 *Figure 1.* Selection process. We followed the PRISMA guidelines for reporting in  
22 systematic reviews and meta-analyses  
23  
24  
25  
26

27 *Table 1.* Demographic characteristics of patients with PIMS-TS  
28  
29

30 *Table 2.* RCPCH, CDC and WHO Definition Criteria for Paediatric Inflammatory  
31 Multisystem Syndrome Temporally associated with COVID-19  
32  
33  
34

35 *Table 3.* Summary of recommendations for management of PIMT-TS in countries with  
36 limited resources.  
37  
38  
39

40 *Supplementary table S1.* Clinical and echocardiographic findings, and treatments  
41 instituted in the described series of PIMS-TS patients.  
42  
43  
44  
45  
46  
47  
48  
49  
50  
51  
52  
53  
54  
55  
56  
57  
58  
59  
60

1  
2  
3  
4  
5  
6  
7  
8  
9  
10  
11  
12  
13  
14  
15  
16  
17  
18  
19  
20  
21  
22  
23  
24  
25  
26  
27  
28  
29  
30  
31  
32  
33  
34  
35  
36  
37  
38  
39  
40  
41  
42  
43  
44  
45  
46  
47  
48  
49  
50  
51  
52  
53  
54  
55  
56  
57  
58  
59  
60

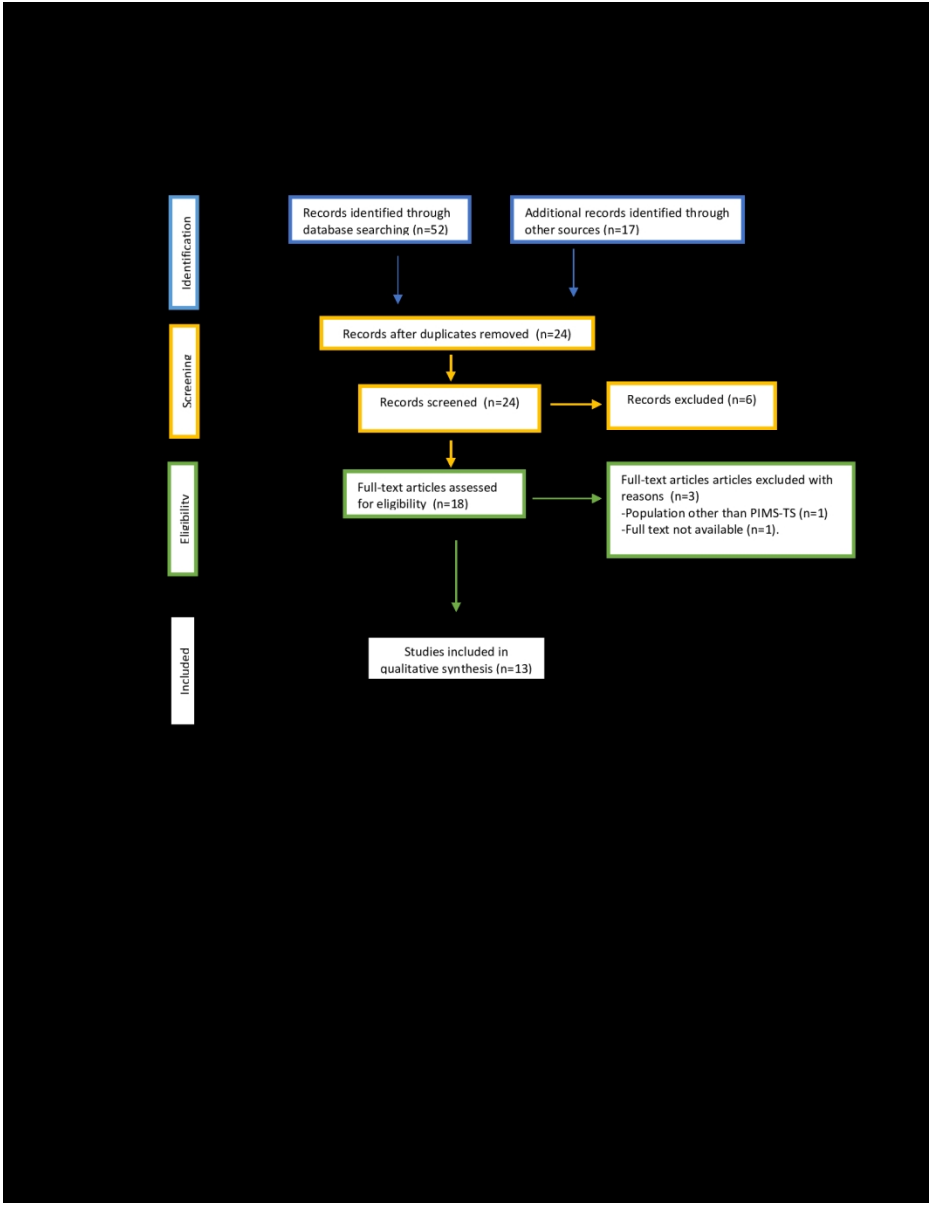

215x279mm (200 x 200 DPI)

| Author                     | Clinical presentation                                                                                                                                                                                                                                                                         | ECHO                                                                                                                                                                          | SARS-CoV-2 test                                                                                                           | Organ support                                                                                                               | Treatment                                                                                                   | Outcome / Died                                        |
|----------------------------|-----------------------------------------------------------------------------------------------------------------------------------------------------------------------------------------------------------------------------------------------------------------------------------------------|-------------------------------------------------------------------------------------------------------------------------------------------------------------------------------|---------------------------------------------------------------------------------------------------------------------------|-----------------------------------------------------------------------------------------------------------------------------|-------------------------------------------------------------------------------------------------------------|-------------------------------------------------------|
| <b>Whittaker et al [3]</b> | Fever 100%, Headache 26% Vomiting 45% Diarrhea 52%, Abdominal pain 53%, Rash 52% Conjunctivitis 45% Lymphadenopathy 16% Mucus membrane, changes/red cracked lips 29% Swollen hands and feet 16%, Respiratory symptoms 21%.<br><b>Fever + elevated inflammatory markers – 40%, Shock - 50%</b> | Left ventricular dysfunction 62% (18/29)<br>Abnormally dilated coronary arteries (z score >2) 8/55<br>Giant coronary artery aneurysms 2<br>Coronary artery aneurism 14% (n=8) | RT-PCR SARS-CoV-2 + 26%<br>IgG antibody SARS-CoV-2 + 87%<br><br>78% had evidence of current or prior SARS-CoV-2 infection | PICU 50%<br>Acute kidney injury 22%<br>Shock + inotropic support 47%<br>MV 43%<br>ECMO 5%                                   | Inotropic support 47%<br>IVIG 71%<br>Corticosteroids 64%<br>Anakinra 5%<br>Infliximab 14%                   | Death 2%                                              |
| <b>Riphagen et al [6]</b>  | Fever 8/8<br>Diarrhoea 7/8<br>Abdominal pain 6/8<br>Vomiting 4/8<br>Conjunctivitis 5/8<br>Rash 4/8<br>Vasoplegic shock 8/8                                                                                                                                                                    | 7/8 ventricular dysfunction<br>Echobright coronary vessels<br>1/8 giant coronary aneurysm                                                                                     | SARS-CoV-2 negative 5/8<br>SARS-CoV-2 positive 2/8<br>Family exposure 4/8                                                 | Inotropic/vasopressor support 8/8, MV 5/8, HFNC 1/8, NIV 3/8, RRT 1/8, VA-ECMO 1/8 (arrhythmia with refractory shock, died) | IVIG 8/8, Corticoids 5/8<br>Aspirin 3/8, Heparin 1/8, Antibiotics 8/8, Infliximab 1/8                       | 1 died<br>6/8 alive<br>PICU length of stay 3 – 7 days |
| <b>Verdoni et al [7]</b>   | Classic form of Kawasaki 50%, Incomplete form of Kawasaki disease 50%<br>Kdss and MAS 50%<br>Diarrhoea 60%<br>Meningeal signs 40%<br>Drowsiness 10%                                                                                                                                           | <b>Anormal ECHO 60%</b><br><b>Aneurism 10%</b><br><b>FEVE &lt; 50% – 50%</b><br>Mitral valve regurgitation 10%<br>Pericardial effusion 40%                                    | RT-PCR SARS-CoV-2 + 20%<br>Serology for SARS-CoV-2 antibodies – 80% were IgG +, and 3 were also IgM +                     |                                                                                                                             | Inotropic support 20%<br>Adjunctive steroid treatment 80%<br>IVIG 100%<br>Aspirin 20%                       | None                                                  |
| <b>Belhadjer et al [8]</b> | Asthenia 100%<br>Fever 100%<br>GI symptoms 83% (2 children underwent emergency operation for suspected appendicitis)<br>Respiratory distress 65%                                                                                                                                              | Coronary artery dilatation (z score > 2) 17%<br>Aneurysm 0<br>LVEF < 30% - 28%<br>LVEF 30-50% - 72%                                                                           | SARS-CoV-2 was confirmed 88.5%<br>RT-PCR-SARS-CoV-2 + 34%<br>Fecal PCR 6%<br>Antibodies + 86%                             | Respiratory support 94% (IMV 62%; NIV 32%)<br>VA-ECMO 28%                                                                   | Inotropic support 80%<br>IVIG 71%<br>Corticosteroids 34%<br>Anakinra 8%<br>Anticoagulation with heparin 65% | None                                                  |

|                                  |                                                                                                                                                                                                                                                         |                                                                                                                            |                                                                                                                                                    |                                                                                                   |                                                                                                                   |                                             |
|----------------------------------|---------------------------------------------------------------------------------------------------------------------------------------------------------------------------------------------------------------------------------------------------------|----------------------------------------------------------------------------------------------------------------------------|----------------------------------------------------------------------------------------------------------------------------------------------------|---------------------------------------------------------------------------------------------------|-------------------------------------------------------------------------------------------------------------------|---------------------------------------------|
|                                  | Rhinorrhea 43%<br>Adenopathy 60%<br>Rash 57%<br>Meningism 31%<br>At admission to the ICU,<br>80% were in cardiogenic<br>shock                                                                                                                           |                                                                                                                            |                                                                                                                                                    |                                                                                                   |                                                                                                                   |                                             |
| <b>Grimaud et al [9]</b>         | Fever 100%, Abdominal pain 100%, Rash 50%, Conjunctivitis 30%, Adenitis 20%, Tachycardia 100% Hypotension 100% (75% clinical signs of vasoplegia)                                                                                                       | LVEF 35% (IQR 25-55)                                                                                                       | SARS-CoV-nasopharyngeal swabs + 50% SARS-CoV-2 antibodies + 100% (15/15), <b>95% had identified SARS-CoV-2 infection on PCR and/or by serology</b> | NIV 55%,IMV 40%, HFNO 5%,Respiratory support in all patient was indicated for hemodynamic support | IVIG100%,Corticosteroids 10%, Anakinra 5%, Tocilizumab 5%, Inotropic/vasopressor support 95%                      | None                                        |
| <b>Cheung et al [33]</b>         | Fever 100% GI symptoms 88% Shock at presentation 76% Rash 71%, Conjunctivitis 65% Lip redness/swelling 65% Neurologic symptoms 47%, Respiratory symptoms 41%, Myalgia 35%, Lymphadenopathy 35%, Hypoxia 18% Criteria for KD 47% Incomplete Kawasaki 29% | FEVE mildly decreased 29% FEVE mild-moderately decreased 24% FEVE moderate-severely decreased 12% Pericardial effusion 47% | RT-PCR SARS-CoV-2 + 47% Serology for SARS-CoV-2 antibodies → 53%                                                                                   | PICU 88%                                                                                          | IVIG 76% Methylprednisolone 71% Hydrocortisone 21% Enoxaparin prophylaxis 59% Enoxaparin treatment 6% Aspirin 24% | None                                        |
| <b>Golfred-Cato S et al [13]</b> | Fever 100% Bilateral conjunctival injection 48.4% Oral mucose changes 23% Rash 55.3%                                                                                                                                                                    | Abnormal ECHO with coronary-artery aneurysms 18.6%                                                                         | RT-PCR 25.8% Serology positive 46.1% RT-PCR and serology positive 27.2%                                                                            | PICU 63.9% MV 13.1% Vasoactives 44.9%                                                             | IVIG 80.5% Steroids 62.8% Antiplatelet medication 58.6% Anticoagulation 44.2%                                     | Died 1.8% Organs systems involved 4-5 61.6% |
| <b>Kaushik et al [38]</b>        | Fever 93%, Abdominal pain 63%, Nausea/emesis 69%, Diarrhea 48%                                                                                                                                                                                          | Pericardial effusion 46%                                                                                                   | SARS-CoV-2 antibody + 81%                                                                                                                          | NIV 36% IMV 15% ECMO 3%                                                                           | IVIG 54%, Corticosteroids 51%, Tocilizumab 36%                                                                    | Death 3%                                    |

|                             |                                                                                                                                                                                                                                                                                                                                                                                         |                                                                                                                                                                                                                                                                     |                                                                                                                                                                                                                                                                            |                                                              |                                                                                                                                                                                                                   |      |
|-----------------------------|-----------------------------------------------------------------------------------------------------------------------------------------------------------------------------------------------------------------------------------------------------------------------------------------------------------------------------------------------------------------------------------------|---------------------------------------------------------------------------------------------------------------------------------------------------------------------------------------------------------------------------------------------------------------------|----------------------------------------------------------------------------------------------------------------------------------------------------------------------------------------------------------------------------------------------------------------------------|--------------------------------------------------------------|-------------------------------------------------------------------------------------------------------------------------------------------------------------------------------------------------------------------|------|
|                             | Hypotension 63%,<br>Mucocutaneous,<br>involvement 21%<br>Conjunctivitis 36%<br>Rash 42%, Shortness of<br>breath 33%<br>Neurologic involvement<br>12%                                                                                                                                                                                                                                    | LVEF median 46.6<br>(IQR 39.5, 52.8)<br>LVEF < 30%: 12%<br>LVEF 30-50%: 53%<br>Recovered LV function<br>prior to discharge 95%                                                                                                                                      | RT-PCR SARS-CoV-2<br>+ 33%<br>18% tested + for both                                                                                                                                                                                                                        | Intra-aortic balloon<br>pump support 3%                      | Remdesivir 21%, Anakinra<br>12%, Convalescent plasma<br>therapy 3%, Aspirin 24%<br>Anticoagulation, prophylaxis<br>15%, Anticoagulation,<br>therapeutic 81% Antibiotics<br>> 48h 45%<br>Vasopressor/inotropes 51% |      |
| <b>Ramcharan et al [40]</b> | Fever 100%<br>GI symptoms 87%<br>Incomplete KD 53%                                                                                                                                                                                                                                                                                                                                      | 93% coronary artery<br>abnormalities<br>LVEF median on<br>admission 51%                                                                                                                                                                                             | 13% described typical<br>COVID-19 symptoms<br>in the previous two<br>months<br>20% related contact<br>with family member<br>with COVID-19                                                                                                                                  | Respiratory support<br>53%<br>Inotrope or vasopressor<br>67% | IVIG 67% (10/15), of whom<br>2 received a second dose<br>Methylprednisolone 33%<br>73% were discharged on<br>low dose aspirin<br>Antibiotic 100%                                                                  | None |
| <b>Toubiana et al [45]</b>  | Recent history of viral-<br>like symptoms was report<br>in 43%<br>Median duration between<br>these symptoms and the<br>onset of signs and<br>symptoms of Kawasaki<br>disease was 45 days.<br>Complete presentation of<br>KD 52%, Abdominal<br>symptoms 95%, Lips and<br>oral cavity changes 76%<br>Conjunctivitis 81%<br>Rash 76%, Changes to<br>extremities 48%<br>Lymphadenopathy 57% | Myocarditis 76%<br>(LVEF range between<br>10 and 57%)<br>38% coronary artery<br>abnormalities: 24%<br>which consisted of<br>dilations (z score<br>between 2.0 and 2.5);<br>14% with increased<br>coronary visibility<br>No coronary<br>aneurysms were<br>identified | History of recent<br>contact with people<br>with viral-like<br>symptoms was + in<br>48%<br>Median interval<br>between reported<br>contact and KD was 36<br>days<br>RT-PCR-SARS-CoV-2<br>+ 38%<br>IgG antibodies SARS-<br>CoV-2 + 90%<br>9.5% negative<br>Serology and PCR) | PICU 81%<br>Vasoactive agents 71%<br>MV 52%                  | IVIG 100% (24% needed a<br>second dose)<br>Low dose aspirin (3-<br>5mg/kg/day) 100%<br>Corticosteroids (2-<br>10mg/kg/day) 48%<br>Antibiotic 86%                                                                  | None |
| <b>Pouletty et al [46]</b>  | Fever 100%<br>Respiratory signs 12%<br>GI signs 81%<br>Anosmia 6%                                                                                                                                                                                                                                                                                                                       | Abnormal ECHO 69%<br>Coronary dilatation<br>19% (median z score<br>2.6)                                                                                                                                                                                             | Family c/s COVID-19<br>infection 75%<br>First infectious<br>exposure-                                                                                                                                                                                                      |                                                              | IVIG 93%<br>(Second infusion 335)<br>Steroids 25%<br>Anakinra 6%                                                                                                                                                  | None |

|                                 |                                                                                                                                                                                                         |                                                                                                                                             |                                                                                                                                                               |                                                                      |                                                                                                                                                           |                                                                                                                  |
|---------------------------------|---------------------------------------------------------------------------------------------------------------------------------------------------------------------------------------------------------|---------------------------------------------------------------------------------------------------------------------------------------------|---------------------------------------------------------------------------------------------------------------------------------------------------------------|----------------------------------------------------------------------|-----------------------------------------------------------------------------------------------------------------------------------------------------------|------------------------------------------------------------------------------------------------------------------|
|                                 | Neurological signs 56%<br>Rash 81%<br>Conjunctivitis 94%<br>Hands and feet edema/erythema 68%<br>Dry cracked lips 87%<br>Lymphadenopathy 37%<br>Haemodynamic failure 69%<br>Complete KD 62%<br>KDSS 44% | No aneurysm<br>Myocarditis 44% (median LVEF 35%)<br>Pericarditis 25%                                                                        | hospitalization 21 days (IQR 21-24)<br>RT-PCR-SARS-CoV-2 all sites + 69%<br>Serology IgG + 87%                                                                |                                                                      | Tocilizumab 6%<br>AAS (30-50mg/kg) 52%<br>AAS anti-aggregant dose 50%                                                                                     |                                                                                                                  |
| <b>Caponi et al [47]</b>        | Fever 100%<br>GI symptoms 97%<br>Neurocognitive symptoms 58%<br>Respiratory symptoms 52%<br>Shock 75%<br>Complete KD 64%<br>HD without shock 76%                                                        | Any coronary abnormality 48% (Z score $\geq 2.5$ – 15%; Z score 2-2.49 – 9%)<br>Any dysfunction 58%: (LVEF 45-54% - 33%; LVEF 35-44% - 24%) | IgG + and Nucleic acid amplification + 18%<br>IgG + and Nucleic acid amplification negative 73%<br>Nucleic acid amplification +, serology test unavailable 9% | PICU 79%<br>MV 18%<br>Inotrope/vasopressor support 76%               | IVIG 100%<br>2 <sup>nd</sup> dose IVIG 33%<br>Methylprednisolone 70%<br>Aspirin 88%<br>Anakinra 12%<br>Tocilizumab 9%<br>Infliximab 13%<br>Enoxaparin 42% | None                                                                                                             |
| <b>Feldstein L.R et al [48]</b> | Fever 100%<br>Bilateral conjunctival injection 55%<br>Oral mucose changes 42%<br>Peripheral extremity changes 37%<br>Rash 59%                                                                           | Abnormal ECHO with coronary-artery aneurysms 9%                                                                                             | RT-PCR or antibody testing 70%                                                                                                                                | PICU 80%<br>MV 20%<br>Inotrope or vasopressor support 48%<br>ECMO 4% | IVIG 77%<br>Secon dose 21%<br>Systemic glucocorticoid 49%<br>Interleukin-6 inhibitor 8%<br>Interleukin-1Ra inhibitor 13%<br>Anticoagulation 47%           | 28% were still hospitalized as of May 20, 2020, and 4 patients (2%) died, 2 of whom had previously been healthy. |
| <b>Dufort E et al (49)</b>      | Fever 100%, abdominal pain 61%, rash 60%,conjunctivitis 56%                                                                                                                                             | Abnormal ECHO with coronary-artery aneurysm 9%                                                                                              | RT-PCR 51%, IgG antibodies 99%                                                                                                                                | PICU 80%, MV 10%, Vasopressor support 62%, ECMO 4%                   | IVIG 48%<br>Systemic glucocorticoids 64%                                                                                                                  | Death 2%, shock 10%, myocarditis 53%                                                                             |



1  
2  
3  
4 *Abbreviations: MV: mechanical ventilation, HFNC: high flow nasal cannula, NIV:noninvasive ventilation, RRT:renal replacement therapy, VA-*  
5 *ECMO: venu-arterial extracorporeal membrane oxygenation, PCR: protein C reactive, IVIG: immunoglobulin, FEVE: fraction ejection*  
6 *ventricular, RT-PCR: real time polymerase chain reaction, PICU: pediatric intensive care unit, KD:Kawasaki disease*  
7

8 *Supplementary File. Table S1. Clinical findings, echocardiographic and treatments instituted in the described series of PIMS-TS*  
9  
10  
11  
12  
13  
14  
15  
16  
17  
18  
19  
20  
21  
22  
23  
24  
25  
26  
27  
28  
29  
30  
31  
32  
33  
34  
35  
36  
37  
38  
39  
40  
41  
42  
43  
44  
45  
46

# BMJ Paediatrics Open

## Paediatric Inflammatory Multisystem Syndrome Temporally associated with COVID-19 (PIMS-TS): a narrative review and the viewpoint of the Latin American Society of Pediatric Intensive Care (SLACIP) Sepsis Committee

|                               |                                                                                                                                                                                                                                                                                                                                                                                                                                                  |
|-------------------------------|--------------------------------------------------------------------------------------------------------------------------------------------------------------------------------------------------------------------------------------------------------------------------------------------------------------------------------------------------------------------------------------------------------------------------------------------------|
| Journal:                      | <i>BMJ Paediatrics Open</i>                                                                                                                                                                                                                                                                                                                                                                                                                      |
| Manuscript ID                 | bmjpo-2020-000894.R3                                                                                                                                                                                                                                                                                                                                                                                                                             |
| Article Type:                 | Review                                                                                                                                                                                                                                                                                                                                                                                                                                           |
| Date Submitted by the Author: | 29-Dec-2020                                                                                                                                                                                                                                                                                                                                                                                                                                      |
| Complete List of Authors:     | Fernández-Sarmiento, Jaime ; Fundación Cardioinfantil Instituto de Cardiología, ; Universidad de La Sabana, De Souza, Daniela; Universidade de Sao Paulo Hospital Universitario de Sao Paulo<br>Jabornisky, Roberto; Universidad Nacional del Nordeste<br>Gonzalez , Gustavo Ariel ; Hospital Churruca Visca<br>Arias López, Maria del Pilar ; Ricardo Gutierrez Children's Hospital<br>Palacio , Gladys ; Ricardo Gutierrez Children's Hospital |
| Keywords:                     | Mortality, Pathology, Syndrome, Virology, Therapeutics                                                                                                                                                                                                                                                                                                                                                                                           |
|                               |                                                                                                                                                                                                                                                                                                                                                                                                                                                  |

SCHOLARONE™  
Manuscripts



I, the Submitting Author has the right to grant and does grant on behalf of all authors of the Work (as defined in the below author licence), an exclusive licence and/or a non-exclusive licence for contributions from authors who are: i) UK Crown employees; ii) where BMJ has agreed a CC-BY licence shall apply, and/or iii) in accordance with the terms applicable for US Federal Government officers or employees acting as part of their official duties; on a worldwide, perpetual, irrevocable, royalty-free basis to BMJ Publishing Group Ltd ("BMJ") its licensees and where the relevant Journal is co-owned by BMJ to the co-owners of the Journal, to publish the Work in this journal and any other BMJ products and to exploit all rights, as set out in our [licence](#).

The Submitting Author accepts and understands that any supply made under these terms is made by BMJ to the Submitting Author unless you are acting as an employee on behalf of your employer or a postgraduate student of an affiliated institution which is paying any applicable article publishing charge ("APC") for Open Access articles. Where the Submitting Author wishes to make the Work available on an Open Access basis (and intends to pay the relevant APC), the terms of reuse of such Open Access shall be governed by a Creative Commons licence – details of these licences and which [Creative Commons](#) licence will apply to this Work are set out in our licence referred to above.

Other than as permitted in any relevant BMJ Author's Self Archiving Policies, I confirm this Work has not been accepted for publication elsewhere, is not being considered for publication elsewhere and does not duplicate material already published. I confirm all authors consent to publication of this Work and authorise the granting of this licence.

1  
2  
3  
4  
5  
6  
7  
8  
9  
10  
11  
12

**Paediatric Inflammatory Multisystem Syndrome Temporally  
associated with COVID-19 (PIMS-TS): a narrative review and the  
viewpoint of the *Latin American Society of Pediatric Intensive Care*  
(SLACIP) Sepsis Committee**

13  
14  
15  
16  
17  
18  
19

Jaime Fernández-Sarmiento MD PhD(c)<sup>1,6</sup>, Daniela Carla de Souza MD PhD<sup>2,6</sup>, Roberto Jabornisky MD<sup>3,6</sup>, Gustavo Ariel González MD<sup>4,5,6</sup>, María del Pilar Arias López MD<sup>5,6</sup>, Gladys Palacio MD<sup>5,6</sup>.

20  
21  
22  
23  
24

1 Department of Critical Care Medicine and Pediatrics, Universidad de la Sabana, Fundación Cardioinfantil - Instituto de Cardiología. CES Graduate School. Bogotá Colombia.

25  
26  
27  
28

2 Pediatric Intensive Care Unit and Department of Pediatrics, Hospital Universitario da Universidad de São Paulo and Hospital Sírio Libanês, Sao Paulo, Brazil.

29  
30  
31

3 Department of Pediatrics. Facultad de Medicina. Universidad Nacional del Nordeste. Argentina.

32  
33  
34

4 Pediatric Intensive Care Unit. Hospital Churruca - Visca Medical Complex. Buenos Aires. Argentina.

35  
36  
37  
38

5 Pediatric Intensive Care Unit. Ricardo Gutiérrez Children's Hospital, Buenos Aires, Argentina.

39  
40  
41

6 Sepsis Committee. Latin American Society of Pediatric Intensive Care (SLACIP).

42  
43  
44  
45  
46  
47

Corresponding author: Jaime Fernández-Sarmiento, MD. Universidad de La Sabana, Campus del Puente del Común, Km 7 Autopista Norte de Bogotá, Chía - Cundinamarca - Colombia - South America. JaimeFe@unisabana.edu.co. + 057-16672727 ext 2204.

48  
49

**Word count 3008**

50  
51

**Abstract**

52  
53  
54  
55  
56  
57  
58  
59  
60

*Background:* In this review, we discuss some important aspects of Paediatric Inflammatory Multisystem Syndrome Temporally associated with COVID-19 (PIMS-TS), a new syndrome that is temporally related to previous exposure to severe acute respiratory syndrome coronavirus 2 (SARS-CoV-2) infection. This virus has a broad spectrum of presentation which may overlap with Kawasaki disease (aKD) in terms of

1  
2  
3 presenting symptoms, and laboratory and cardiac findings. Our objective was to review  
4 and summarize published evidence regarding the most important aspects of PIMS-TS,  
5 with special emphasis on the treatment strategies suggested for middle- and low-income  
6 countries.  
7  
8  
9

10  
11  
12 *Methods:* A systematic review of the literature was performed in the principal medical  
13 databases including PUBMED, EMBASE (OVID) and Google Scholar between  
14 December 2019 and August 2020.  
15  
16

17  
18  
19 *Results:* A total of 69 articles were identified in the described databases. Altogether, 13  
20 articles met the inclusion criteria and were eligible. The most frequently described  
21 symptoms of PIMS-TS include fever (82%), shock (67%), and gastrointestinal (87%),  
22 skin (71%) and cardiac disorders (75%). In most series, it has been observed between 4-  
23 6 weeks after the pandemic appears in the general population. Multisystem inflammatory  
24 syndrome in children is presented as a great systemic inflammatory response syndrome  
25 (SIRS), which sometimes presents as shock requiring fluid resuscitation and vasoactive  
26 drug support (26%). Several treatment strategies have been used, including  
27 immunoglobulin, steroids, aspirin, anakinra and anticoagulation, among others. These  
28 general and specific interventions should be guided by an inter- and multi-disciplinary  
29 team, especially in settings with limited resources.  
30  
31  
32  
33  
34  
35  
36  
37

38  
39 *Conclusions:* PIMS-TS COVID-19 is a new type of presentation of SARS-CoV-2  
40 infection, with an exaggerated inflammatory response and frequent *-but not exclusive-*  
41 digestive and myocardial involvement. It is important to describe the clinical course and  
42 outcomes in countries with limited resources as well as establish the role of biomarkers  
43 for early diagnosis, effective therapeutic strategies, and outpatient follow-up schemes.  
44  
45  
46  
47

48  
49 *Key words:* septic shock, COVID-19, inflammation, immunoglobulin, Kawasaki disease,  
50 thrombosis, SARS-CoV-2  
51

### 52 53 **Key messages**

54  
55 -PIMS-TS is a type of presentation of SARS-CoV-2 infection which produces a ten times  
56 greater need for hospitalization and mortality in children than other COVID-19  
57 presentations.  
58  
59  
60

-It is characterized by fever, shock and gastrointestinal, skin and cardiac involvement, with prior positive real-time polymerase chain reaction (RT-PCR) or antibody tests.

-The diagnostic and treatment approach should be aimed at initial stabilization and shock management, especially in countries with limited resources. The specific treatment includes immunomodulators.

### **What does this study add?**

For this SARS-CoV2 disease, which mainly affects children, a comprehensive approach is suggested which may be applied under the various healthcare system access conditions, including strategies geared towards middle- and low-income countries. This treatment includes general stabilization and shock management measures as well as the specific immunomodulatory therapy currently recommended based on the available evidence.

## **INTRODUCTION**

In December 2019, a new viral infection was reported, causing severe respiratory infection and very high mortality. According to its genetic sequencing, this virus belongs to the genus *Beta coronavirus*, closely related to the severe acute respiratory syndrome (SARS) virus. It was named SARS-CoV-2 and its disease COVID-19.<sup>1,2</sup>

Healthcare systems worldwide have been deeply concerned, given SARS-CoV-2's high transmissibility, severity and lethality, particularly in the population over the age of 60.<sup>1</sup> Patients with major comorbidities such as heart disease, diabetes, hypertension, or obesity have an increased risk of dying.<sup>1,2</sup> Moreover, mortality has been associated with multiple organ failure (MOF) as the common final pathway for pneumonia, sepsis, and acute respiratory distress syndrome (ARDS). COVID-19 is usually less severe in paediatric patients. In general, 80-90% of children with SARS-CoV-2 infection are asymptomatic or have a mild infection. However, between 4 -10% of hospitalized children may need to be transferred to a paediatric intensive care unit (PICU), and mortality ranges from 0.1% to 8%.<sup>3,4</sup> Recently, the Critical Coronavirus and Kids Epidemiology (CAKE) study reported a mortality rate of 5% in children hospitalized in critical care in five European and American countries (Chile, Colombia, Italy, Spain and USA), with 76% of cases having severe pneumonia as their main manifestation.<sup>4</sup>

Several pathophysiological factors may explain these features. COVID-19 non-survivors have higher serum ferritin, D-dimer and C-reactive protein (CRP) than those who survive, indicating an intense inflammatory response<sup>2</sup>. Recently, a new type of presentation of

1  
2  
3 SARS-CoV-2 infection has been described in children, involving this significant  
4 inflammatory response. This new disease has been called Paediatric Inflammatory  
5 Multisystem Syndrome Temporally associated with COVID-19 (PIMS-TS), a new  
6 syndrome that is temporally related to previous exposure to severe acute respiratory  
7 syndrome coronavirus 2 (SARS-CoV-2) infection. This is a severe presentation of the  
8 virus in children and requires early detection to avoid its progression and potentially  
9 unsatisfactory outcomes<sup>5</sup>. In this article, we discuss and review the most relevant aspects  
10 of PIMS-TS described to date.  
11  
12  
13  
14  
15  
16  
17  
18

## 19 **METHODS**

### 20 **Search strategy and article selection**

21  
22  
23 A systematic review of the literature was performed in the principal medical databases  
24 including PUBMED, EMBASE (OVID) and Google scholar, using the MeSH terms  
25 (“SARS-CoV-2” OR “Covid-19” OR “coronavirus” OR “infection” OR “sepsis” OR  
26 “covid-19” OR “critical care”) AND “Multisystem Inflammatory Syndrome in Children”  
27 OR “MIS-C” OR “PIMS-TS” between December 2019 and August 2020. The descriptors  
28 were validated in DecS (descriptors in health science) and MeSH (medical subject  
29 headings). Grey literature or as yet unpublished documents were not included.  
30  
31  
32  
33  
34  
35

### 36 **Eligibility criteria**

37  
38 Articles which reported at least five cases of PIMS-TS, including case series, case reports,  
39 and cross-sectional, case-control, cohort (either prospective or retrospective) or clinical  
40 trial studies, were included. Studies of critically ill children with COVID-19 were also  
41 considered, and the cases of PIMS-TS reported in these studies were explored. Other  
42 inclusion criteria were articles which described important outcomes such as mortality,  
43 complications, laboratory findings and treatment received. Only articles in English,  
44 Spanish or Portuguese were considered. No reports of PIMS-TS in low and middle-  
45 income countries were found in indexed journals. The World Health Organization  
46 (WHO), Centers for Disease Control (CDC) and Royal College guidelines were consulted  
47 for the definitions. Articles which did not provide complete data when reporting general  
48 cases of critically ill children with COVID-19, or those for which the full text was not  
49 available, as well as narrative reviews, were excluded. Adult cases have already been  
50 described, but these were not included in this review.  
51  
52  
53  
54  
55  
56  
57  
58  
59  
60

### Study selection and data collection process

First, the inclusion and exclusion criteria for this systematic review were defined, after which one of the researchers (JFS) performed the systematic search of the literature and reviewed the most relevant articles. The established criteria were applied, and the articles were approved by all the SLACIP sepsis committee authors. In case of doubt, or a lack of consensus regarding the inclusion of an article, a second reviewer (RJ) was consulted to decide. Any discrepancies or missing data were resolved by consensus. Preferred Reporting Items for Systematic Reviews and Meta-Analysis (PRISMA) guidelines were followed. (*Figure 1*).

### Patient and Public Involvement statement

No patients participated actively in this review. The data were taken from the most important publications to date on PIMS-TS, including consensus recommendations for high-income countries. It is expected that this information will be disseminated through SLACIP and its various committees for applicability in patients living in middle- and low-income countries.

## RESULTS

### Search and study selection results

A total of 69 articles were identified in the described databases. After eliminating the duplicates and reviews, 13 articles met the inclusion criteria and were eligible. These articles were included in the qualitative synthesis and the most relevant ones which do not include patients reported in other case series are described by their characteristics in *Table 1*.

Although the main pathogenesis of COVID-19 may be similar to other viruses such as influenza, it has shown some clinical presentations which are different from those usually found in those classical respiratory viruses. On April 24, 2020, a new presentation of SARS-CoV-2 in children was described by Riphagen et al. in the United Kingdom.<sup>6</sup> The first report described a cohort of eight children with COVID-19 who required hospitalization in intensive care and had an unusual clinical behavior characterized by a severe hyperinflammatory state, with clinical similarity between all eight patients.<sup>7-9</sup>



1  
2  
3 The Royal College of Paediatrics and Child Health called this new entity PIMS-TS.<sup>10</sup>  
4 Subsequently, the CDC and WHO called it multisystem inflammatory syndrome in  
5 children (MIS-C).<sup>11,12</sup> In general, both terms refer to the same entity and the latter name  
6 has been the most frequently used in the main descriptions of this disease (*Table 2*).  
7  
8

9  
10 The largest series described to date is that of the CDC in Atlanta, with 570 patients. Using  
11 a latent class analysis (LCA) statistical model, it attempted to divide the cases into three  
12 large groups according to their common clinical characteristics.<sup>13</sup> Class I included those  
13 with symptoms which could overlap with macrophage activation syndrome, with a large  
14 inflammatory response. Class II had predominantly respiratory involvement and signs  
15 suggestive of active COVID-19 disease with a high rate of RT-PCR seropositivity (84%).  
16 Class III had clinical manifestations that could overlap with Kawasaki disease, and only  
17 2% were RT-PCR positive.<sup>13</sup>  
18  
19  
20  
21  
22  
23  
24

25 In this regard, most studies report that the patients have a negative RT-PCR and positive  
26 antibody or serology tests. In fact, a negative RT-PCR has been found in 40% of patients  
27 with positive antibody tests. Although RT-PCR is an imperfect test, it is considered the  
28 gold standard today. In the described series, 46% of the cases had a positive serology and  
29 a negative RT-PCR, which suggests that, in these patients, the infection occurred possibly  
30 weeks earlier. An average of 25% of the patients in the included studies had both positive  
31 serology and positive RT-PCR (*supplementary table S1*).  
32  
33  
34  
35  
36  
37  
38  
39  
40

## 41 DISCUSSION

42 PIMS-TS is characterized by a very significant ongoing inflammatory response, in  
43 crescendo, which in fact has been the key element in the Atlanta CDC (May 14<sup>th</sup>) and  
44 WHO (May 15<sup>th</sup>) definitions (*Table 2*).<sup>11,12</sup> Characteristically, these patients present with  
45 high leukocytosis, CRP, procalcitonin (PCT), and serum ferritin.<sup>13</sup> Hoang et al.<sup>14</sup> reported  
46 lower expression of circulating CD16+CD56+ natural killer cells and more profound  
47 lymphopenia in children with PIMS-TS compare to those without PIMS-TS.  
48  
49  
50  
51  
52

53 Primarily, there is an initial innate immune response with the macrophages as the  
54 principal actors. From the pathophysiological point of view, it is striking that more than  
55 90% of children with PIMS-TS have elevated CRP and ferritin. C-reactive protein is an  
56 acute phase reactant that usually rises after six hours of an inflammatory state and is  
57 produced by hepatocytes and adipose tissue in response to IL-1, IL-6 and TNF- $\alpha$   
58  
59  
60

1  
2  
3 stimulation.<sup>15,16</sup> This acute phase reactant from the pentraxin family identifies  
4 phosphatidylserine on the surface of cells that have initiated a programmed cell death  
5 pattern of apoptosis by activating the complement system. This biomarker is very useful  
6 for diagnosis and follow up, especially in middle and low-income countries (given its low  
7 cost), and should be considered on admission with subsequent follow up.

8  
9  
10  
11 Additionally, a marked elevation of ferritin (2-10 times its normal value) has been  
12 observed in more than 90% of the series.<sup>13-17</sup> Ferritin is a protein that stores iron and  
13 releases it in a controlled fashion, but also in pathophysiologic conditions. Its levels can  
14 reflect macrophage response to free hemoglobin as well as DNA viruses, intracellular  
15 bacterial infections and parasites.<sup>18-20</sup> Ferritin can induce positive feedback inflammation,  
16 upregulating toll-like receptor 9 (TLR-9) which leads macrophage inflammasome IL-1  
17 and IL-18 to feed forward ferritin production. TLR-9 may also be stimulated by viral  
18 DNA, other infections and host damage-associated molecular patterns (DAMP).<sup>20</sup> This  
19 whole process generates a large number of inflammasomes and an enhanced  
20 inflammatory pathway, delivering the “cytokine storm.” This precipitate cell death with  
21 a pyroptosis pattern and new DAMPs that stimulate TLR-9.<sup>20</sup> This was described as  
22 “*Hyperferritinemic Syndrome*” by Rosario<sup>21</sup>.

23  
24  
25  
26  
27  
28  
29  
30  
31  
32  
33  
34 Nevertheless, there is evidence of an unusual late adaptive immunity response. It has  
35 come to the researchers attention that PIMS-TS occurred between four and six weeks  
36 after the peak of cases reported as positive for SARS-CoV-2 in each country had been  
37 reached.<sup>13</sup> Pérez-Toledo M et al.<sup>22</sup> recently described eight patients with PIMS-TS with  
38 a negative RT-PCR but with significant elevation of IgG and IgA, and negative IgM.  
39 Additionally, they found elevated IgG1 and IgG3 in these children, which are  
40 immunoglobulin isotypes associated with serum supplement activation. This situation is  
41 consistent with highly elevated CRP related to COVID-19, which activates the  
42 complement system. The elevation of these immunoglobulins suggests that PIMS-TS  
43 occurs due to tissue damage induced by autoantibodies, a situation that has been described  
44 in other types of coronavirus infection.<sup>23-24</sup> We are not aware of any studies in middle  
45 and low-income countries which have described this serological behaviour. Studies are  
46 needed to help clear up this aspect, especially when all the diagnostic test options for  
47 SARS-CoV-2 are not always available. In these countries with limited resources, we  
48 suggest taking an initial RT-PCR. If this is negative and there is a high index of suspicion  
49  
50  
51  
52  
53  
54  
55  
56  
57  
58  
59  
60

1  
2  
3 of PIMS-TS, due to the signs and symptoms, a total antibody or IgM/IgG test should be  
4 performed.<sup>24</sup>  
5  
6  
7

8 For PIMS-TS, most of the series described coagulation disorders. Severe coagulopathy  
9 was seen in 70-80% of the cases (very high D-dimers, prolonged PT, PTT).<sup>13</sup> Like  
10 inflammation, coagulation is necessary for host defense. In addition, proinflammatory  
11 cytokines, monocytes / macrophages, neutrophil activation, and extracellular neutrophil  
12 traps (NETs) can foster local thrombosis. COVID-19 associated coagulopathy (CAC) is  
13 complex and in some ways pathophysiologically different from SIC.<sup>25,26</sup>  
14  
15  
16  
17  
18  
19

20 Cytokine levels of IL-1 $\beta$  and IL-6 are elevated, which induces thrombocytosis and  
21 hyperfibrinogenemia, and the angiotensin-converting enzyme 2 (ACE-2) receptor is  
22 stimulated by SARS-CoV-2, leading to a massive release of plasminogen activators.<sup>27, 28</sup>  
23 D-dimer levels are very high in PIMS-TS, but consumptive coagulopathy is rare in its  
24 early phase.<sup>28</sup> Elevated D-dimer levels can be present in a wide variety of inflammatory  
25 and prothrombotic conditions;<sup>29</sup> in COVID-19, these are probably more associated with  
26 inflammation than thrombosis.<sup>30</sup> Furthermore, serum hyaluronic acid, a key glycocalyx  
27 component, is higher during infancy, progressively diminishing over the years.<sup>19,31</sup> This  
28 could explain a more protected endothelium and a lower probability of a hypercoagulable  
29 state. In addition, CAC has an overlapping pathophysiology with other coagulopathies  
30 like hemophagocytic syndrome (HPS) / hemophagocytic lymphohistiocytosis (HLH),  
31 antiphospholipid syndrome (APS), and thrombotic thrombocytopenic purpura (TTP) /  
32 hemolytic uremic syndrome (HUS), but some unique aspects make it a probably new type  
33 of coagulopathy.<sup>32</sup>  
34  
35  
36  
37  
38  
39  
40  
41  
42  
43  
44  
45  
46  
47  
48  
49  
50  
51  
52  
53  
54  
55  
56  
57  
58  
59  
60

| Author                           | City, Country                                      | Period                                         | Number | Age                                     | Gender     | Comorbidity                                     | Race                                                 | IMC kg/m <sup>2</sup>                                     |
|----------------------------------|----------------------------------------------------|------------------------------------------------|--------|-----------------------------------------|------------|-------------------------------------------------|------------------------------------------------------|-----------------------------------------------------------|
| <b>Whittaker et al [3]</b>       | London, UK                                         | March 23 and May 16                            | 58     | 9 years (IQR 5.7, 14)                   | 43% boys   | 7/58 Comorbidities                              | 69% black or Asian                                   | N/R                                                       |
| <b>Riphagen et al [6]</b>        | London, UK                                         | 10 days in mid-April                           | 8      | 4 – 14 years (range)                    | 5/8 boy    | None                                            | 6/8 Afro-Caribbean                                   | 14 – 33<br>7/8 > 75 <sup>th</sup><br>centile/weight       |
| <b>Verdoni et al [7]</b>         | Bergamo, Italy                                     | Feb 18 and April 20                            | 10     | 7.5 years (SD 3-5)                      | 7/10 boys  | N/R                                             | N/R                                                  | N/R                                                       |
| <b>Belhadjer et al [8]</b>       | France (12 hospitals) and Switzerland (1 hospital) | March 22 to April 30                           | 35     | 10 years (IQR 8.2, 12.4)                | 51% boys   | Comorbidities 28% (asthma 8.55; lupus 3%)       | N/R                                                  | Overweight 17%                                            |
| <b>Golfred-Cato S et al [13]</b> | Multicenter US                                     | March 01 to July 29                            | 570    | 8 (IQR 4,12)                            | 55.4% boys | Comorbidities 8%                                | 40.5% Hispanic and 33.1% Black Non-hispanic          | Obesity 25.6%                                             |
| <b>Cheung et al [33]</b>         | New York, US                                       | April 18 and May 5                             | 17     | 8 years (IQR 1.8, 16)                   | 47% boys   | Most were previously healthy (mild asthma in 3) | White 70%                                            | N/R                                                       |
| <b>Kaushik et al [38]</b>        | New York, US                                       | April 23 to May 23                             | 33     | 10 years (IQR 6, 13)                    | 61% boys   | Comorbidities 48%                               | 45% Hispanic/latino<br>39% black                     | Overweight 12%<br>Obesity (BMI > 30kg/m <sup>2</sup> ) 6% |
| <b>Ramcharan et al [40]</b>      | UK                                                 | 10 <sup>th</sup> April and 9 <sup>th</sup> May | 15     | 8.8 (IQR 6.4, 11.2)<br>93% were over 5y | 73% boys   |                                                 | 100% African/Afr-Caribbean (40%), South Asian, (40%) |                                                           |

|                                 |                 |                     |                                               |                                                          |          |                   |                                          |                                                         |
|---------------------------------|-----------------|---------------------|-----------------------------------------------|----------------------------------------------------------|----------|-------------------|------------------------------------------|---------------------------------------------------------|
|                                 |                 |                     |                                               |                                                          |          |                   | Mixed (13%) Or other minority ethnic     |                                                         |
| <b>Toubiana et al [45]</b>      | France, Paris   | 27 April and 11 May | 21 children with features of Kawasaki disease | 7.9 years (IQR 3.7, 16.6)                                | 43% boys | N/R               | 57% Sub-Saharan Africa/Caribbean islands | 76% had a BMI <b>below</b> the 97 <sup>th</sup> centile |
| <b>Pouletty et al [46]</b>      | Paris, France   | Since April 2020    | 16                                            | 10 (IQR 4.7, 12.5)                                       | 50% boys | Comorbidities 37% | N/R                                      | Overweight 25%                                          |
| <b>Caponi et al [47]</b>        | New York, US    | April 17 – May 13   | 33                                            | 8.6 years (IQR 5.5, 12.6)                                | 61% boys | Comorbidities 21% | 73% non-Hispanic                         | Overweight 6%<br>Obese 39%                              |
| <b>Feldstein L.R et al [48]</b> | Multicenter, US | March 15 to May 20  | 186                                           | 8.3 years (IQR 3.3, 12.5)                                | 62% boys | Comorbidities 27% | 31% Hispanic, 25% Black non hispanic     | Obesity 29%                                             |
| <b>Dufort E et al [49]</b>      | New York City   | March 01 to May 10  | 95                                            | 0-5 years (31%)<br>6-12 years (42%)<br>13-20 years (27%) | 54% boys | Comorbidities 64% | 40% Black<br>36% Hispanic                | Obesity 29%                                             |

Table 1. Demographic characteristics of patients with PIMS-TS. N/R: not reported.

Review Only

### Royal College of Paediatrics and Health Child (RCPCH) Definition [10]

1. A child presenting with persistent fever, inflammation (neutrophilia, elevated CRP and lymphopaenia) and evidence of single or multi-organ dysfunction (shock, cardiac, respiratory, renal, gastrointestinal or neurological disorder) with additional features. This may include children fulfilling full or partial criteria for Kawasaki disease.
2. Exclusion of any other microbial cause, including bacterial sepsis, staphylococcal or streptococcal shock syndromes, infections associated with myocarditis such as enterovirus (waiting for results of these investigations should not delay seeking expert advice).
3. SARS-CoV-2 PCR testing may be positive or negative.

### Centers for Disease Control and Prevention (CDC) Definition [11]

- 1. An individual aged < 21 years presenting with fever<sup>1</sup>, laboratory evidence of inflammation<sup>2</sup> and evidence of clinically severe illness requiring hospitalization, with multisystem (>2) organ involvement (cardiac, renal, respiratory, hematologic, gastrointestinal, dermatologic or neurological); AND**
- 2. No alternative plausible diagnoses; AND**
- 3. Positive for current or recent SARS-CoV-2 infection by RT-PCR, serology or antigen test; or COVID-19 exposure within the 4 weeks prior to the onset of symptoms.**

<sup>1</sup>Fever  $\geq 38.0^{\circ}\text{C}$  for  $\geq 24$  hours, or report of subjective fever lasting  $\geq 24$  hours

<sup>2</sup>Including, but not limited to, one or more of the following: an elevated C-reactive protein (CRP), erythrocyte sedimentation rate (ESR), fibrinogen, procalcitonin, d-dimer, ferritin, lactic acid dehydrogenase (LDH), or interleukin 6 (IL-6), elevated neutrophils, reduced lymphocytes and low albumin.

### World Health Organization Definition [12]

Children and adolescents 0–19 years of age with fever > 3 days

**AND** two of the following:

- a) Rash or bilateral non-purulent conjunctivitis or muco-cutaneous inflammation signs (oral, hands or feet).
- b) Hypotension or shock.
- c) Features of myocardial dysfunction, pericarditis, valvulitis, or coronary abnormalities (including ECHO findings or elevated Troponin/NT-proBNP),
- d) Evidence of coagulopathy (by PT, PTT, elevated d-Dimers).
- e) Acute gastrointestinal problems (diarrhoea, vomiting, or abdominal pain).

**AND**

Elevated markers of inflammation such as ESR, C-reactive protein, or procalcitonin.

**AND**

No other obvious microbial cause of inflammation, including bacterial sepsis, staphylococcal or streptococcal shock syndromes.

**AND**

Evidence of COVID-19 (RT-PCR, antigen test or serology positive), or likely contact with patients with COVID-19.

*Table 2.* RCPCH, CDC, WHO Definitions Criteria for Paediatric Inflammatory Multisystem Syndrome Temporally associated with COVID-19

From a clinical and laboratory perspective, PIMS-TS has usually been seen in previously healthy and frequently obese (30-60% of the series) children over eight years of age (80% of the cases) (*Table 1*). Initially, the group from the United Kingdom (UK) found MIS-C in patients of African descent, but it has been described in patients of all origins.<sup>4,32,33</sup> Persistent high fever for more than three to five consecutive days, maculopapular skin lesions (50-60%) reminiscent of Kawasaki disease (KD) and, frequently, signs of shock at the time of presentation have been the initial clinical characteristics.<sup>33</sup> Digestive symptoms (including nausea, vomiting, diarrhea or abdominal pain) usually present in most cases, as well as myocardial involvement (more than 60% of the series).<sup>14,33</sup> Cardiac involvement is broad and variable, with features including myocardial dysfunction (100% of the initial UK description - 60% in other series), coronary aneurysms, pericarditis, arrhythmias, refractory shock and elevated troponin I or pro-BNP<sup>32-34</sup> (*supplementary table S1*).

### **Guidelines for PIMS-TS management in middle and low-income countries**

With regard to treatment in middle and low-income countries, it is very important to maintain a high index of suspicion. Therefore, in these countries, it is important to use a systematic approach including early recognition and a bundle similar to those recommended for patients with other serious diseases. An expert consensus recently published in the United Kingdom using the Delphi method provides a good summary of the recommended treatments<sup>34</sup>. This approach is recommended for high-income countries. Using the evidence found, we adapted these recommendations, together with

1  
2  
3 those of the SCCM sepsis consensus<sup>16</sup>, for use in middle and low-income countries. We  
4 believe that a comprehensive approach to PIMS-TS patients is necessary, and that taking  
5 these recommendations as a whole could have an impact on the outcomes of PIMS-TS  
6 patients in these countries.  
7  
8  
9

10  
11 From the first presentation to the Emergency Department and / or PICU, two approaches  
12 can be assumed, one general and one specific (*Table 3*):  
13

14  
15 a. *General approach*: A comprehensive approach should be used, similar to that  
16 recommended for patients with sepsis with organ dysfunction or septic shock. In this case,  
17 the contagiousness of SARS-CoV-2 requires the use of personal protective equipment  
18 (PPE) that prevents the spread of the virus, particularly in patients with a positive RT-  
19 PCR.  
20  
21  
22

23  
24 Moreover, the American College of Critical Care Medicine (ACCM) points out the need  
25 to give more attention to Institutional Practice Guidelines (IPGs) based on each facility's  
26 capability.<sup>35</sup> Once IPGs are established, diagnostic and therapeutic measures known as  
27 "patient care bundles" (PCBs) should be developed for a better approach and control of  
28 established processes. The PCBs include three to five evidence-based practices related to  
29 a health care process that should be performed collectively to achieve a synergistic result  
30 that improves care.<sup>36,37</sup>  
31  
32  
33  
34

35  
36 1. Early detection: a comprehensive approach based on a high index of suspicion is  
37 critical. This disease may occur with a wide spectrum of symptoms, so it should be  
38 suspected in all patients with a fever lasting more than three days associated with the  
39 symptoms described in *Table 2*. Contact with a positive case is not always clear.  
40  
41  
42

43 2. Immediate, time-sensitive resuscitation:

44 - Oxygen therapy: This is part of the strategies described in recent sepsis guidelines<sup>16,37</sup>.  
45 High flow nasal cannulas (HFNCs) and non-invasive ventilation (NIV) have been  
46 considered in many reports,<sup>38</sup> especially in patients who have a deteriorated respiratory  
47 pattern with the use of accessory muscles or an SaO<sub>2</sub>/FiO<sub>2</sub> ratio less than 264. Most series  
48 describe respiratory involvement ranging from 20-60% (*supplementary table S1*) and,  
49 generally, if endotracheal intubation is required, it is more highly associated with  
50 cardiovascular involvement. Cases classified as Class II by the CDC may be classified in  
51 these groups.<sup>33,38</sup>  
52  
53  
54

55 - Fluid resuscitation: It is important to consider the recommendations in recently  
56 published guidelines.<sup>16</sup> In healthcare systems where staff and equipment for advanced  
57  
58  
59  
60



1  
2  
3 airway management are available, up to 40–60 mL/kg (10–20 mL/kg per bolus) of  
4 balanced crystalloids (*Ringer's lactate or Plasma-Lyte*) can be given over the first hour,  
5 titrated to clinical markers of cardiac output, and discontinued if signs of fluid overload  
6 develop. In healthcare systems without the availability of intubation, crystalloid boluses  
7 may only be given in cases of hypotension (decompensated shock); in these cases, up to  
8 40 mL/kg of bolus fluid (10–20 mL/kg per bolus) may be infused over the first hour with  
9 titration to clinical markers of cardiac output, and discontinued if signs of fluid overload  
10 develop. If the child is not hypotensive, but has compensated shock, only maintenance  
11 fluids should be started, avoiding bolus fluids which are associated with worse  
12 outcomes<sup>35-38</sup>.

13  
14  
15  
16  
17  
18  
19  
20  
21 -Vasoactive drugs: According to the clinical condition, most series describe the need for  
22 vasoactive drugs in 10 to 60% of the cases with PIMS-TS. Most patients respond to fluid  
23 resuscitation. If necessary, epinephrine or norepinephrine should be considered according  
24 to the patient's condition.<sup>16,39</sup> Inotropes like dopamine, milrinone and levosimendan were  
25 reported to have been used in PIMS-TS.<sup>38-40</sup>

26  
27  
28  
29 -Antibiotic therapy: If bacterial co-infection is suspected, the first dose is recommended  
30 within the first three hours for sepsis associated with organ dysfunction, or within the first  
31 hour for children with septic shock.<sup>39-41</sup>

### 32 33 34 3. Stabilization with adequate monitoring:

35  
36 If possible, advanced hemodynamic monitoring should be instituted. Cardiac  
37 ultrasound/echocardiography or  $S_{cvo2}$  measurements have been suggested by recent  
38 guidelines<sup>16</sup> and patients with PIMS-TS.<sup>42</sup>

39  
40  
41 4. Timely referral or transfer is desirable in this context. In middle and low-income  
42 countries, it is common for patients to be transferred to higher complexity sites. Patients  
43 who are deteriorating or who may need intensive care should be identified. In the PIMS-  
44 TS of the CDC group, 84% of the cases had to be transferred to paediatric intensive care.  
45  
46  
47  
48  
49  
50  
51  
52  
53  
54  
55  
56  
57  
58  
59  
60  
16,40-42

5. Continuous measurement of processes and corrections must be instituted for a  
continuous quality improvement process.<sup>42</sup>

61  
62  
63  
64  
65  
66  
67  
68  
69  
70  
71  
72  
73  
74  
75  
76  
77  
78  
79  
80  
81  
82  
83  
84  
85  
86  
87  
88  
89  
90  
91  
92  
93  
94  
95  
96  
97  
98  
99  
100  
*b. Specific approach:* It is important to emphasize that, in moderate to severe cases, the  
use of immunomodulatory treatment should be considered. Heterogeneous management  
including human immunoglobulin, systemic steroids, anakinra, tocilizumab and aspirin  
<sup>40,42-45</sup> has been reported in the described series (*supplementary table S1*). The American

1  
2  
3 College of Rheumatology (ACR) recommendations for immunomodulatory therapy<sup>42</sup>  
4 have recently been published. We sought to adapt these recommendations to middle and  
5 low-income countries where resources are limited and each intervention must be  
6 streamlined according to need.  
7  
8  
9

- 10 ⇒ IVIG: High doses (2 gr/kg) should be considered for moderate to severe cases,  
11 particularly those with myocardial involvement. Prior to beginning the infusion,  
12 restored heart function must be verified.<sup>42</sup>  
13  
14 ⇒ Steroids: Steroids have recently been shown to be useful in modifying the clinical  
15 course of the disease in adults with severe pneumonia, particularly if they are on  
16 mechanical ventilation.<sup>43-47</sup> In patients with PIMS-TS, low doses could be  
17 considered in all cases (used in 70% of the series – *supplementary table S1*).  
18 Dosing schemes of 1-2 mg/kg/dose of methylprednisolone or its equivalent three  
19 or four times per day have been recommended. The ACR suggests considering  
20 high doses in cases of shock or in those with a high need for vasopressors, and we  
21 believe this recommendation is very important for middle and low-income  
22 countries, especially considering the frequency of late consults with advanced  
23 disease.  
24  
25 ⇒ Anakinra is suggested by the ACR consensus for use in cases of steroid or IVIG-  
26 refractory PIMS-TS.<sup>42</sup> However, in many countries, its use is not approved, or it  
27 is not available, and other biological agents are used. Prospective studies are  
28 needed to evaluate the efficacy and safety of these medications in PIMS-TS.  
29  
30 ⇒ Anticoagulation and antiplatelet treatment: Anticoagulation has become a  
31 fundamental treatment in adults, considering that there is a procoagulant and  
32 hypofibrinolytic state in severe SARS-CoV-2 infection.<sup>42,47-50</sup> In children with  
33 PIMS-TS it is recommended only in cases of documented thrombosis or in  
34 patients with an echocardiogram ejection fraction less than 35%.<sup>43,47</sup> Aspirin  
35 would also be recommended in patients with thrombocytosis (> 450,000 u/L) or  
36 Kawasaki-like disease criteria.<sup>42,47</sup>  
37  
38  
39  
40  
41  
42  
43  
44  
45  
46  
47  
48  
49  
50  
51  
52

53 The prognosis of the disease is usually good, with patient survival greater than 95% in  
54 different published series.<sup>5,6,42-50</sup> A mortality of 1-2% has been described in the published  
55 series, and up to 15% with cardiovascular sequelae, including aneurysms or  
56 dysfunction.<sup>33,48-50</sup> These patients should be followed up after discharge by inter and  
57  
58  
59  
60

multidisciplinary teams including infectious disease, rheumatology and paediatrics. However, there are incomplete data from all the cases, along with a knowledge gap regarding mild and moderate cases, the natural course and the clinical behavior of the disease.<sup>8,47-50</sup>

### A. General approach

1. Early detection
2. Immediate, time-sensitive resuscitation
  - a. Oxygen therapy
  - b. Fluid resuscitation
  - c. Vasoactive drugs
  - d. Antibiotic therapy: if bacterial co-infection is suspected
3. Stabilization with adequate monitoring.
4. Timely referral or transfer according to the context and available resources.
5. Continuous measurement of processes.

### B. Specific approach

1. Human immunoglobulin: 2 gr/kg for moderate to severe cases
2. Steroids:
  - ⇒ 1-2 mg/kg/dose of methylprednisolone three or four times per day
  - ⇒ High doses in cases of shock with high vasopressor requirement
3. Anakinra:
  - ⇒ Only in cases refractory to steroids and IVIG. Not available in all countries.
4. Anticoagulation is recommended for:
  - a. Documented thrombosis
  - b. Echocardiogram with an EF of less than 35%
5. Antiplatelet treatment: recommended for thrombocytosis > 450,000 u/L

Table 3. Summary of recommendations for management of PIMT-TS in countries with limited resources.

### Conclusion

PIMS-TS is a new type of presentation of SARS-CoV-2 infection, with an exaggerated inflammatory response and inadequate inflammatory resolution with frequent *-but not*

1  
2  
3 *exclusive-* digestive and myocardial involvement. It should be considered as a new  
4 disease with unique symptoms, a greater variety of clinical courses, and possibly different  
5 physiological mechanisms. In middle and low-income countries, studies should be  
6 performed to learn more about this disease in these regions and determine if they have  
7 different phenotypic behaviors. In addition, the real role of some inflammatory  
8 biomarkers and cost-effective therapeutic strategies should be determined.  
9  
10  
11  
12  
13  
14

### 15 **Contributors**

16 JFS, DS, RJ, PA, GG, GP conceptualized and designed the literature search. JFS, DS, RJ  
17 initiated the search and a first draft. All authors contributed to subsequent drafts. JFS, as  
18 group leader, supervised and moderated the search, initial drafts, the overall collation of  
19 the figures and tables and final manuscript. All authors approved the final manuscript as  
20 submitted and agree to be accountable for all aspects of the work  
21  
22  
23  
24  
25  
26

27 **Funding** The authors have not declared a specific grant for this research from any funding  
28 agency in the public, commercial or not-for-profit sectors.  
29  
30  
31

32 **Competing interests** No, there are no competing interests.  
33  
34  
35

36 **Patient consent for publication** Not required.  
37  
38  
39

40 **Provenance and peer review:** Not commissioned; externally peer reviewed. Data  
41 availability statement  
42  
43  
44

45 **Data are available statement:** no data are available.  
46  
47  
48

49 **Open access** This is an open access article distributed in accordance with the Creative  
50 Commons Attribution Non Commercial (CC BY-NC 4.0) license, which permits others  
51 to distribute, remix, adapt, build upon this work non-commercially, and license their  
52 derivative works on different terms, provided the original work is properly cited,  
53 appropriate credit is given, any changes made indicated, and the use is non-commercial.  
54 See: <http://creativecommons.org/licenses/by-nc/4.0/>.  
55  
56  
57  
58  
59

60 **ORCID:** iD Jaime Fernández-Sarmiento <http://orcid.org/0000-0003-2874-2949116>

## REFERENCES

1. World Health Organization. Coronavirus disease 2019 (COVID-19): situation report. Available in: <http://www.who.int/docs/default-source/coronaviruse/situation-reports.2>. 28 Jun 2020.
2. Yang X, Yu Y, Xu J et al. Clinical course and outcomes of critically ill patients with SARS-CoV-2 pneumonia in Wuhan, China: a single-centered, retrospective, observational study. *Lancet Respir Med*. 2020. Epub 2020/02/28. doi: 10.1016/S2213-2600(20)30079-5.
3. Whittaker E, Bamford A, Kenny J et al. Clinical Characteristics of 58 Children with a Pediatric Inflammatory Multisystem Syndrome Temporally Associated with SARS-CoV2-2. *JAMA* 2020 Jun8; e2010369. Doi:10.1001/jama.2020.10369.
4. González-Damrauskas S, Vásquez-Hoyos P, Camporesi A, et al. Pediatric critical care and COVID19. *Pediatrics*. 2020; doi: 10.1542/peds.2020-1766.
5. De Biasi RL, Song X, Delaney M, et al. Severe COVID-19 in children and young adults in the Washington, DC Metropolitan Region. *J Pediatr* 2020. <https://doi.org/10.1016/j.jpeds.2020.05.007>. In press.
6. Riphagen S, Gomez X, Gonzalez-Martinez et al. Hyperinflammatory shock in children during COVID-19 pandemic. *Lancet* 2020 May 7. [https://doi.org/10.1016/S0140-6736\(20\)31094-1](https://doi.org/10.1016/S0140-6736(20)31094-1). S0140-6736(20)31094- 1, ahead of print.
7. Verdoni L, Mazza A, Gervasoni A, et al. An outbreak of severe Kawasaki-like disease at the Italian epicenter of the SARS-CoV-2 epidemic: an observational cohort study. *Lancet* 2020. [https://doi.org/10.1016/S0140-6736\(20\)31103-X](https://doi.org/10.1016/S0140-6736(20)31103-X). ahead of print.
8. Belhadjer Z, Meot M, Bajolle F, et al. Acute heart failure in multisystem inflammatory syndrome in children (MIS-C) in the context of global SARS-CoV-2. pandemic. *Circulation* 2020 May 17. <https://doi.org/10.1161/CIRCULATIONAHA.120.048360>. ahead of print.
9. Grimaud M, Starck J, Levy M et al. Acute myocarditis and multisystem inflammatory emerging disease following SARS-CoV-2 infection in critically ill children. *Ann Intensive Care* 2020; 10:69.
10. Royal College of Paediatrics and Child Health. Available in: <https://www.rcpch.ac.uk/resources/guidance-paediatric-multisystem-inflammatory-syndrome-temporally-associated-covid-19-pims>.

11. CDC. Multisystem Inflammatory Syndrome in Children (MIS-C) associated with coronavirus disease 2019 (COVID-19). <https://emergency.cdc.gov/han/2020/han00432.asp>.
12. WHO. Multisystem inflammatory syndrome in children and adolescents with COVID-19 Scientific brief. Available en: <https://www.who.int/publications-detail/multisystem-inflammatory-syndrome-in-children-and-adolescents-with-covid-19>. 15 May 2020.
13. Golfred-Cato S, Bryant B, Leung J et al. COVID-19- Associated Multiystem Inflammatory syndrome in Children- United States, March-July 2020. Available in <https://www.cdc.gov/mmwr/volumes/69/wr/pdfs/mm6932e2-H.pdf>.
14. Hoang A, Chroath K, Moreira A et al., COVID-19 in 7780 pediatric patients: A systematic review, *E-Clinical Medicine* (2020), <https://doi.org/10.1016/j.eclinm.2020.100433>.
15. Tan L, Wang Q, Zhang D, et al. Lymphopenia predicts disease severity of COVID-19: a descriptive and predictive study. *Signal Transduct Target Ther.* 2020;5(1):33. Published 2020 Mar 27. doi:10.1038/s41392-020-0148-4.
16. Weiss SL, Peters MJ, Alhazzani W, et al. Surviving sepsis campaign international guidelines for the management of septic shock and sepsis-associated organ dysfunction in children. *Intensive Care Med* 2020;46 (Suppl. 1):10–67.
17. Alhazzani W, Moller MH, Arabi YM, et al. Surviving sepsis campaign: guidelines on the management of critically ill adults with Coronavirus Disease 2019 (COVID-19). *Intensive Care Med* 2020;46(5):854–87.
18. Jaume M, Yip MS, Cheung CY et al. Anti-severe acute respiratory syndrome coronavirus spike antibodies trigger infection of human immune cells via a pH- and cysteine protease-independent Fc. R pathway. *Journal of virology.* 2011;85(20):10582-97. 12.
19. Fernández-Sarmiento J, Salazar LM, Carcillo J. The endothelial glycocalyx: a fundamental determinant of vascular permeability in sepsis. *Ped Crit Care* 2020;21e:e291-e300.
20. Carcillo JA, Kernan KK, Horvat CM et al. Why and How Is Hyperferritinemic Sepsis Different from Sepsis Without Hyperferritinemia? *Pediatr Crit Care Med.* 2020;21(5):509-512. doi:10.1097/PCC.0000000000002285.
21. Rosário C, Zandman-Goddard G, Meyron-Holtz EG, et al: The Hyperferritinemic syndrome: Macrophage activation syndrome, Still's disease, septic shock and catastrophic antiphospholipid syndrome. *BMC Med* 2013; 11:185.

- 1  
2  
3 22. Pérez-Toledo M, Faustini S, Jossi S et al. Serology confirms SARS-CoV-2 infection  
4 in PCR-negative children presenting with Pediatric Inflammatory Multi-system  
5 syndrome. Institute of Immunology and Immunotherapy, University of Birmingham UK.  
6 Doi: <https://doi.org/10.1101/2020.06.05.20123117>. Online 07 June 2020.  
7  
8  
9  
10 23. Kam YW, Kien F, Roberts A. et al. Antibodies against trimeric S glycoprotein protect  
11 hamsters against SARS-CoV challenge despite their capacity to mediate FcγRII-  
12 dependent entry into B cells in vitro. *Vaccine*. 2007;25(4):729-40.  
13  
14 24. Wang SF, Tseng SP, Yen CH et al. Antibody-dependent SARS coronavirus infection  
15 is mediated by antibodies against spike proteins. *Biochemical and biophysical research*  
16 *communications*. 2014;451(2):208-14.  
17  
18 25. Iba T, Levy JH, Connors JM et al. The unique characteristics of COVID-19  
19 coagulopathy. *Crit Care*. 2020;24(1):360. Published 2020 Jun 18. doi:10.1186/s13054-  
20 020-03077-0.  
21  
22 26. Iba T, Levy JH. Sepsis-induced coagulopathy and disseminated intravascular  
23 coagulation. *Anesthesiology*. 2020;132(5):1238–45.  
24  
25 27. Waltuch T, Gill P, Zinns LE et al. Features of COVID-19 post-infectious cytokine  
26 release syndrome in children presenting to the emergency department [published online  
27 ahead of print, 2020 May 8. *Am J Emerg Med*. 2020; S0735- 6757(20)30403-4.  
28 doi:10.1016/j.ajem.2020.05.058.  
29  
30 28. Varga Z, Flammer AJ, Steiger P, et al. Endothelial cell infection and endothelitis in  
31 COVID-19. *Lancet*. 2020;395(10234):1417–8.  
32  
33 29. Yu B, Li X, Chen J, et al. Evaluation of variation in D-dimer levels among COVID-  
34 19 and bacterial pneumonia: a retrospective analysis [published online ahead of print,  
35 2020 Jun 10]. *J Thromb Thrombolysis*. 2020;1-10. doi:10.1007/s11239-020-02171-y.  
36  
37 30. Bates SM. D-dimer assays in diagnosis and management of thrombotic and bleeding  
38 disorders. *Semin Thromb Hemost*. 2012;38(7):673-682. doi:10.1055/s-0032-1326782  
39  
40 31. Trivedi P, Cheeseman P, Mowat AP. Serum hyaluronic acid in healthy infants and  
41 children and its value as a marker of progressive hepatobiliary disease starting in infancy.  
42 *Clin Chim Acta*. 1993;215(1):29-39. doi:10.1016/0009-8981(93)90246-z.  
43  
44 32. Tan W, Aboulhosn J. The cardiovascular burden of coronavirus disease 2019  
45 (COVID-19) with a focus on congenital heart disease. *Int J Cardiol*. 2020;309; 7077. doi:  
46 10.1016/j.ijcard.2020.03.063.  
47  
48  
49  
50  
51  
52  
53  
54  
55  
56  
57  
58  
59  
60

- 1  
2  
3 33. Cheung E, Zachariah P, Gorelik M et al. Multisystem Inflammatory Syndrome  
4 Related to COVID-19 in Previously Healthy Children and Adolescents in New York City.  
5 JAMA. Published online June 8, 2020. Doi:10.1001/jama.2020.10374  
6  
7  
8 34. Harwood R, Allin B, Jones C et al. A national consensus management pathway for  
9 paediatric inflammatory multisystem syndrome temporally associated with COVID-19  
10 (PIMS-TS): results of a national Delphi process. *Lancet Child Adolesc Health*. 2020  
11 Published Online September 18 doi.org/10.1016/S352-4642(20)30304-7  
12  
13 35. Davis AL, Carcillo JA, Aneja RK, et al. American College of Critical Care Medicine  
14 Clinical Practice Parameters for Hemodynamic Support of Pediatric and Neonatal Septic  
15 Shock. *Crit Care Med*. 2017; 45(6):1061-93.  
16  
17 36. Wip C, Napolitano L. Bundles to prevent ventilator-associated pneumonia: how  
18 valuable are they? *Curr Opin Infect Dis*. 2009; 22(2):159-66.  
19  
20 37. Kohn Loncarica G, Fustiñana A, Jabornisky R. Recommendations for the  
21 management of pediatric septic shock in the first hour (part I). *Arch Argent Pediatr*  
22 2019;117(1): e14-e23.  
23  
24 38. Kaushik S, Aydin SI, Derespina KR, et al. Multisystem Inflammatory Syndrome in  
25 Children (MIS-C) Associated with SARS-CoV-2 Infection: A Multi-institutional Study  
26 from New York City [published online ahead of print, 2020 Jun 14]. *J Pediatr*.  
27 2020;S0022-3476(20)30747-239.  
28  
29 39. National Institute for Health and Care Excellence. Sepsis: Recognition, Diagnosis and  
30 Early Management. London, 2016;51. [Accessed on: June 27th, 2020]. Available at:  
31 [https://www.nice.org.uk/guidance/ng51/resources/sepsis-recognition-diagnosis-and-](https://www.nice.org.uk/guidance/ng51/resources/sepsis-recognition-diagnosis-and-early-manage-ment-pdf-1837508256709)  
32 [early-manage-ment-pdf-1837508256709](https://www.nice.org.uk/guidance/ng51/resources/sepsis-recognition-diagnosis-and-early-manage-ment-pdf-1837508256709).  
33  
34 40. Ramcharan, T, Nolan, O, Lai C.Y. et al. Paediatric Inflammatory Multisystem  
35 Syndrome: Temporally Associated with SARS-CoV-2 (PIMS-TS): Cardiac Features,  
36 Management and Short-Term Outcomes at a UK Tertiary Paediatric Hospital. *Pediatr*  
37 *Cardiol* (2020). <https://doi.org/10.1007/s00246-020-02391-2>.  
38  
39 41. Fernández-Sarmiento J, Carcillo JA, Salinas CM, et al. Effect of a sepsis educational  
40 intervention on hospital stay. *Pediatr Crit Care Med*. 2018;19: e321–e328.  
41  
42 42. American College of Rheumatology. Clinical Guidance for Pediatric Patients with  
43 multisystem inflammatory syndrome in children (MIS-C) associated with SARS-CoV-2  
44 and hyperinflammation in covid-19. Available in  
45 <https://www.rheumatology.org/announcements#PediatricClinicalGuidance>. Jun3 17  
46  
47  
48  
49  
50  
51  
52  
53  
54  
55  
56  
57  
58  
59  
60



- 1  
2  
3 43. Low-cost dexamethasone reduces death by up to one third in hospitalized patients  
4 with severe respiratory complications of COVID-19 [Internet]. RECOVERY  
5 (Randomised Evaluation of COVID-19 Therapy) University of Oxford. 2020 [cited 2020  
6 Jun 18]. Available from: [https://www.recoverytrial.net/news/low-cost-dexamethasone-](https://www.recoverytrial.net/news/low-cost-dexamethasone-reduces-death-by-up-to-one-third-in-hospitalised-patients-with-severe-respiratory-complications-of-covid-19)  
7 [reduces-death-by-up-to-one-third-in-hospitalised-patients-with-severe-respiratory-](https://www.recoverytrial.net/news/low-cost-dexamethasone-reduces-death-by-up-to-one-third-in-hospitalised-patients-with-severe-respiratory-complications-of-covid-19)  
8 [complications-of-covid-19](https://www.recoverytrial.net/news/low-cost-dexamethasone-reduces-death-by-up-to-one-third-in-hospitalised-patients-with-severe-respiratory-complications-of-covid-19).  
9  
10  
11  
12  
13 44. Rajasekaran S, Kruse K, Kovey K, et al. Therapeutic role of anakinra, an interleukin-1  
14 receptor antagonist, in the management of secondary hemophagocytic  
15 lymphohistiocytosis/ sepsis/multiple organ dysfunction/macrophage activating syndrome  
16 in critically ill children. *Pediatr Crit Care Med* 2014;15(5):401–8.  
17  
18  
19  
20 45. Toubiana J, Poiralut C, Corsia A et al. Kawasaki-like multisystem inflammatory  
21 syndrome in children during the covid-19 pandemic in Paris, France: prospective  
22 observational study. *BMJ* 2020;369m2094.  
23  
24  
25 46. Pouletty M, Borocco C, Ouldali N et al. Paediatric multisystem inflammatory  
26 syndrome temporally associated with SARS-CoV-2 mimicking Kawasaki disease (Kawa-  
27 COVID-19): a multicentre cohort. *Ann Rheum Dis* 2020; 0:1-8.  
28  
29  
30 47. Capone CA, Subramony A, Sweberg T et al. Characteristics, Cardiac involvement,  
31 and Outcomes of Multisystem Inflammatory Disease of Childhood (MIS-C) Associated  
32 with SARS-CoV-2 Infection, *The Journal of Pediatrics* (2020), doi:  
33 <https://doi.org/10.1016/j.jpeds.2020.06.044>.  
34  
35  
36  
37 48. Feldstein L.R, Rose E.B, Horwitz J.P et al. Multisystem Inflammatory Syndrome in  
38 U.S. Children and Adolescents. *N Engl J Med* 2020 June 29.  
39 Doi:10.1056/NEJMoa2021680.  
40  
41  
42  
43 49. Dufort E, Koumnas E, Chow E et al. Multisystem Inflammatory Syndrome in  
44 Children in New York State. *N Engl J Med* 2020 Jun 29. Doi:10.1056/NEJMoa2021756  
45  
46  
47 50. Prata-Barbosa A, Lima-Setta F, Rodrigues dos Santos G et al. Pediatric patients with  
48 COVID-19 admitted to intensive care units in Brazil: a prospective multicenter study.  
49 *Jornal de Pediatria*. 2020;96(5):582-592.  
50  
51  
52  
53  
54  
55  
56  
57  
58  
59  
60

1  
2  
3  
4  
5  
6  
7  
8  
9  
10  
11  
12  
13  
14  
15  
16  
17  
18  
19  
20  
21  
22  
23  
24  
25  
26  
27  
28  
29  
30  
31  
32  
33  
34  
35  
36  
37  
38  
39  
40  
41  
42  
43  
44  
45  
46  
47  
48  
49  
50  
51  
52  
53  
54  
55  
56  
57  
58  
59  
60

*Figure 1.* Selection process. We followed the PRISMA guidelines for reporting in systematic reviews and meta-analyses

*Table 1.* Demographic characteristics of patients with PIMS-TS

*Table 2.* RCPCH, CDC and WHO Definition Criteria for Paediatric Inflammatory Multisystem Syndrome Temporally associated with COVID-19

*Table 3.* Summary of recommendations for management of PIMT-TS in countries with limited resources.

*Supplementary table S1.* Clinical and echocardiographic findings, and treatments instituted in the described series of PIMS-TS patients.

1  
2  
3  
4  
5  
6  
7  
8  
9  
10  
11  
12  
13  
14  
15  
16  
17  
18  
19  
20  
21  
22  
23  
24  
25  
26  
27  
28  
29  
30  
31  
32  
33  
34  
35  
36  
37  
38  
39  
40  
41  
42  
43  
44  
45  
46  
47  
48  
49  
50  
51  
52  
53  
54  
55  
56  
57  
58  
59  
60



215x279mm (200 x 200 DPI)

| Author                     | Clinical presentation                                                                                                                                                                                                                                                                         | ECHO                                                                                                                                                                          | SARS-CoV-2 test                                                                                                           | Organ support                                                                                                               | Treatment                                                                                                   | Outcome / Died                                        |
|----------------------------|-----------------------------------------------------------------------------------------------------------------------------------------------------------------------------------------------------------------------------------------------------------------------------------------------|-------------------------------------------------------------------------------------------------------------------------------------------------------------------------------|---------------------------------------------------------------------------------------------------------------------------|-----------------------------------------------------------------------------------------------------------------------------|-------------------------------------------------------------------------------------------------------------|-------------------------------------------------------|
| <b>Whittaker et al [3]</b> | Fever 100%, Headache 26% Vomiting 45% Diarrhea 52%, Abdominal pain 53%, Rash 52% Conjunctivitis 45% Lymphadenopathy 16% Mucus membrane, changes/red cracked lips 29% Swollen hands and feet 16%, Respiratory symptoms 21%.<br><b>Fever + elevated inflammatory markers – 40%, Shock - 50%</b> | Left ventricular dysfunction 62% (18/29)<br>Abnormally dilated coronary arteries (z score >2) 8/55<br>Giant coronary artery aneurysms 2<br>Coronary artery aneurism 14% (n=8) | RT-PCR SARS-CoV-2 + 26%<br>IgG antibody SARS-CoV-2 + 87%<br><br>78% had evidence of current or prior SARS-CoV-2 infection | PICU 50%<br>Acute kidney injury 22%<br>Shock + inotropic support 47%<br>MV 43%<br>ECMO 5%                                   | Inotropic support 47%<br>IVIG 71%<br>Corticosteroids 64%<br>Anakinra 5%<br>Infliximab 14%                   | Death 2%                                              |
| <b>Riphagen et al [6]</b>  | Fever 8/8<br>Diarrhoea 7/8<br>Abdominal pain 6/8<br>Vomiting 4/8<br>Conjunctivitis 5/8<br>Rash 4/8<br>Vasoplegic shock 8/8                                                                                                                                                                    | 7/8 ventricular dysfunction<br>Echobright coronary vessels<br>1/8 giant coronary aneurysm                                                                                     | SARS-CoV-2 negative 5/8<br>SARS-CoV-2 positive 2/8<br>Family exposure 4/8                                                 | Inotropic/vasopressor support 8/8, MV 5/8, HFNC 1/8, NIV 3/8, RRT 1/8, VA-ECMO 1/8 (arrhythmia with refractory shock, died) | IVIG 8/8, Corticoids 5/8<br>Aspirin 3/8, Heparin 1/8, Antibiotics 8/8, Infliximab 1/8                       | 1 died<br>6/8 alive<br>PICU length of stay 3 – 7 days |
| <b>Verdoni et al [7]</b>   | Classic form of Kawasaki 50%, Incomplete form of Kawasaki disease 50%<br>Kdss and MAS 50%<br>Diarrhoea 60%<br>Meningeal signs 40%<br>Drowsiness 10%                                                                                                                                           | <b>Anormal ECHO 60%</b><br><b>Aneurism 10%</b><br><b>FEVE &lt; 50% – 50%</b><br>Mitral valve regurgitation 10%<br>Pericardial effusion 40%                                    | RT-PCR SARS-CoV-2 + 20%<br>Serology for SARS-CoV-2 antibodies – 80% were IgG +, and 3 were also IgM +                     |                                                                                                                             | Inotropic support 20%<br>Adjunctive steroid treatment 80%<br>IVIG 100%<br>Aspirin 20%                       | None                                                  |
| <b>Belhadjer et al [8]</b> | Asthenia 100%<br>Fever 100%<br>GI symptoms 83% (2 children underwent emergency operation for suspected appendicitis)<br>Respiratory distress 65%                                                                                                                                              | Coronary artery dilatation (z score > 2) 17%<br>Aneurysm 0<br>LVEF < 30% - 28%<br>LVEF 30-50% - 72%                                                                           | SARS-CoV-2 was confirmed 88.5%<br>RT-PCR-SARS-CoV-2 + 34%<br>Fecal PCR 6%<br>Antibodies + 86%                             | Respiratory support 94% (IMV 62%; NIV 32%)<br>VA-ECMO 28%                                                                   | Inotropic support 80%<br>IVIG 71%<br>Corticosteroids 34%<br>Anakinra 8%<br>Anticoagulation with heparin 65% | None                                                  |

|                                  |                                                                                                                                                                                                                                                         |                                                                                                                            |                                                                                                                                                    |                                                                                                   |                                                                                                                   |                                             |
|----------------------------------|---------------------------------------------------------------------------------------------------------------------------------------------------------------------------------------------------------------------------------------------------------|----------------------------------------------------------------------------------------------------------------------------|----------------------------------------------------------------------------------------------------------------------------------------------------|---------------------------------------------------------------------------------------------------|-------------------------------------------------------------------------------------------------------------------|---------------------------------------------|
|                                  | Rhinorrhea 43%<br>Adenopathy 60%<br>Rash 57%<br>Meningism 31%<br>At admission to the ICU,<br>80% were in cardiogenic<br>shock                                                                                                                           |                                                                                                                            |                                                                                                                                                    |                                                                                                   |                                                                                                                   |                                             |
| <b>Grimaud et al [9]</b>         | Fever 100%, Abdominal pain 100%, Rash 50%, Conjunctivitis 30%, Adenitis 20%, Tachycardia 100% Hypotension 100% (75% clinical signs of vasoplegia)                                                                                                       | LVEF 35% (IQR 25-55)                                                                                                       | SARS-CoV-nasopharyngeal swabs + 50% SARS-CoV-2 antibodies + 100% (15/15), <b>95% had identified SARS-CoV-2 infection on PCR and/or by serology</b> | NIV 55%,IMV 40%, HFNO 5%,Respiratory support in all patient was indicated for hemodynamic support | IVIg100%,Corticosteroids 10%, Anakinra 5%, Tocilizumab 5%, Inotropic/vasopressor support 95%                      | None                                        |
| <b>Cheung et al [33]</b>         | Fever 100% GI symptoms 88% Shock at presentation 76% Rash 71%, Conjunctivitis 65% Lip redness/swelling 65% Neurologic symptoms 47%, Respiratory symptoms 41%, Myalgia 35%, Lymphadenopathy 35%, Hypoxia 18% Criteria for KD 47% Incomplete Kawasaki 29% | FEVE mildly decreased 29% FEVE mild-moderately decreased 24% FEVE moderate-severely decreased 12% Pericardial effusion 47% | RT-PCR SARS-CoV-2 + 47% Serology for SARS-CoV-2 antibodies → 53%                                                                                   | PICU 88%                                                                                          | IVIg 76% Methylprednisolone 71% Hydrocortisone 21% Enoxaparin prophylaxis 59% Enoxaparin treatment 6% Aspirin 24% | None                                        |
| <b>Golfred-Cato S et al [13]</b> | Fever 100% Bilateral conjunctival injection 48.4% Oral mucose changes 23% Rash 55.3%                                                                                                                                                                    | Abnormal ECHO with coronary-artery aneurysms 18.6%                                                                         | RT-PCR 25.8% Serology positive 46.1% RT-PCR and serology positive 27.2%                                                                            | PICU 63.9% MV 13.1% Vasoactives 44.9%                                                             | IVIg 80.5% Steroids 62.8% Antiplatelet medication 58.6% Anticoagulation 44.2%                                     | Died 1.8% Organs systems involved 4-5 61.6% |
| <b>Kaushik et al [38]</b>        | Fever 93%, Abdominal pain 63%, Nausea/emesis 69%, Diarrhea 48%                                                                                                                                                                                          | Pericardial effusion 46%                                                                                                   | SARS-CoV-2 antibody + 81%                                                                                                                          | NIV 36% IMV 15% ECMO 3%                                                                           | IVIg 54%, Corticosteroids 51%, Tocilizumab 36%                                                                    | Death 3%                                    |

|                             |                                                                                                                                                                                                                                                                                                                                                                                         |                                                                                                                                                                                                                                                                     |                                                                                                                                                                                                                                                                            |                                                              |                                                                                                                                                                                                                   |      |
|-----------------------------|-----------------------------------------------------------------------------------------------------------------------------------------------------------------------------------------------------------------------------------------------------------------------------------------------------------------------------------------------------------------------------------------|---------------------------------------------------------------------------------------------------------------------------------------------------------------------------------------------------------------------------------------------------------------------|----------------------------------------------------------------------------------------------------------------------------------------------------------------------------------------------------------------------------------------------------------------------------|--------------------------------------------------------------|-------------------------------------------------------------------------------------------------------------------------------------------------------------------------------------------------------------------|------|
|                             | Hypotension 63%,<br>Mucocutaneous,<br>involvement 21%<br>Conjunctivitis 36%<br>Rash 42%, Shortness of<br>breath 33%<br>Neurologic involvement<br>12%                                                                                                                                                                                                                                    | LVEF median 46.6<br>(IQR 39.5, 52.8)<br>LVEF < 30%: 12%<br>LVEF 30-50%: 53%<br>Recovered LV function<br>prior to dischargr 95%                                                                                                                                      | RT-PCR SARS-CoV-2<br>+ 33%<br>18% tested + for both                                                                                                                                                                                                                        | Intra-aortic ballon<br>pump support 3%                       | Remdesivir 21%, Anakinra<br>12%, Convalescent plasma<br>therapy 3%, Aspirin 24%<br>Anticoagulation, prophylaxis<br>15%, Anticoagulation,<br>therapeutic 81% Antibiotics<br>> 48h 45%<br>Vasopressor/inotropes 51% |      |
| <b>Ramcharan et al [40]</b> | Fever 100%<br>GI symptoms 87%<br>Incomplete KD 53%                                                                                                                                                                                                                                                                                                                                      | 93% coronary artery<br>abnormalities<br>LVEF median on<br>admission 51%                                                                                                                                                                                             | 13% described typical<br>COVID-19 symptoms<br>in the previous two<br>months<br>20% related contacted<br>with family member<br>with COVID-19                                                                                                                                | Respiratory support<br>53%<br>Inotrope or vasopressor<br>67% | IVIG 67% (10/15), of whom<br>2 received a second dose<br>Metylprednisolone 33%<br>73% werw discharged on<br>low dose aspirin<br>Antibiotic 100%                                                                   | None |
| <b>Toubiana et al [45]</b>  | Recent history of viral-<br>like symptoms was report<br>in 43%<br>Median duration between<br>these symptoms and the<br>onset of signs and<br>symptoms of Kawasaki<br>disease was 45 days.<br>Complete presentation of<br>KD 52%, Abdominal<br>symptoms 95%, Lips and<br>oral cavity changes 76%<br>Conjunctivitis 81%<br>Rash 76%, Changes to<br>extremities 48%<br>Lymphadenopathy 57% | Myocarditis 76%<br>(LVFE range between<br>10 and 57%)<br>38% coronary artery<br>abnormalities: 24%<br>which consisted of<br>dilations (z score<br>between 2.0 and 2.5);<br>14% with increased<br>coronary visibility<br>No coronary<br>aneurysms were<br>identified | History of recent<br>contact with people<br>with viral-like<br>symptoms was + in<br>48%<br>Median interval<br>between reported<br>contact and KD was 36<br>days<br>RT-PCR-SARS-CoV-2<br>+ 38%<br>IgG antibodies SARS-<br>CoV-2 + 90%<br>9,5% negative<br>Serology and PCR) | PICU 81%<br>Vasoactive agents 71%<br>MV 52%                  | IVIG 100% (24% needed a<br>second dose)<br>Low dose aspirin (3-<br>5mg/kg/day) 100%<br>Corticosteroids (2-<br>10mg/kg/day) 48%<br>Antibiotic 86%                                                                  | None |
| <b>Pouletty et al [46]</b>  | Fever 100%<br>Respiratory signs 12%<br>GI signs 81%<br>Anosmia 6%                                                                                                                                                                                                                                                                                                                       | Abnormal ECHO 69%<br>Coronary dilatation<br>19% (median z score<br>2.6)                                                                                                                                                                                             | Family c/s COVID-19<br>infection 75%<br>First infectious<br>exposure-                                                                                                                                                                                                      |                                                              | IVIG 93%<br>(Second infusion 335)<br>Steroids 25%<br>Anakinra 6%                                                                                                                                                  | None |

|                                 |                                                                                                                                                                                                         |                                                                                                                                             |                                                                                                                                                               |                                                                      |                                                                                                                                                           |                                                                                                                  |
|---------------------------------|---------------------------------------------------------------------------------------------------------------------------------------------------------------------------------------------------------|---------------------------------------------------------------------------------------------------------------------------------------------|---------------------------------------------------------------------------------------------------------------------------------------------------------------|----------------------------------------------------------------------|-----------------------------------------------------------------------------------------------------------------------------------------------------------|------------------------------------------------------------------------------------------------------------------|
|                                 | Neurological signs 56%<br>Rash 81%<br>Conjunctivitis 94%<br>Hands and feet edema/erythema 68%<br>Dry cracked lips 87%<br>Lymphadenopathy 37%<br>Haemodynamic failure 69%<br>Complete KD 62%<br>KDSS 44% | No aneurysm<br>Myocarditis 44% (median LVEF 35%)<br>Pericarditis 25%                                                                        | hospitalization 21 days (IQR 21-24)<br>RT-PCR-SARS-CoV-2 all sites + 69%<br>Serology IgG + 87%                                                                |                                                                      | Tocilizumab 6%<br>AAS (30-50mg/kg) 52%<br>AAS anti-aggregant dose 50%                                                                                     |                                                                                                                  |
| <b>Caponi et al [47]</b>        | Fever 100%<br>GI symptoms 97%<br>Neurocognitive symptoms 58%<br>Respiratory symptoms 52%<br>Shock 75%<br>Complete KD 64%<br>HD without shock 76%                                                        | Any coronary abnormality 48% (Z score $\geq 2.5$ – 15%; Z score 2-2.49 – 9%)<br>Any dysfunction 58%: (LVEF 45-54% - 33%; LVEF 35-44% - 24%) | IgG + and Nucleic acid amplification + 18%<br>IgG + and Nucleic acid amplification negative 73%<br>Nucleic acid amplification +, serology test unavailable 9% | PICU 79%<br>MV 18%<br>Inotrope/vasopressor support 76%               | IVIG 100%<br>2 <sup>nd</sup> dose IVIG 33%<br>Methylprednisolone 70%<br>Aspirin 88%<br>Anakinra 12%<br>Tocilizumab 9%<br>Infliximab 13%<br>Enoxaparin 42% | None                                                                                                             |
| <b>Feldstein L.R et al [48]</b> | Fever 100%<br>Bilateral conjunctival injection 55%<br>Oral mucose changes 42%<br>Peripheral extremity changes 37%<br>Rash 59%                                                                           | Abnormal ECHO with coronary-artery aneurysms 9%                                                                                             | RT-PCR or antibody testing 70%                                                                                                                                | PICU 80%<br>MV 20%<br>Inotrope or vasopressor support 48%<br>ECMO 4% | IVIG 77%<br>Secon dose 21%<br>Systemic glucocorticoid 49%<br>Interleukin-6 inhibitor 8%<br>Interleukin-1Ra inhibitor 13%<br>Anticoagulation 47%           | 28% were still hospitalized as of May 20, 2020, and 4 patients (2%) died, 2 of whom had previously been healthy. |
| <b>Dufort E et al (49)</b>      | Fever 100%, abdominal pain 61%, rash 60%,conjunctivitis 56%                                                                                                                                             | Abnormal ECHO with coronary-artery aneurysm 9%                                                                                              | RT-PCR 51%, IgG antibodies 99%                                                                                                                                | PICU 80%, MV 10%, Vasopressor support 62%, ECMO 4%                   | IVIG 48%<br>Systemic glucocorticoids 64%                                                                                                                  | Death 2%, shock 10%, myocarditis 53%                                                                             |

1  
2  
3  
4 *Abbreviations: MV: mechanical ventilation, HFNC: high flow nasal cannula, NIV:noninvasive ventilation, RRT:renal replacement therapy, VA-*  
5 *ECMO: venu-arterial extracorporeal membrane oxygenation, PCR: protein C reactive, IVIG: immunoglobulin, FEVE: fraction ejection*  
6 *ventricular, RT-PCR: real time polymerase chain reaction, PICU: pediatric intensive care unit, KD:Kawasaki disease*  
7

8 *Supplementary File. Table S1. Clinical findings, echocardiographic and treatments instituted in the described series of PIMS-TS*  
9  
10  
11  
12  
13  
14  
15  
16  
17  
18  
19  
20  
21  
22  
23  
24  
25  
26  
27  
28  
29  
30  
31  
32  
33  
34  
35  
36  
37  
38  
39  
40  
41  
42  
43  
44  
45  
46
