# Supplementary material for: Paediatric inflammatory multisystem syndrome temporally associated with COVID-19 (PIMS-TS): a narrative review and the viewpoint of the Latin American Society of Pediatric Intensive Care (SLACIP) Sepsis Committee
Source: PubMed Central journal article supplement — BMJ Paediatr Open. 2021 Feb 4;5(1):e000894. doi: 10.1136/bmjpo-2020-000894 (PMC7868133; doi:10.1136/bmjpo-2020-000894), 2021-02-04
Supplement: bmjpo-2020-000894supp001.pdf [file bmjpo-2020-000894supp001.pdf]

| Author                     | Clinical presentation                                                                                                                                                                                                                                                                         | ECHO                                                                                                                                                                          | SARS-CoV-2 test                                                                                                           | Organ support                                                                                                               | Treatment                                                                                                   | Outcome / Died                                        |
|----------------------------|-----------------------------------------------------------------------------------------------------------------------------------------------------------------------------------------------------------------------------------------------------------------------------------------------|-------------------------------------------------------------------------------------------------------------------------------------------------------------------------------|---------------------------------------------------------------------------------------------------------------------------|-----------------------------------------------------------------------------------------------------------------------------|-------------------------------------------------------------------------------------------------------------|-------------------------------------------------------|
| <b>Whittaker et al [3]</b> | Fever 100%, Headache 26% Vomiting 45% Diarrhea 52%, Abdominal pain 53%, Rash 52% Conjunctivitis 45% Lymphadenopathy 16% Mucus membrane, changes/red cracked lips 29% Swollen hands and feet 16%, Respiratory symptoms 21%.<br><b>Fever + elevated inflammatory markers – 40%, Shock - 50%</b> | Left ventricular dysfunction 62% (18/29)<br>Abnormally dilated coronary arteries (z score >2) 8/55<br>Giant coronary artery aneurysms 2<br>Coronary artery aneurism 14% (n=8) | RT-PCR SARS-CoV-2 + 26%<br>IgG antibody SARS-CoV-2 + 87%<br><br>78% had evidence of current or prior SARS-CoV-2 infection | PICU 50%<br>Acute kidney injury 22%<br>Shock + inotropic support 47%<br>MV 43%<br>ECMO 5%                                   | Inotropic support 47%<br>IVIg 71%<br>Corticosteroids 64%<br>Anakinra 5%<br>Infliximab 14%                   | Death 2%                                              |
| <b>Riphagen et al [6]</b>  | Fever 8/8<br>Diarrhoea 7/8<br>Abdominal pain 6/8<br>Vomiting 4/8<br>Conjunctivitis 5/8<br>Rash 4/8<br>Vasoplegic shock 8/8                                                                                                                                                                    | 7/8 ventricular dysfunction<br>Echobright coronary vessels<br>1/8 giant coronary aneurysm                                                                                     | SARS-CoV-2 negative 5/8<br>SARS-CoV-2 positive 2/8<br>Family exposure 4/8                                                 | Inotropic/vasopressor support 8/8, MV 5/8, HFNC 1/8, NIV 3/8, RRT 1/8, VA-ECMO 1/8 (arrhythmia with refractory shock, died) | IVIg 8/8, Corticoids 5/8<br>Aspirin 3/8, Heparin 1/8,<br>Antibiotics 8/8, Infliximab 1/8                    | 1 died<br>6/8 alive<br>PICU length of stay 3 – 7 days |
| <b>Verdoni et al [7]</b>   | Classic form of Kawasaki 50%, Incomplete form of Kawasaki disease 50%<br>Kdss and MAS 50%<br>Diarrhoea 60%<br>Meningeal signs 40%<br>Drowsiness 10%                                                                                                                                           | <b>Anormal ECHO 60%</b><br><b>Aneurism 10%</b><br><b>FEVE &lt; 50% – 50%</b><br>Mitral valve regurgitation 10%<br>Pericardial effusion 40%                                    | RT-PCR SARS-CoV-2 + 20%<br>Serology for SARS-CoV-2 antibodies – 80% were IgG +, and 3 were also IgM +                     |                                                                                                                             | Inotropic support 20%<br>Adjunctive steroid treatment 80%<br>IVIg 100%<br>Aspirin 20%                       | None                                                  |
| <b>Belhadjer et al [8]</b> | Asthenia 100%<br>Fever 100%<br>GI symptoms 83% (2 children underwent emergency operation for suspected appendicitis)<br>Respiratory distress 65%                                                                                                                                              | Coronary artery dilatation (z score > 2) 17%<br>Aneurysm 0<br>LVEF < 30% - 28%<br>LVEF 30-50% - 72%                                                                           | SARS-CoV-2 was confirmed 88.5%<br>RT-PCR-SARS-CoV-2 + 34%<br>Fecal PCR 6%<br>Antibodies + 86%                             | Respiratory support 94% (IMV 62%; NIV 32%)<br>VA-ECMO 28%                                                                   | Inotropic support 80%<br>IVIg 71%<br>Corticosteroids 34%<br>Anakinra 8%<br>Anticoagulation with heparin 65% | None                                                  |

|                                  |                                                                                                                                                                                                                                                               |                                                                                                                                     |                                                                                                                                                    |                                                                                                   |                                                                                                                                  |                                                |
|----------------------------------|---------------------------------------------------------------------------------------------------------------------------------------------------------------------------------------------------------------------------------------------------------------|-------------------------------------------------------------------------------------------------------------------------------------|----------------------------------------------------------------------------------------------------------------------------------------------------|---------------------------------------------------------------------------------------------------|----------------------------------------------------------------------------------------------------------------------------------|------------------------------------------------|
|                                  | Rhinorrhea 43%<br>Adenopathy 60%<br>Rash 57%<br>Meningism 31%<br>At admission to the ICU, 80% were in cardiogenic shock                                                                                                                                       |                                                                                                                                     |                                                                                                                                                    |                                                                                                   |                                                                                                                                  |                                                |
| <b>Grimaud et al [9]</b>         | Fever 100%, Abdominal pain 100%, Rash 50%, Conjunctivitis 30%, Adenitis 20%, Tachycardia 100%<br>Hypotension 100% (75% clinical signs of vasoplegia)                                                                                                          | LVEF 35% (IQR 25-55)                                                                                                                | SARS-CoV-nasopharyngeal swabs + 50% SARS-CoV-2 antibodies + 100% (15/15), <b>95% had identified SARS-CoV-2 infection on PCR and/or by serology</b> | NIV 55%,IMV 40%, HFNO 5%,Respiratory support in all patient was indicated for hemodynamic support | IVIg100%,Corticosteroids 10%, Anakinra 5%, Tocilizumab 5%, Inotropic/vasopressor support 95%                                     | None                                           |
| <b>Cheung et al [33]</b>         | Fever 100% GI symptoms 88% Shock at presentation 76% Rash 71%, Conjunctivitis 65% Lip redness/swelling 65% Neurologic symptoms 47%, Respiratory symptoms 41%, Myalgia 35%, Lymphadenopathy 35%, Hypoxia 18%<br>Criteria for KD 47%<br>Incomplete Kawasaki 29% | FEVE mildly decreased 29%<br>FEVE mild-moderately decreased 24%<br>FEVE moderate-severely decreased 12%<br>Pericardial effusion 47% | RT-PCR SARS-CoV-2 + 47%<br>Serology for SARS-CoV-2 antibodies → 53%                                                                                | PICU 88%                                                                                          | IVIg 76%<br>Methylprednisolone 71%<br>Hydrocortisone 21%<br>Enoxaparin prophylaxis 59%<br>Enoxaparin treatment 6%<br>Aspirin 24% | None                                           |
| <b>Golfred-Cato S et al [13]</b> | Fever 100%<br>Bilateral conjunctival injection 48.4%<br>Oral mucose changes 23%<br>Rash 55.3%                                                                                                                                                                 | Abnormal ECHO with coronary-artery aneurysms 18.6%                                                                                  | RT-PCR 25.8%<br>Serology positive 46.1%<br>RT-PCR and serology positive 27.2%                                                                      | PICU 63.9%<br>MV 13.1%<br>Vasoactives 44.9%                                                       | IVIg 80.5%<br>Steroids 62.8%<br>Antiplatelet medication 58.6%<br>Anticoagulation 44.2%                                           | Died 1.8%<br>Organs systems involved 4-5 61.6% |
| <b>Kaushik et al [38]</b>        | Fever 93%, Abdominal pain 63%, Nausea/emesis 69%, Diarrhea 48%                                                                                                                                                                                                | Pericardial effusion 46%                                                                                                            | SARS-CoV-2 antibody + 81%                                                                                                                          | NIV 36%<br>IMV 15%<br>ECMO 3%                                                                     | IVIg 54%, Corticosteroids 51%, Tocilizumab 36%                                                                                   | Death 3%                                       |

|                             |                                                                                                                                                                                                                                                                                                                                                            |                                                                                                                                                                                                                                       |                                                                                                                                                                                                                                             |                                                        |                                                                                                                                                                                                       |      |
|-----------------------------|------------------------------------------------------------------------------------------------------------------------------------------------------------------------------------------------------------------------------------------------------------------------------------------------------------------------------------------------------------|---------------------------------------------------------------------------------------------------------------------------------------------------------------------------------------------------------------------------------------|---------------------------------------------------------------------------------------------------------------------------------------------------------------------------------------------------------------------------------------------|--------------------------------------------------------|-------------------------------------------------------------------------------------------------------------------------------------------------------------------------------------------------------|------|
|                             | Hypotension 63%, Mucocutaneous, involvement 21%<br>Conjunctivitis 36%<br>Rash 42%, Shortness of breath 33%<br>Neurologic involvement 12%                                                                                                                                                                                                                   | LVEF median 46.6 (IQR 39.5, 52.8)<br>LVEF < 30%: 12%<br>LVEF 30-50%: 53%<br>Recovered LV function prior to discharge 95%                                                                                                              | RT-PCR SARS-CoV-2 + 33%<br>18% tested + for both                                                                                                                                                                                            | Intra-aortic balloon pump support 3%                   | Remdesivir 21%, Anakinra 12%, Convalescent plasma therapy 3%, Aspirin 24%<br>Anticoagulation, prophylaxis 15%, Anticoagulation, therapeutic 81%<br>Antibiotics > 48h 45%<br>Vasopressor/inotropes 51% |      |
| <b>Ramcharan et al [40]</b> | Fever 100%<br>GI symptoms 87%<br>Incomplete KD 53%                                                                                                                                                                                                                                                                                                         | 93% coronary artery abnormalities<br>LVEF median on admission 51%                                                                                                                                                                     | 13% described typical COVID-19 symptoms in the previous two months<br>20% related contact with family member with COVID-19                                                                                                                  | Respiratory support 53%<br>Inotrope or vasopressor 67% | IVIg 67% (10/15), of whom 2 received a second dose<br>Methylprednisolone 33%<br>73% were discharged on low dose aspirin<br>Antibiotic 100%                                                            | None |
| <b>Toubiana et al [45]</b>  | Recent history of viral-like symptoms was reported in 43%<br>Median duration between these symptoms and the onset of signs and symptoms of Kawasaki disease was 45 days.<br>Complete presentation of KD 52%, Abdominal symptoms 95%, Lips and oral cavity changes 76%<br>Conjunctivitis 81%<br>Rash 76%, Changes to extremities 48%<br>Lymphadenopathy 57% | Myocarditis 76% (LVEF range between 10 and 57%)<br>38% coronary artery abnormalities: 24% which consisted of dilations (z score between 2.0 and 2.5); 14% with increased coronary visibility<br>No coronary aneurysms were identified | History of recent contact with people with viral-like symptoms was + in 48%<br>Median interval between reported contact and KD was 36 days<br>RT-PCR-SARS-CoV-2 + 38%<br>IgG antibodies SARS-CoV-2 + 90%<br>9.5% negative Serology and PCR) | PICU 81%<br>Vasoactive agents 71%<br>MV 52%            | IVIg 100% (24% needed a second dose)<br>Low dose aspirin (3-5mg/kg/day) 100%<br>Corticosteroids (2-10mg/kg/day) 48%<br>Antibiotic 86%                                                                 | None |
| <b>Pouletty et al [46]</b>  | Fever 100%<br>Respiratory signs 12%<br>GI signs 81%<br>Anosmia 6%                                                                                                                                                                                                                                                                                          | Abnormal ECHO 69%<br>Coronary dilatation 19% (median z score 2.6)                                                                                                                                                                     | Family c/s COVID-19 infection 75%<br>First infectious exposure-                                                                                                                                                                             |                                                        | IVIg 93% (Second infusion 335)<br>Steroids 25%<br>Anakinra 6%                                                                                                                                         | None |

|                                 |                                                                                                                                                                                                         |                                                                                                                                             |                                                                                                                                                               |                                                                      |                                                                                                                                                           |                                                                                                                  |
|---------------------------------|---------------------------------------------------------------------------------------------------------------------------------------------------------------------------------------------------------|---------------------------------------------------------------------------------------------------------------------------------------------|---------------------------------------------------------------------------------------------------------------------------------------------------------------|----------------------------------------------------------------------|-----------------------------------------------------------------------------------------------------------------------------------------------------------|------------------------------------------------------------------------------------------------------------------|
|                                 | Neurological signs 56%<br>Rash 81%<br>Conjunctivitis 94%<br>Hands and feet edema/erythema 68%<br>Dry cracked lips 87%<br>Lymphadenopathy 37%<br>Haemodynamic failure 69%<br>Complete KD 62%<br>KDSS 44% | No aneurysm<br>Myocarditis 44% (median LVEF 35%)<br>Pericarditis 25%                                                                        | hospitalization 21 days (IQR 21-24)<br>RT-PCR-SARS-CoV-2 all sites + 69%<br>Serology IgG + 87%                                                                |                                                                      | Tocilizumab 6%<br>AAS (30-50mg/kg) 52%<br>AAS anti-aggregant dose 50%                                                                                     |                                                                                                                  |
| <b>Caponi et al [47]</b>        | Fever 100%<br>GI symptoms 97%<br>Neurocognitive symptoms 58%<br>Respiratory symptoms 52%<br>Shock 75%<br>Complete KD 64%<br>HD without shock 76%                                                        | Any coronary abnormality 48% (Z score $\geq 2.5$ – 15%; Z score 2-2.49 – 9%)<br>Any dysfunction 58%: (LVEF 45-54% - 33%; LVEF 35-44% - 24%) | IgG + and Nucleic acid amplification + 18%<br>IgG + and Nucleic acid amplification negative 73%<br>Nucleic acid amplification +, serology test unavailable 9% | PICU 79%<br>MV 18%<br>Inotrope/vasopressor support 76%               | IVIG 100%<br>2 <sup>nd</sup> dose IVIG 33%<br>Methylprednisolone 70%<br>Aspirin 88%<br>Anakinra 12%<br>Tocilizumab 9%<br>Infliximab 13%<br>Enoxaparin 42% | None                                                                                                             |
| <b>Feldstein L.R et al [48]</b> | Fever 100%<br>Bilateral conjunctival injection 55%<br>Oral mucose changes 42%<br>Peripheral extremity changes 37%<br>Rash 59%                                                                           | Abnormal ECHO with coronary-artery aneurysms 9%                                                                                             | RT-PCR or antibody testing 70%                                                                                                                                | PICU 80%<br>MV 20%<br>Inotrope or vasopressor support 48%<br>ECMO 4% | IVIG 77%<br>Secon dose 21%<br>Systemic glucocorticoid 49%<br>Interleukin-6 inhibitor 8%<br>Interleukin-1Ra inhibitor 13%<br>Anticoagulation 47%           | 28% were still hospitalized as of May 20, 2020, and 4 patients (2%) died, 2 of whom had previously been healthy. |
| <b>Dufort E et al (49)</b>      | Fever 100%, abdominal pain 61%, rash 60%,conjunctivitis 56%                                                                                                                                             | Abnormal ECHO with coronary-artery aneurysm 9%                                                                                              | RT-PCR 51%, IgG antibodies 99%                                                                                                                                | PICU 80%, MV 10%, Vasopressor support 62%, ECMO 4%                   | IVIG 48%<br>Systemic glucocorticoids 64%                                                                                                                  | Death 2%, shock 10%, myocarditis 53%                                                                             |

*Abbreviations: MV: mechanical ventilation, HFNC: high flow nasal cannula, NIV: noninvasive ventilation, RRT: renal replacement therapy, VA-ECMO: veno-arterial extracorporeal membrane oxygenation, PCR: protein C reactive, IVIG: immunoglobulin, FEVE: fraction ejection ventricular, RT-PCR: real time polymerase chain reaction, PICU: pediatric intensive care unit, KD: Kawasaki disease*

*Supplementary File. Table S1. Clinical findings, echocardiographic and treatments instituted in the described series of PIMS-TS*
